# Supplementary material for: A three-dimensional histological cell atlas of the developing human brain
Source: Research Square preprint supplement (doi:10.21203/rs.3.rs-5658034/v1), 2025-01-10

# Histological reference atlas and coordinate system for a 14 gestational week fetal brain

December 10, 2024

Corresponding manuscript: Jai Jayakumar, et al. "A three-dimensional histological cell atlas of the developing human brain"

Demographic information: Specimen ID: S5/ FB40 AP (cms): 4.4 Bi temporal diameter (cms): 2.8 Brain weight (gms): 8.62 Age (GW): 14 Sex: M

This atlas includes serial section histology data, with neighboring sections aligned. Sections are 20um thick and collected in a series of three, alternating between Nissl, H&E, and various antibody stains (not shown), so that sections corresponding to a individual stain type are 60 um apart.

We have developed a standard RAS (x=Right, y=Anterior, z=Superior) coordinate system described as shown below. Please refer to figure 2 in the manuscript.

The data below shows this coordinate system as a curvilinear grid, with 10mm spaced isocontours, labeled in mm. Red lines correspond to the left-right axis with right positive. Green lines correspond to the posterior-anterior axis with anterior positive. Blue lines correspond to the inferior-superior axis with superior positive. The x=0, y=0, and z=0 lines are drawn thicker. Note that our sagittal histology sections are nearly perpendicular to the left right axis, and so red lines appear more curved.

Below we show alternating pages with manually drawn annotations with median spacing between annotations of 0.54mm. Corresponding Nissl stained sections on which annotations were drawn are also included, here downsampled to 64 micron in plane resolution. Finally where neighboring tissue sections are available with H&E stain, these sections are also shown also at 64 micron resolution.

The horizontal and vertical axes of the image in each section also labeled with tick marks in mm, with 10 mm spacing to help with understanding scale.



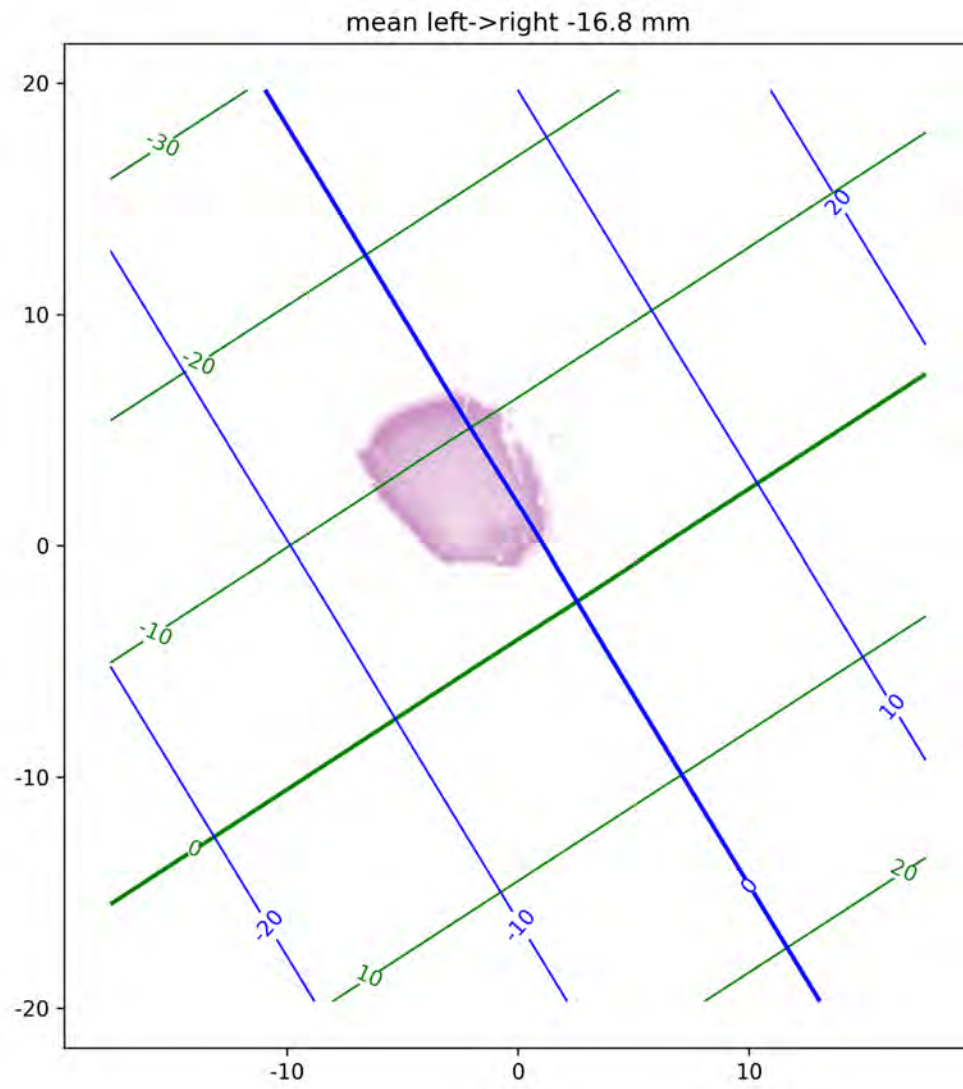

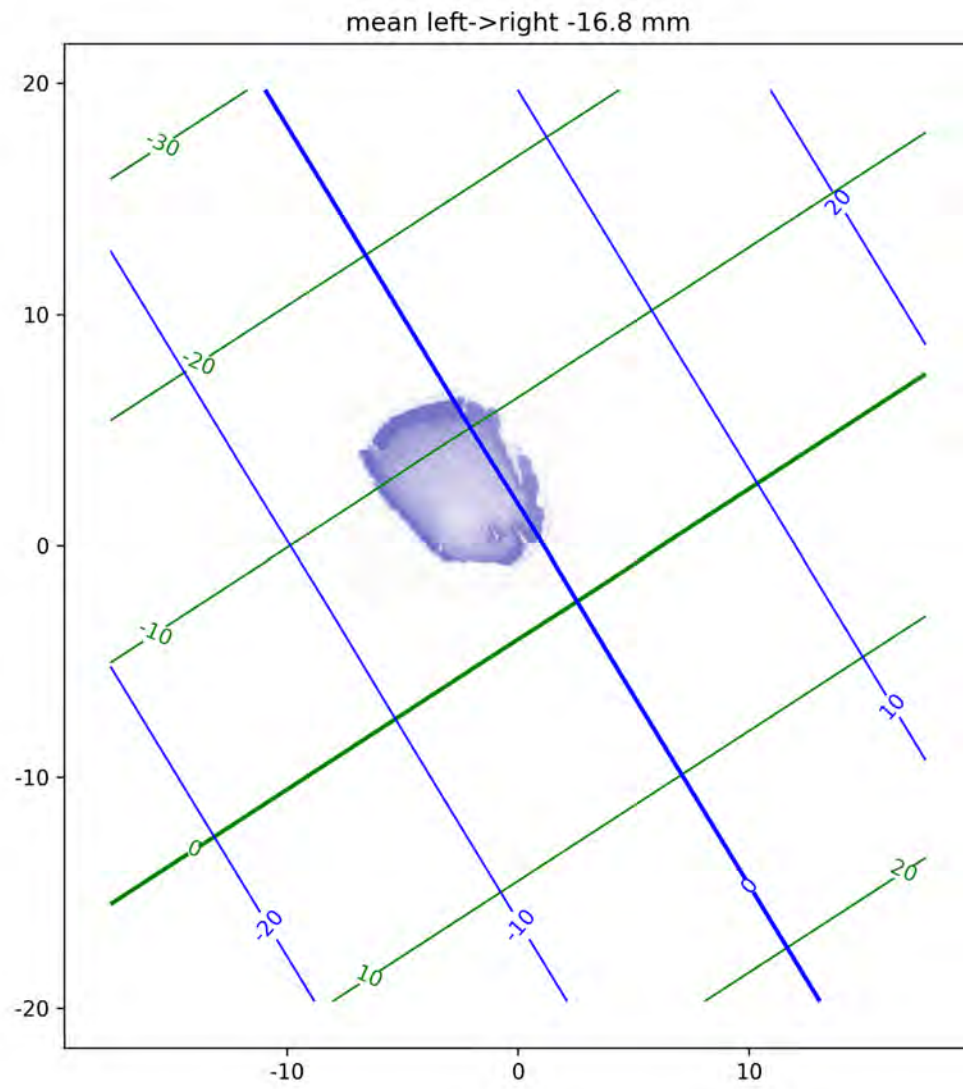

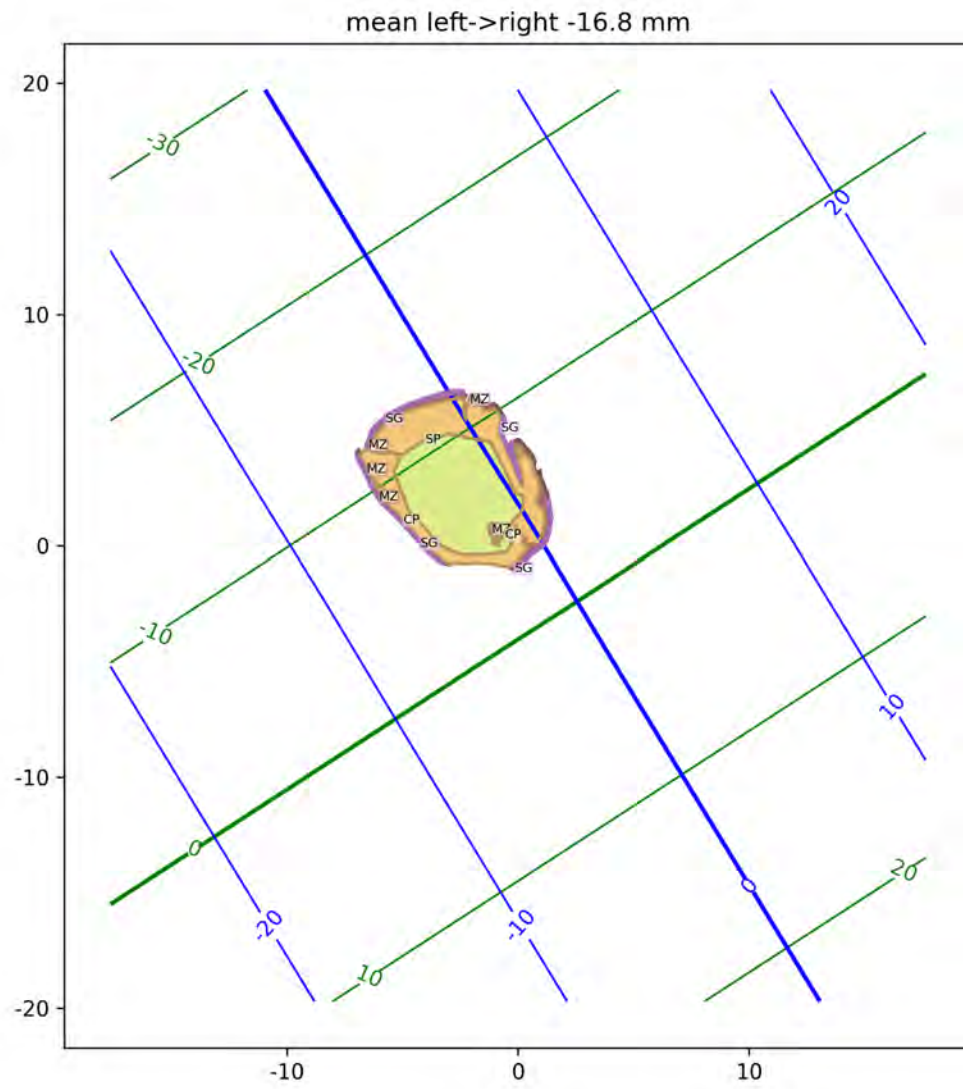

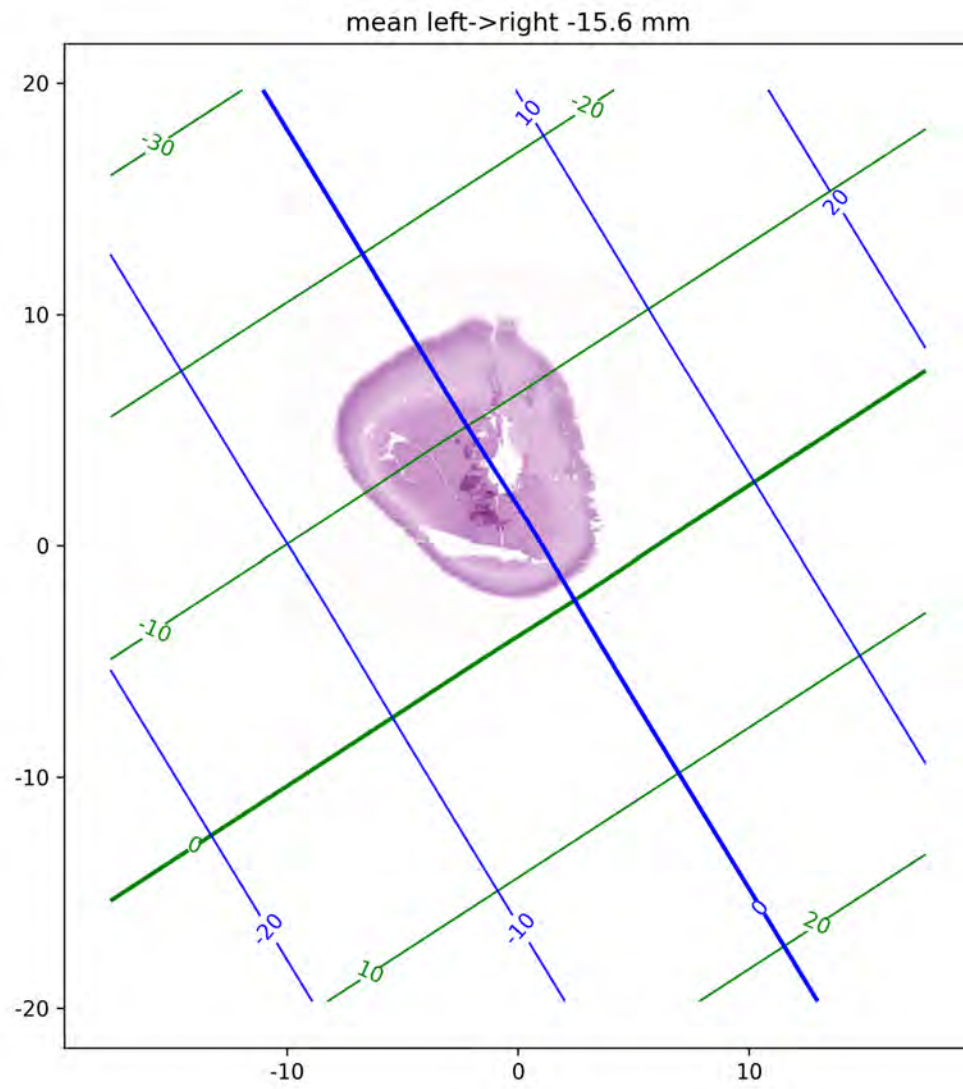



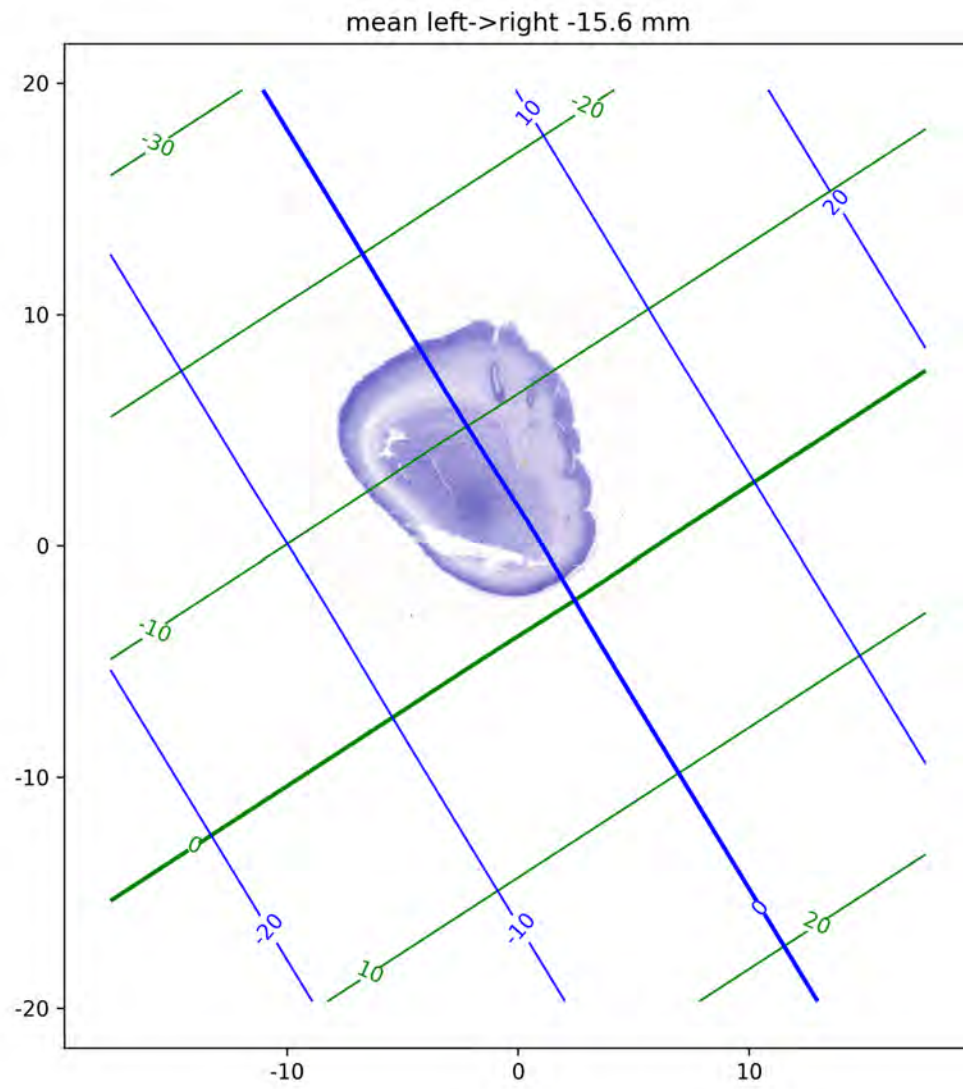

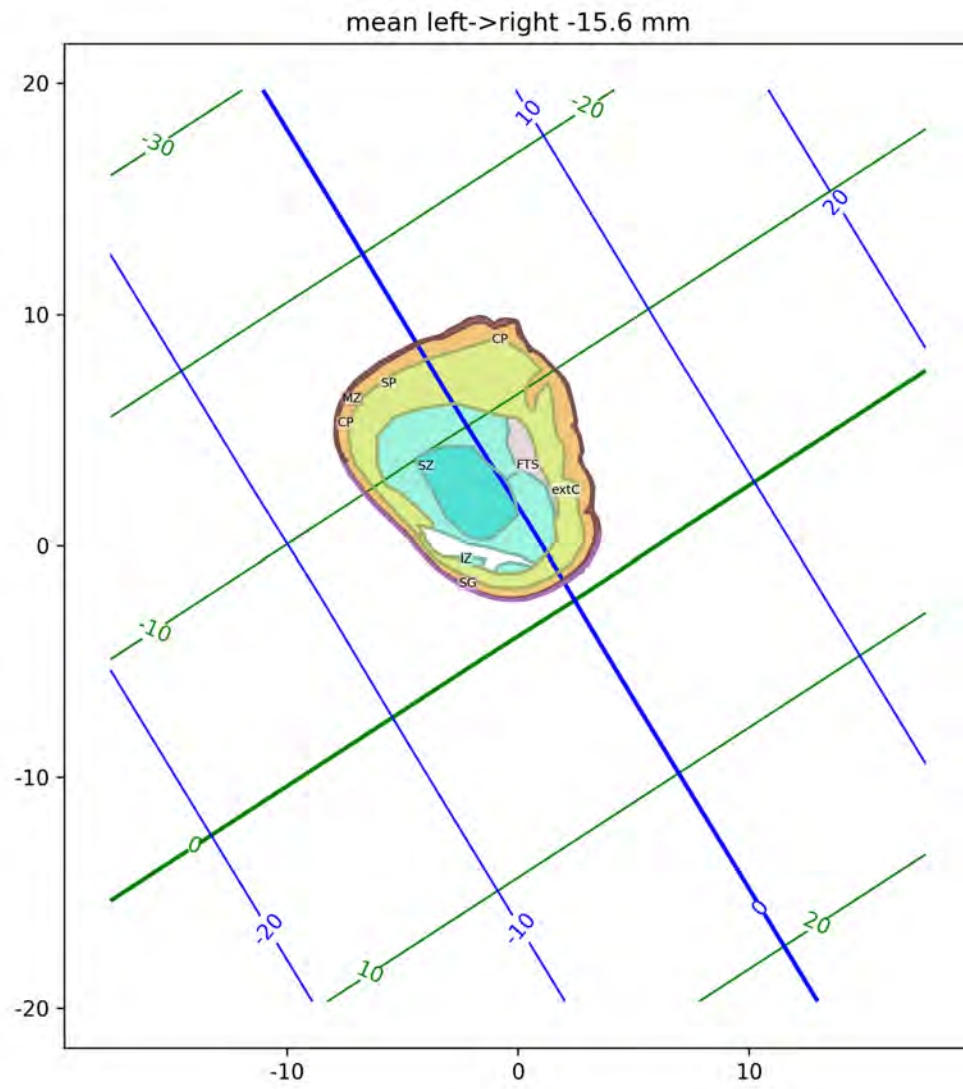



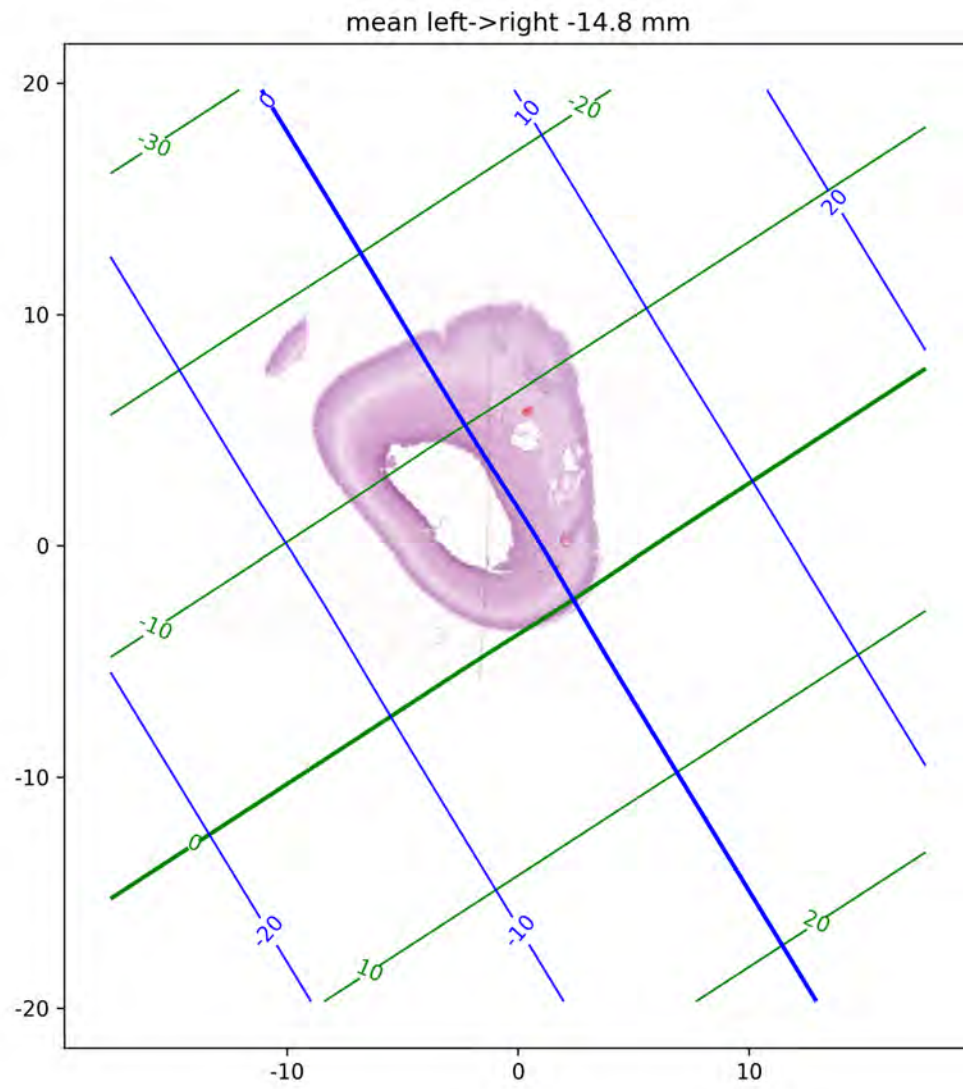

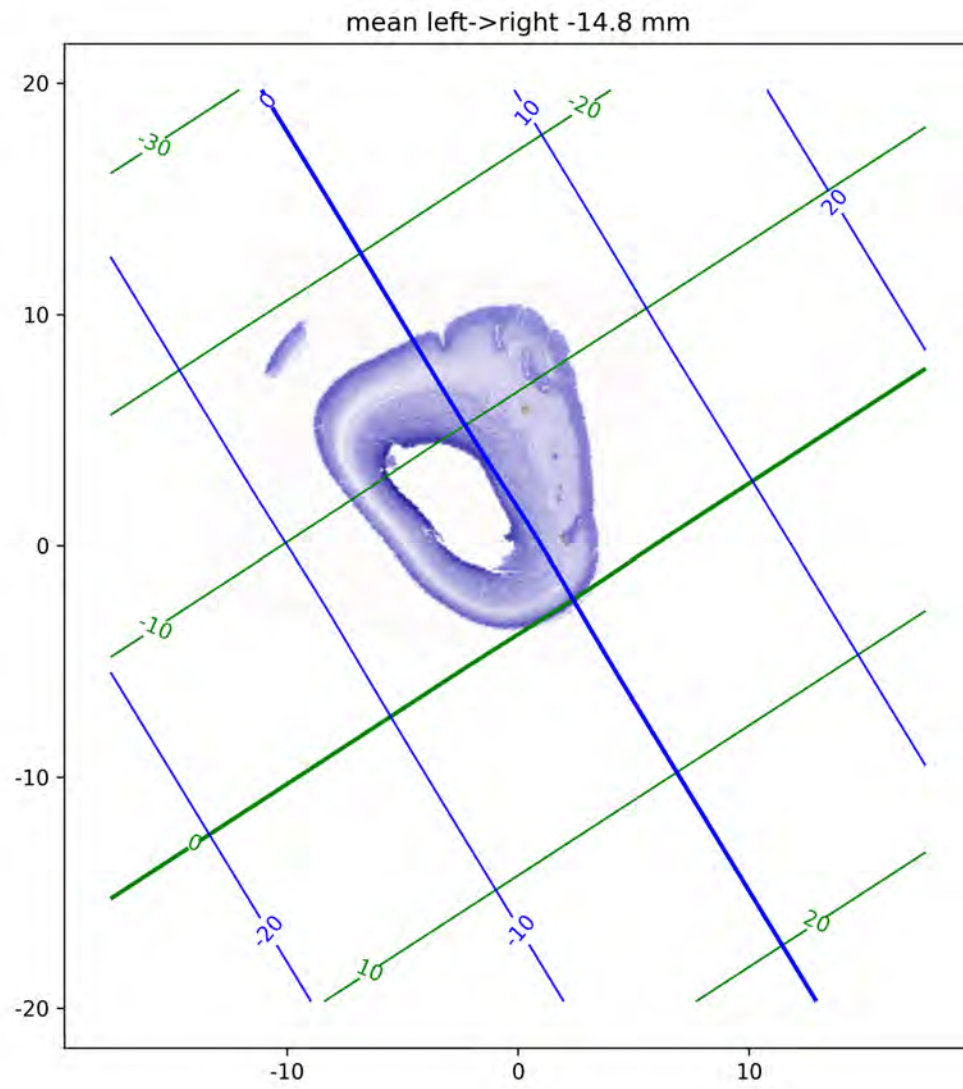

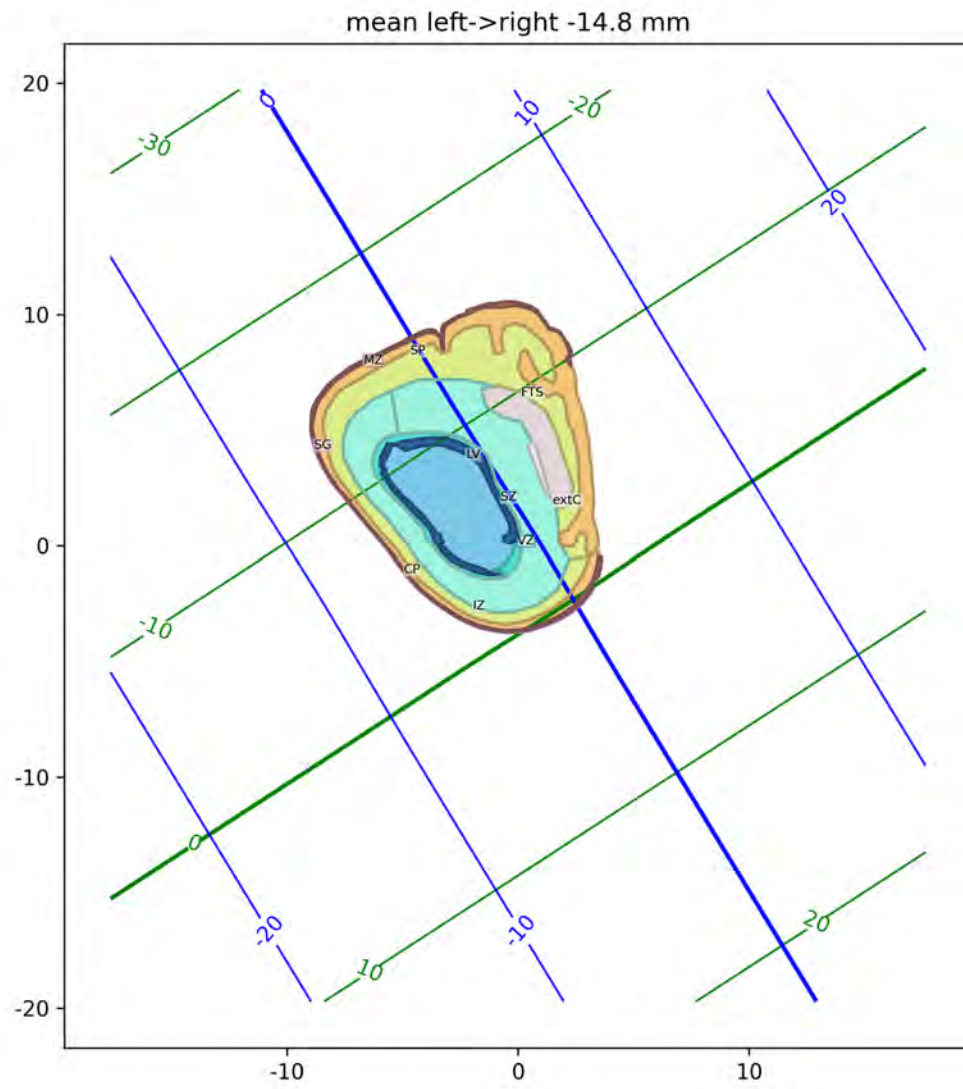

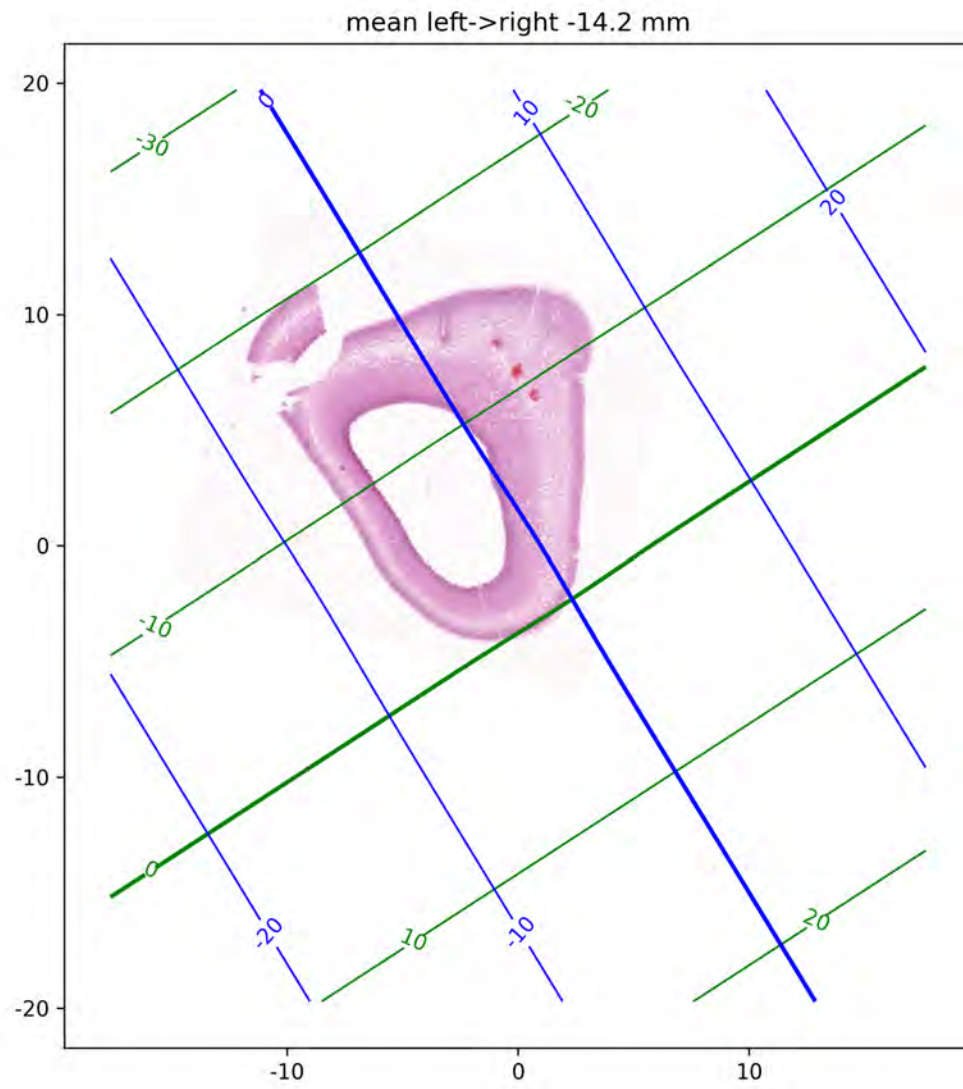

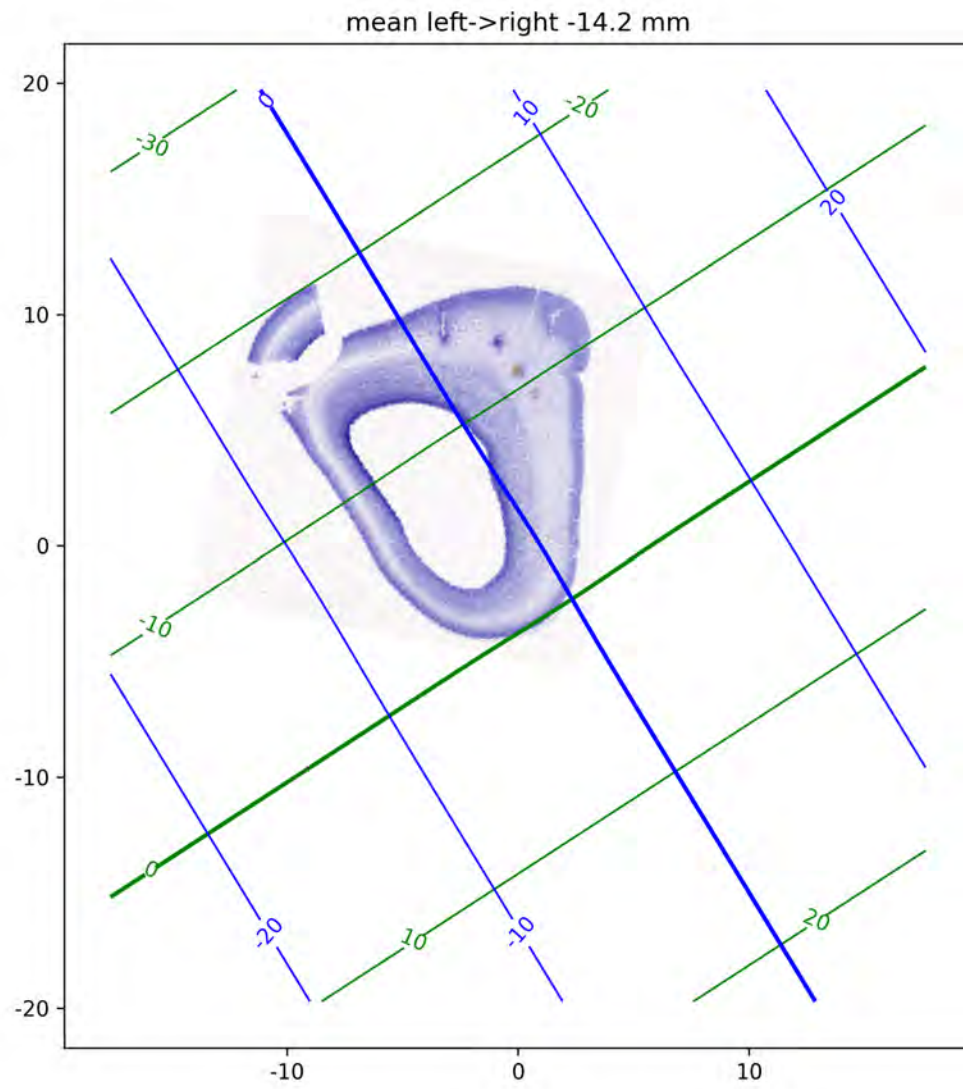

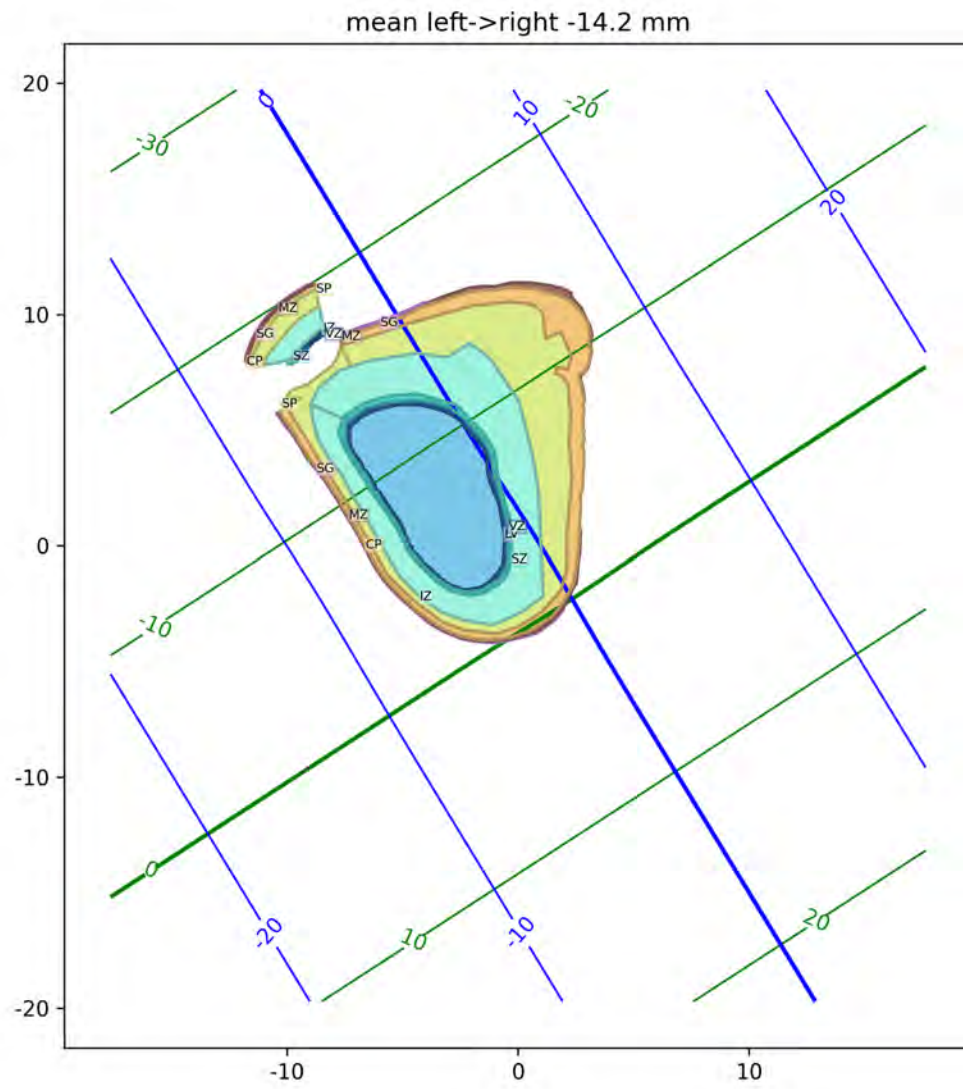



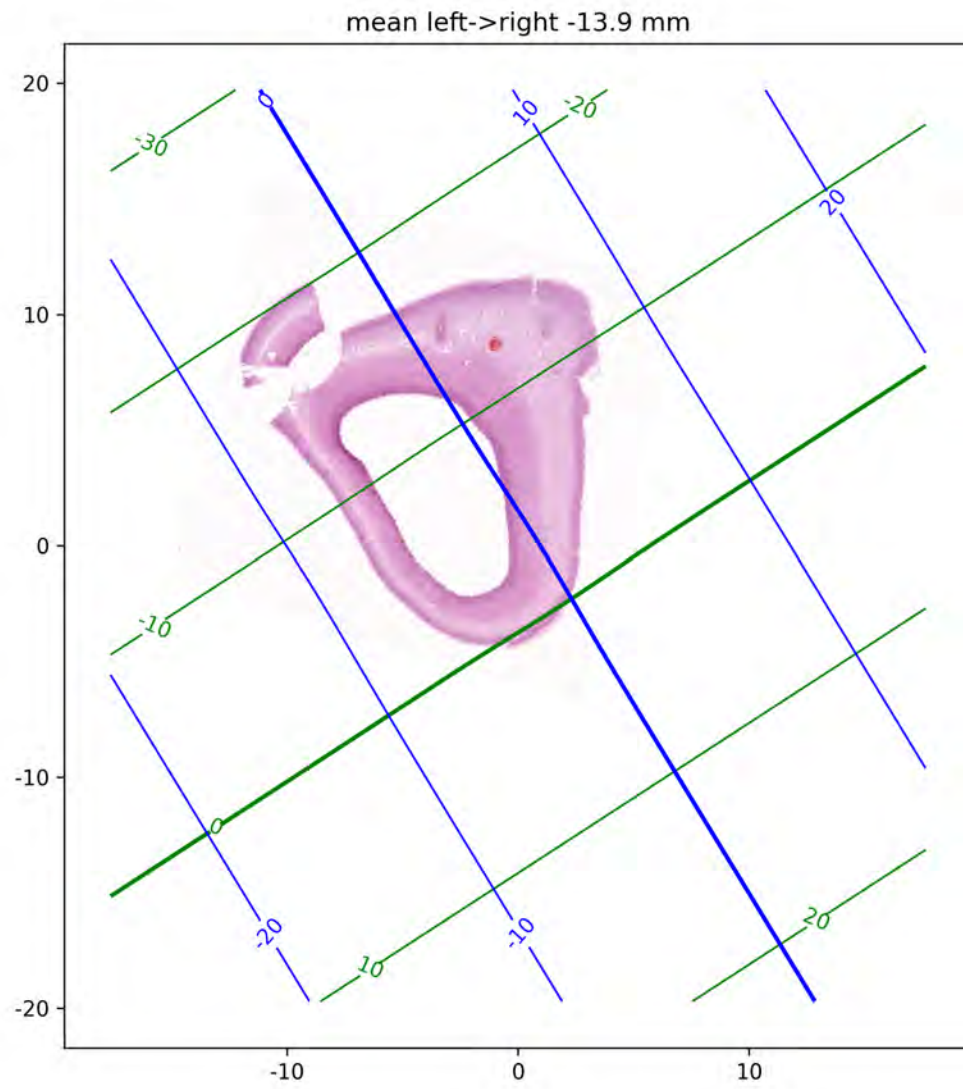

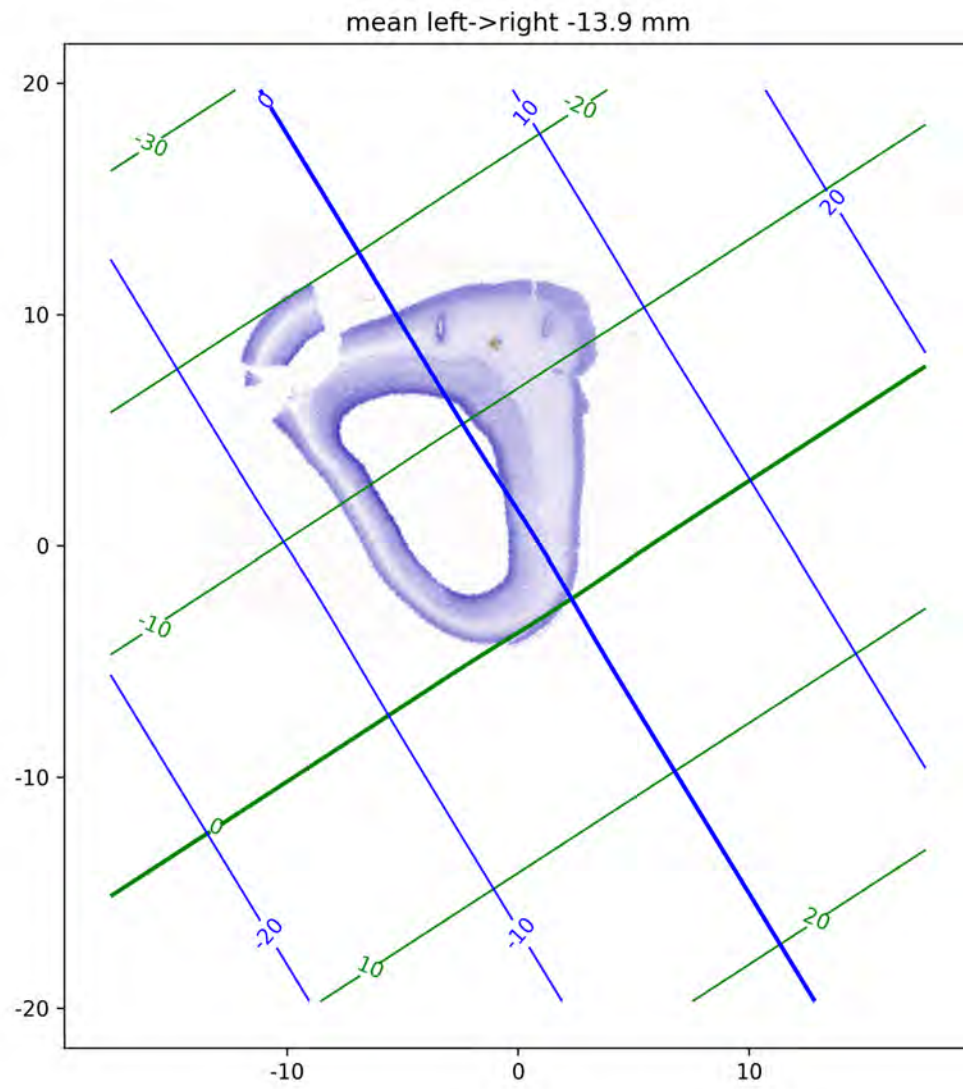

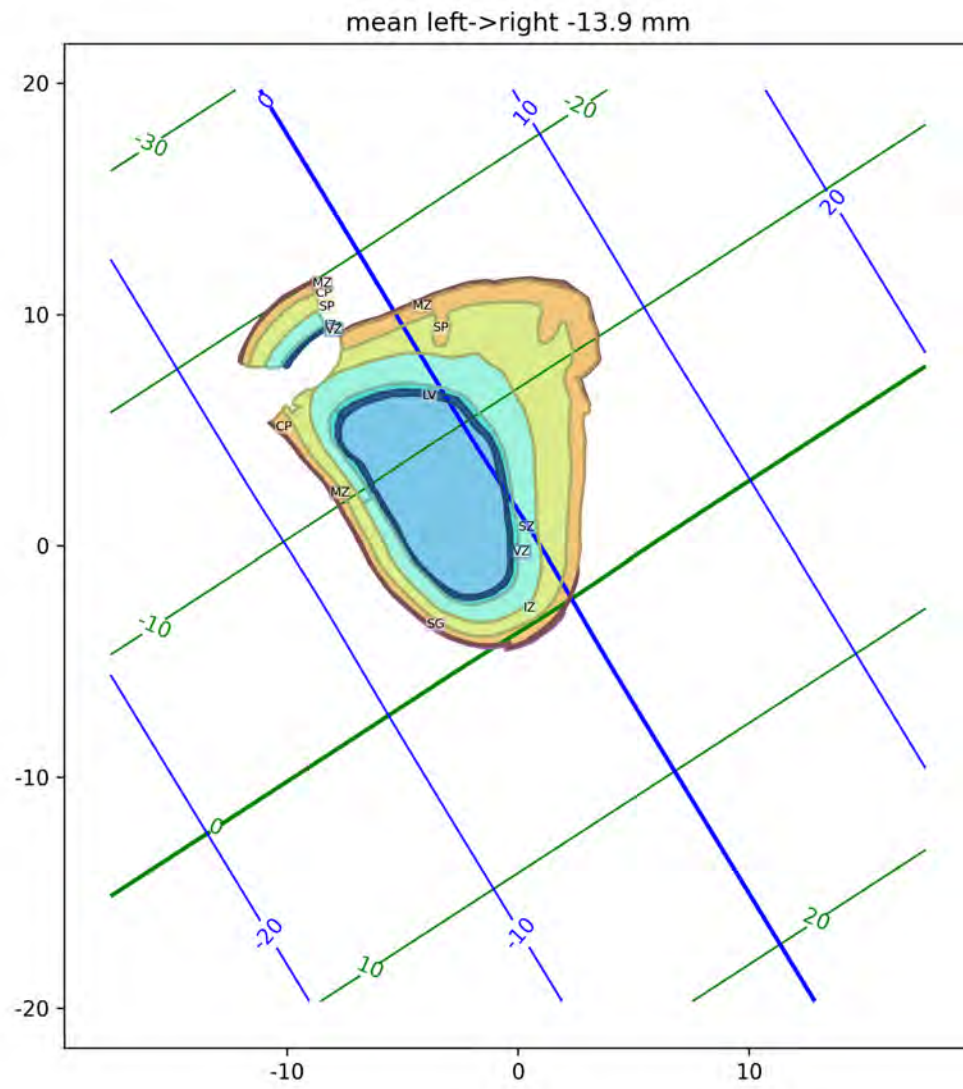

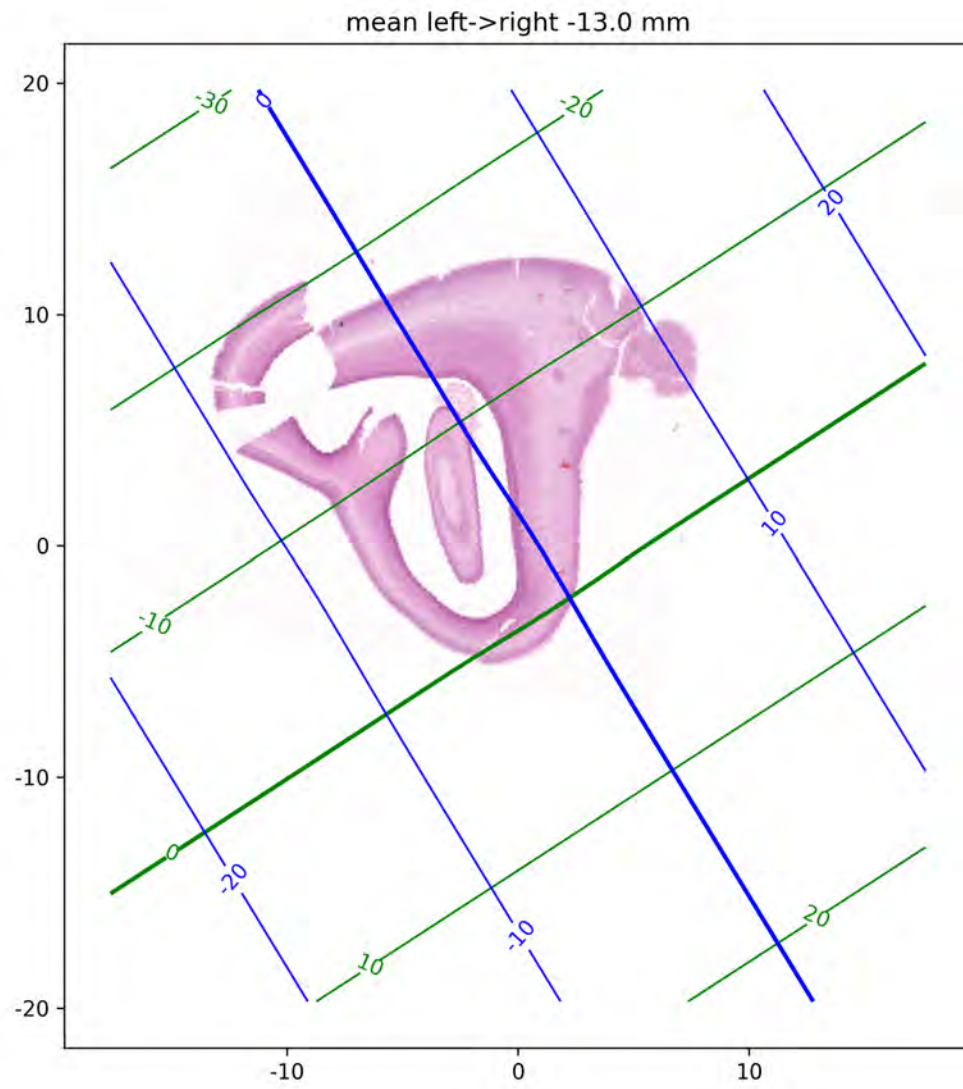

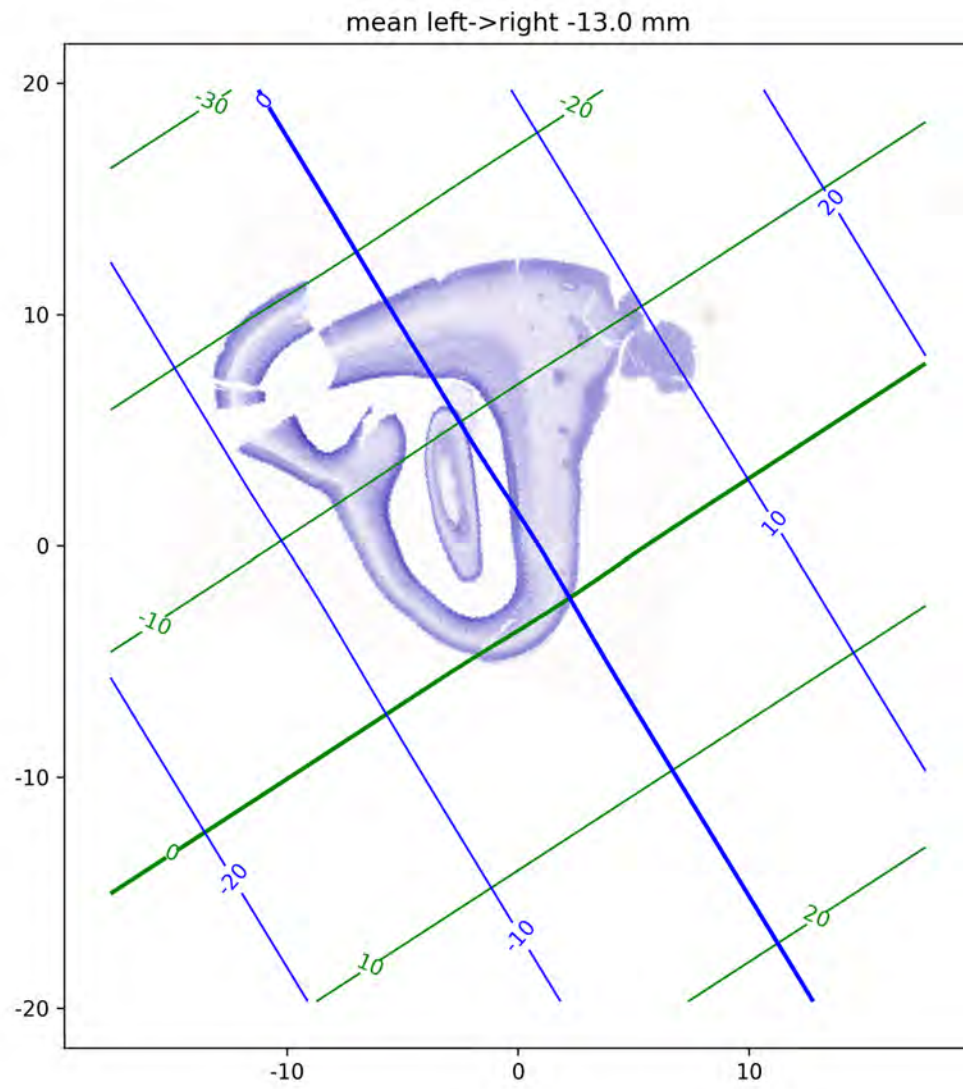

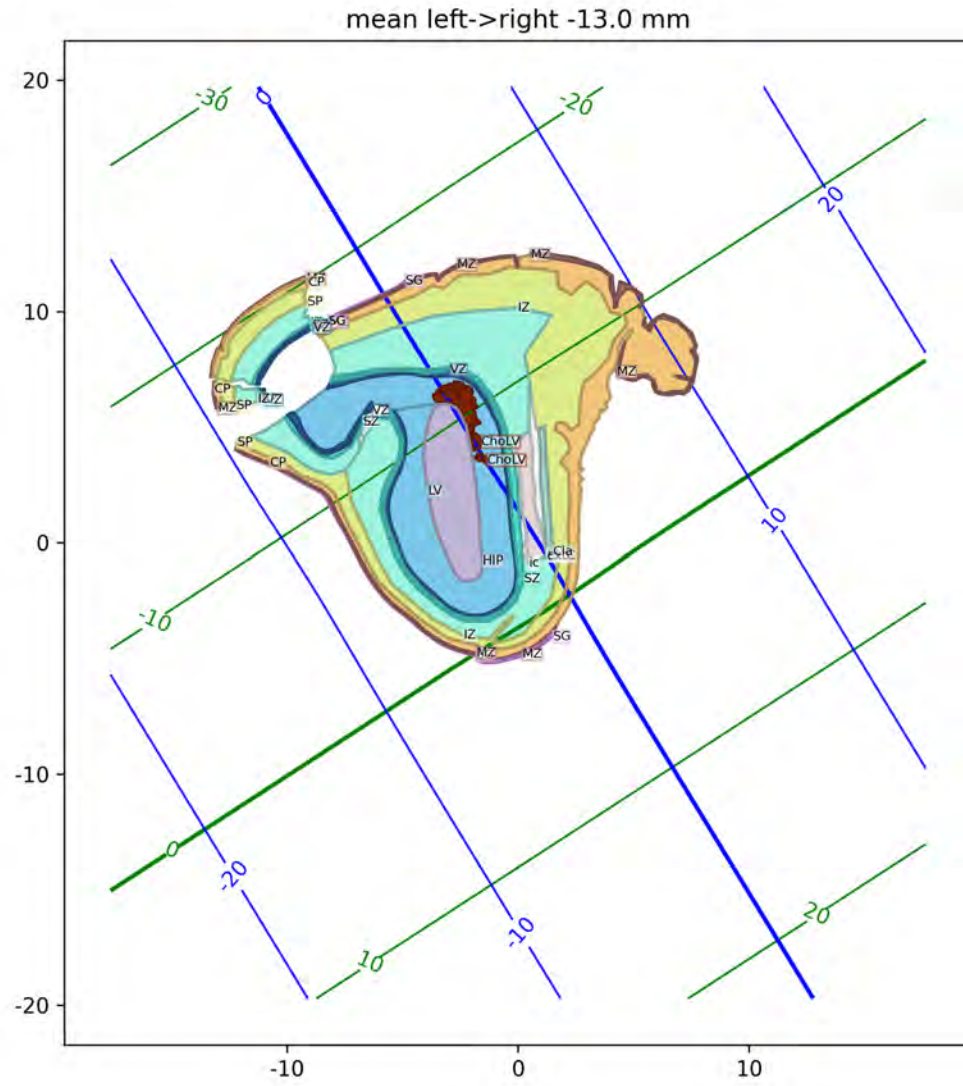



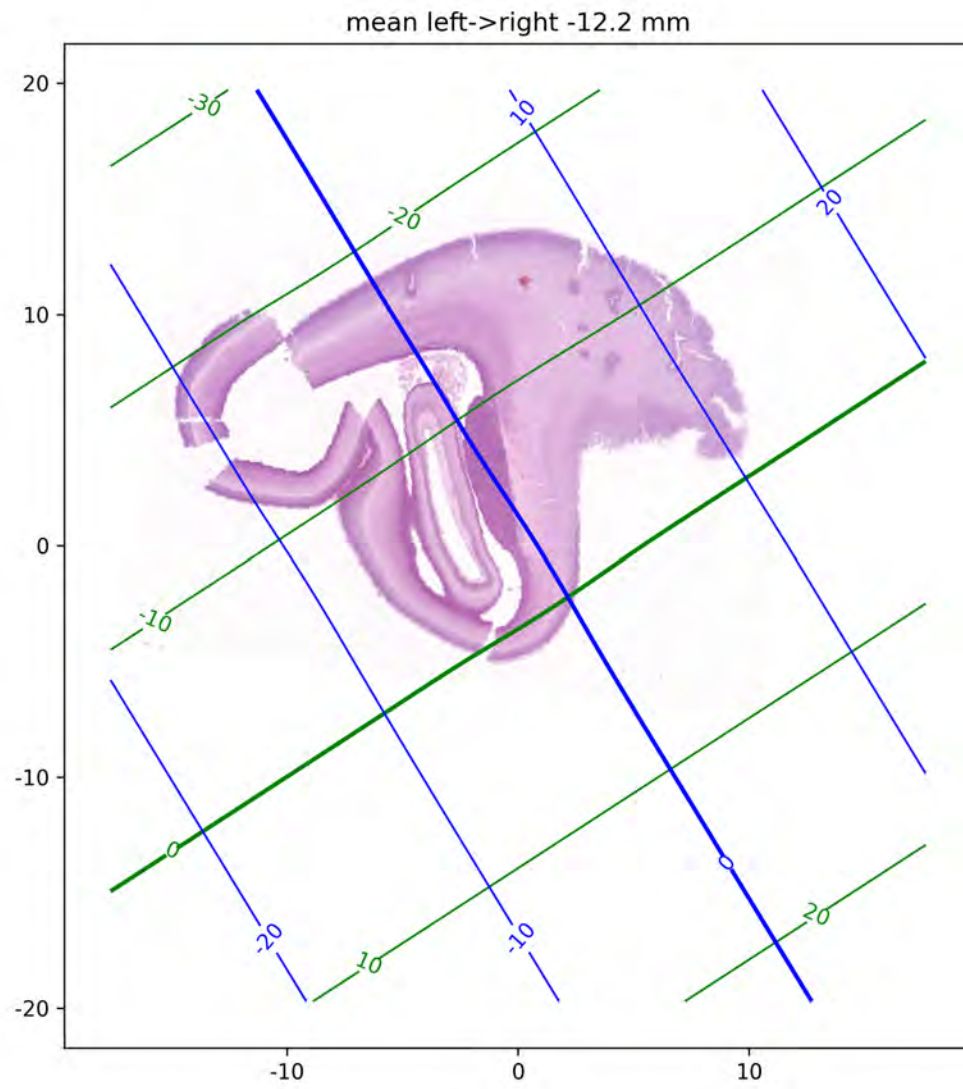

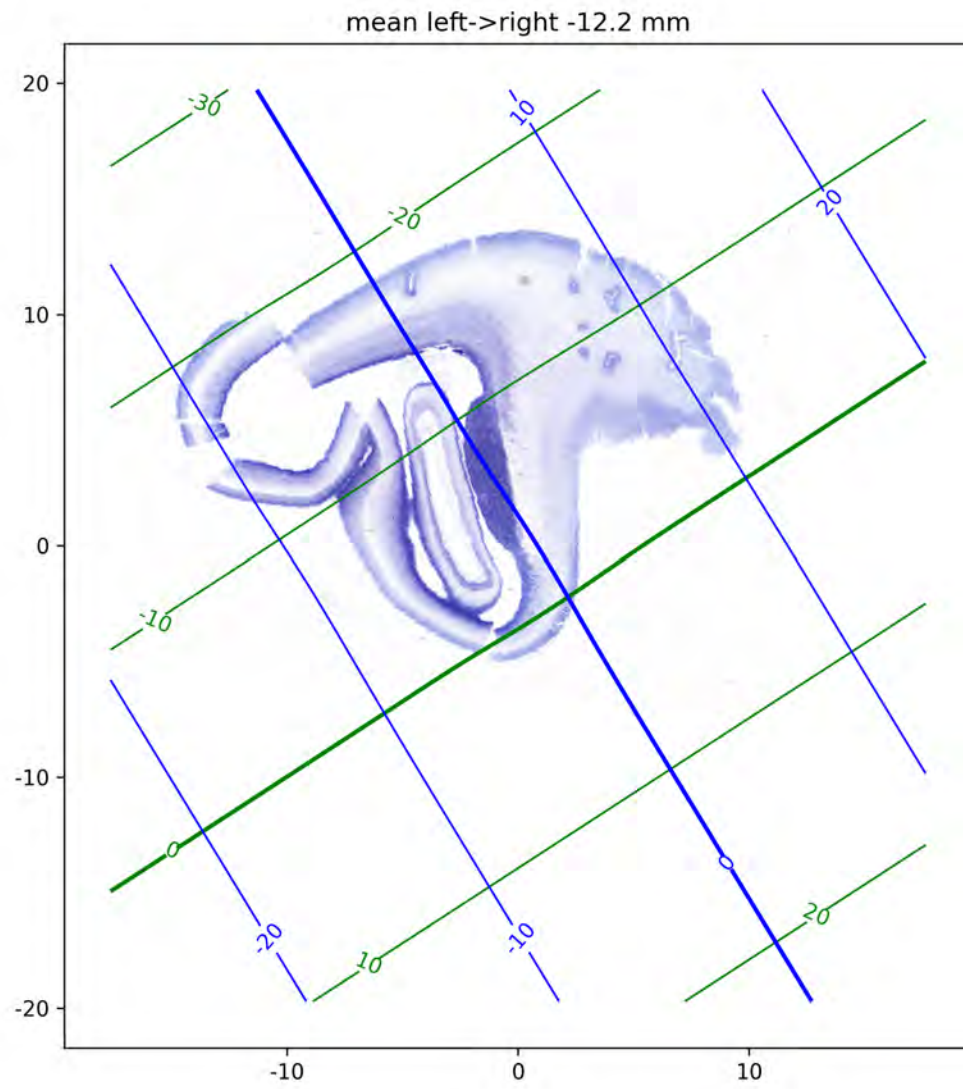

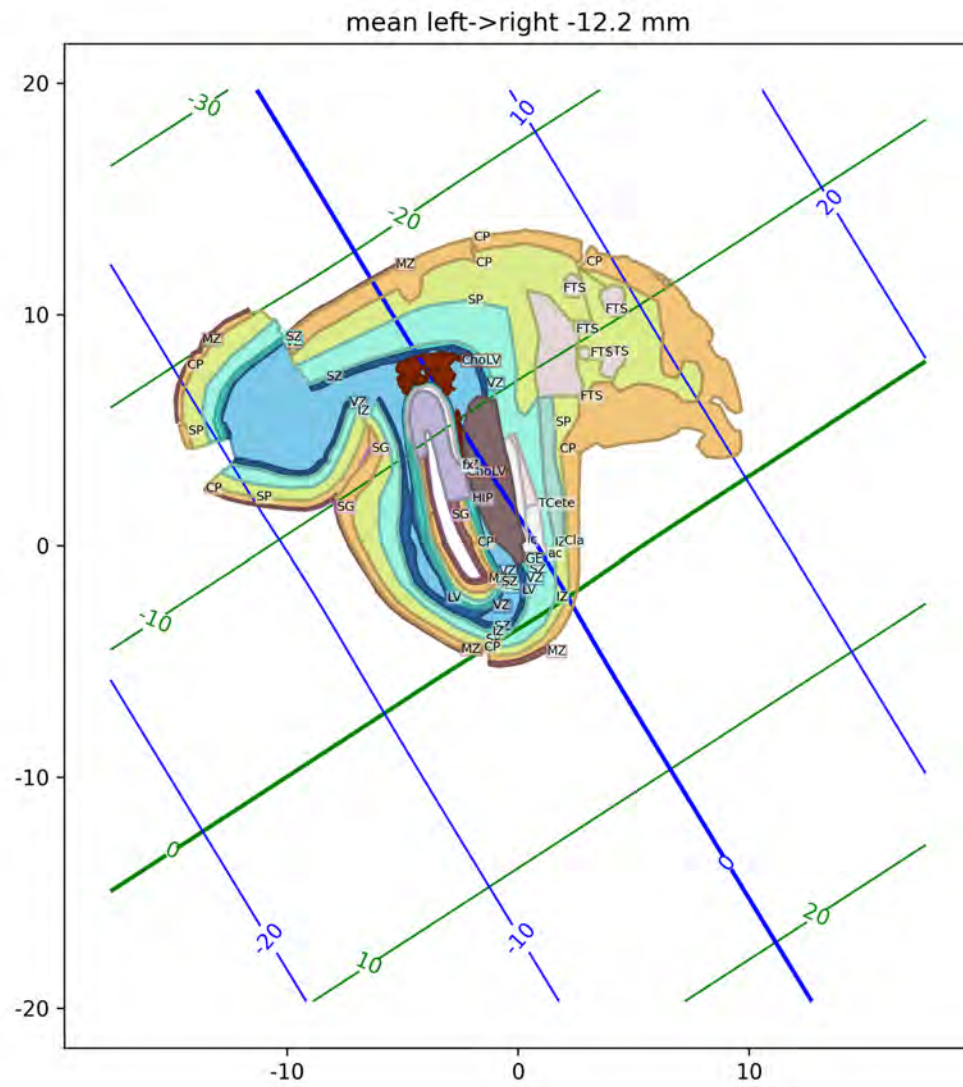

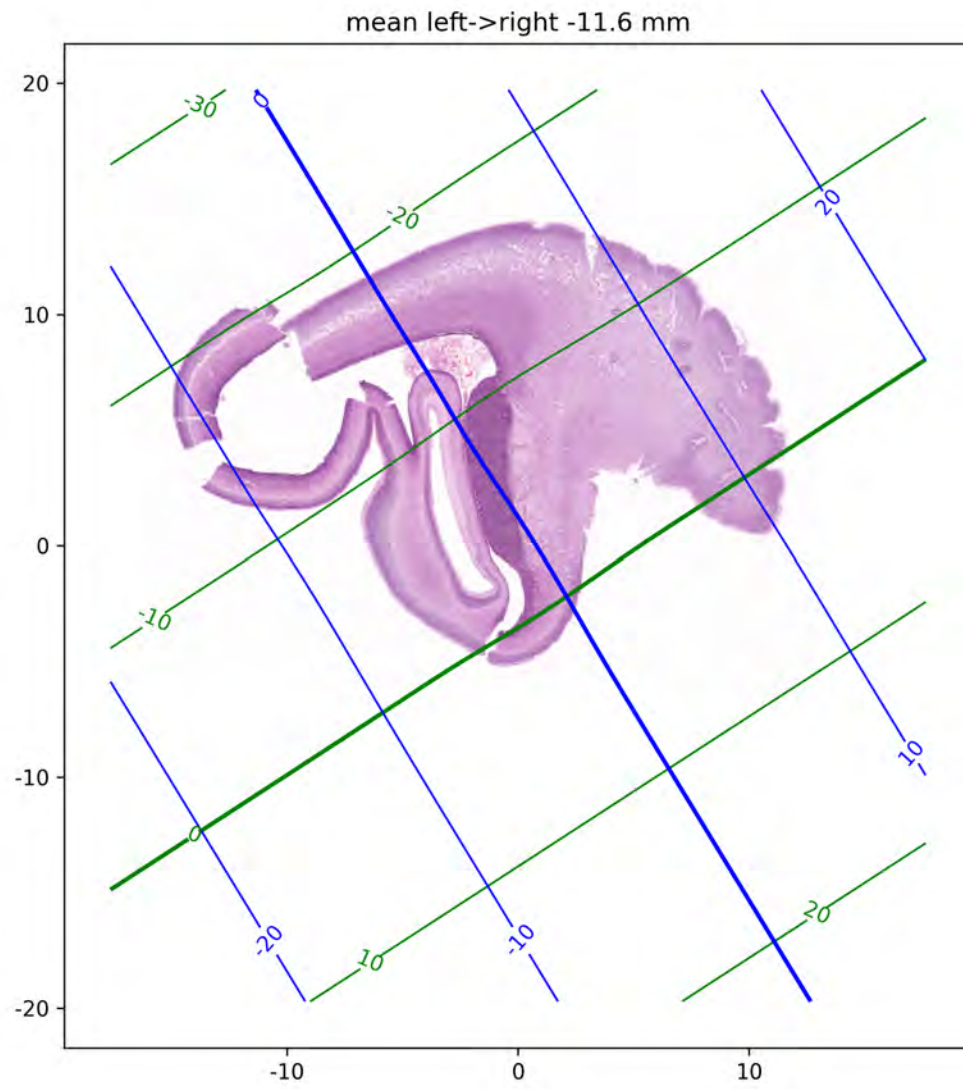

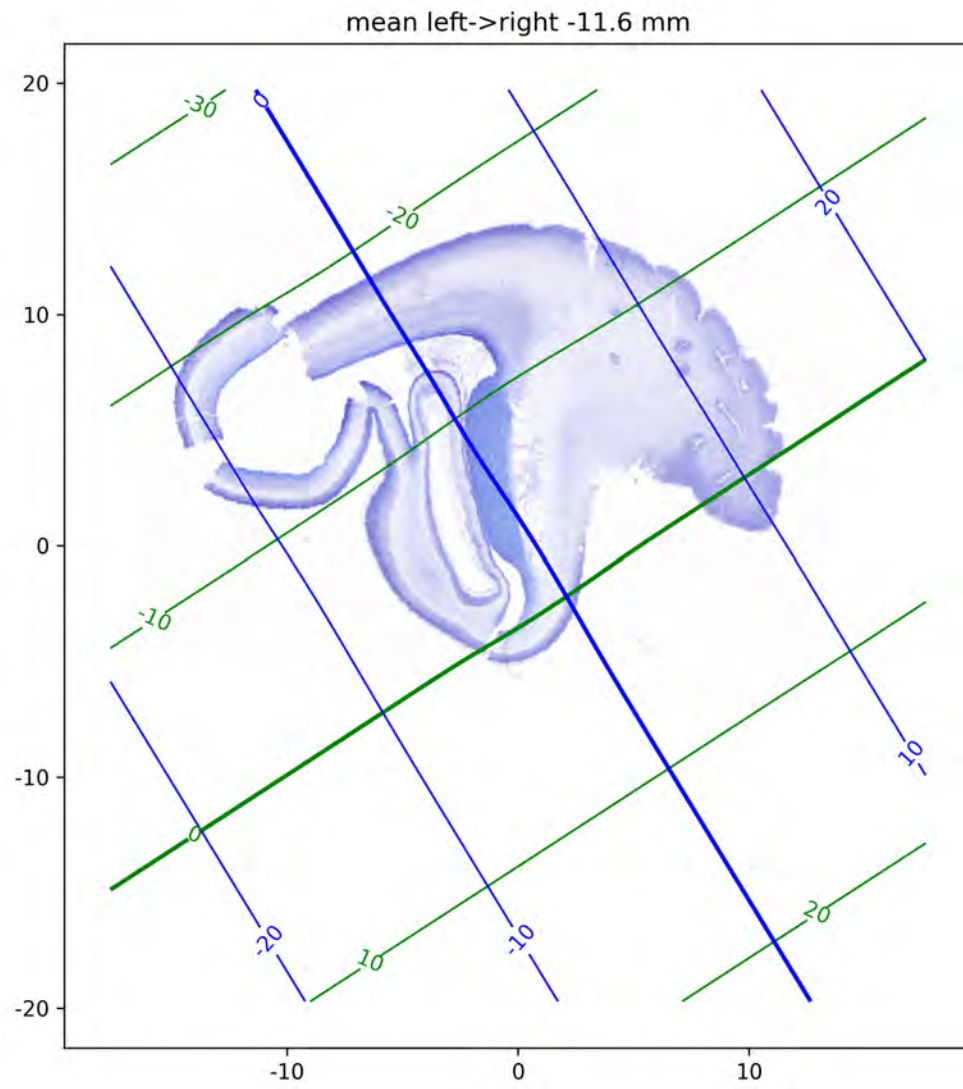



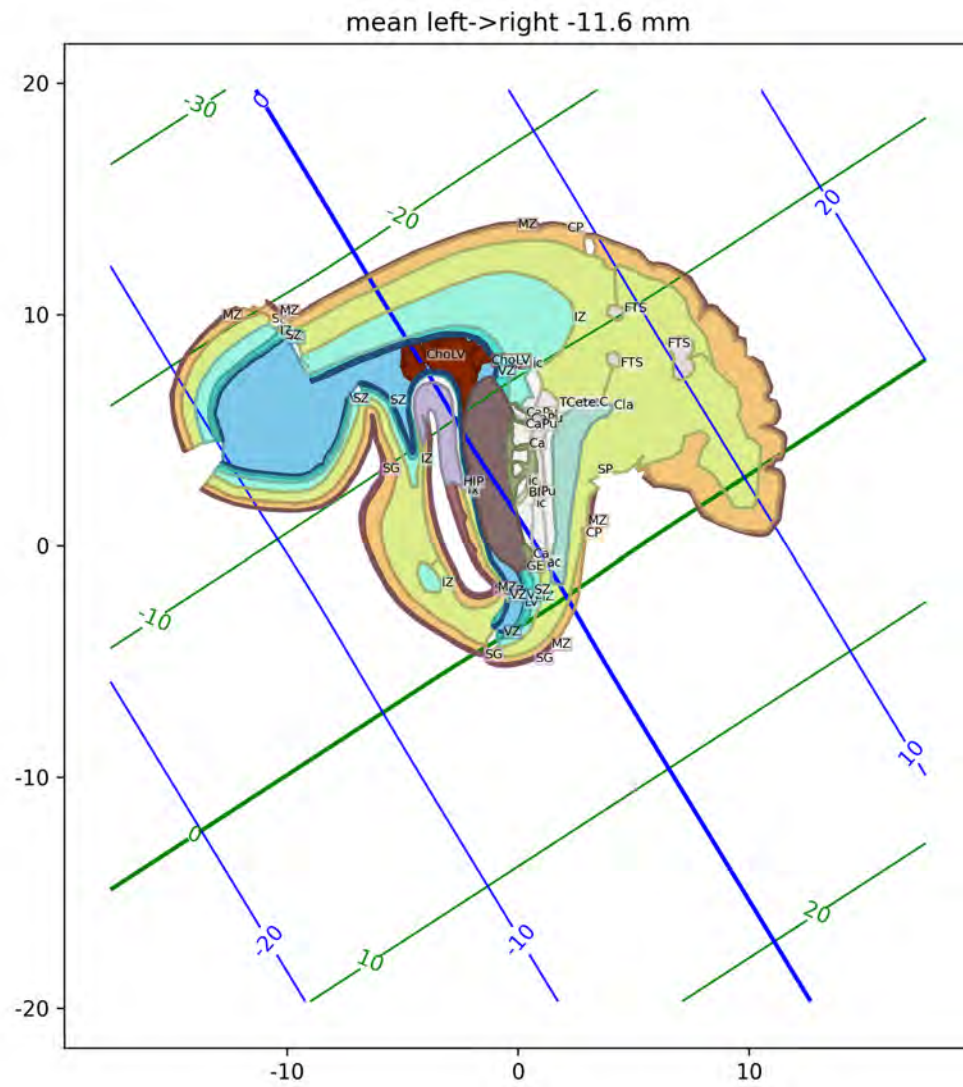



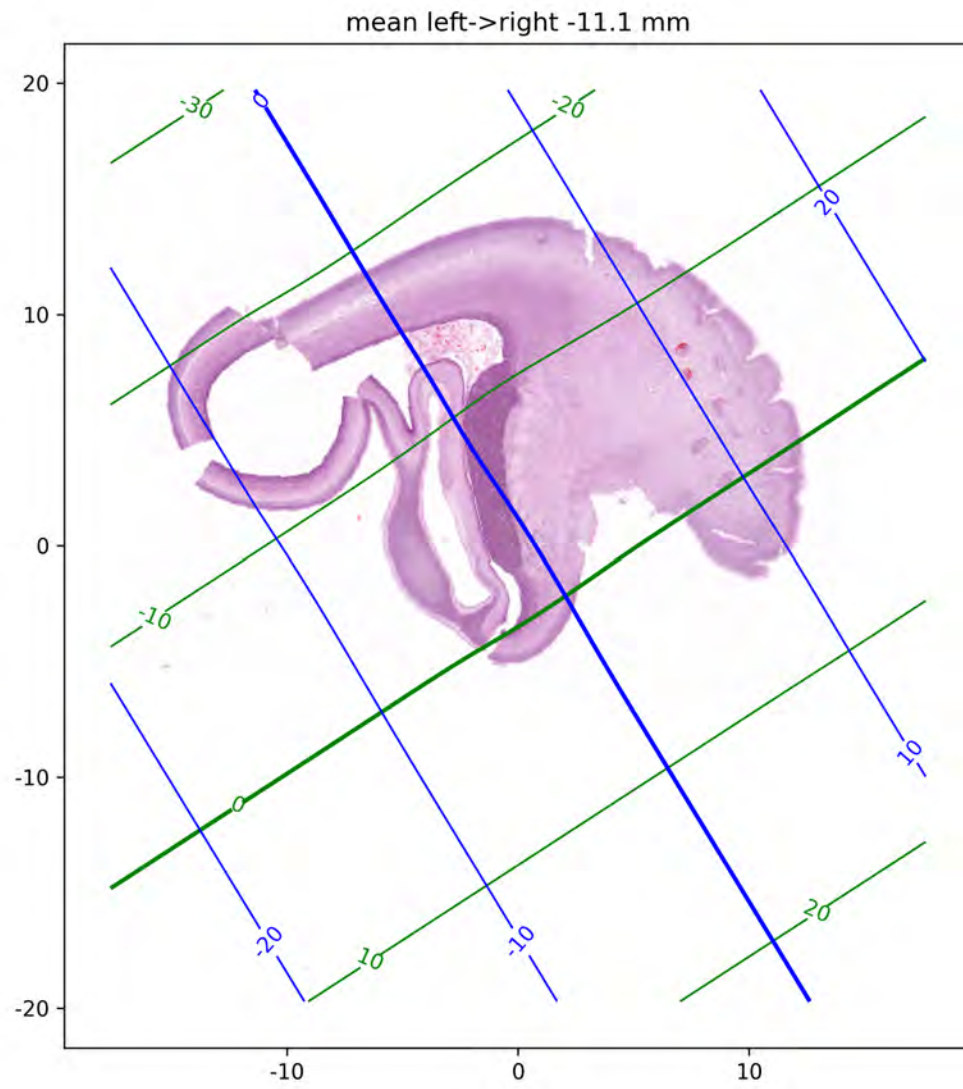

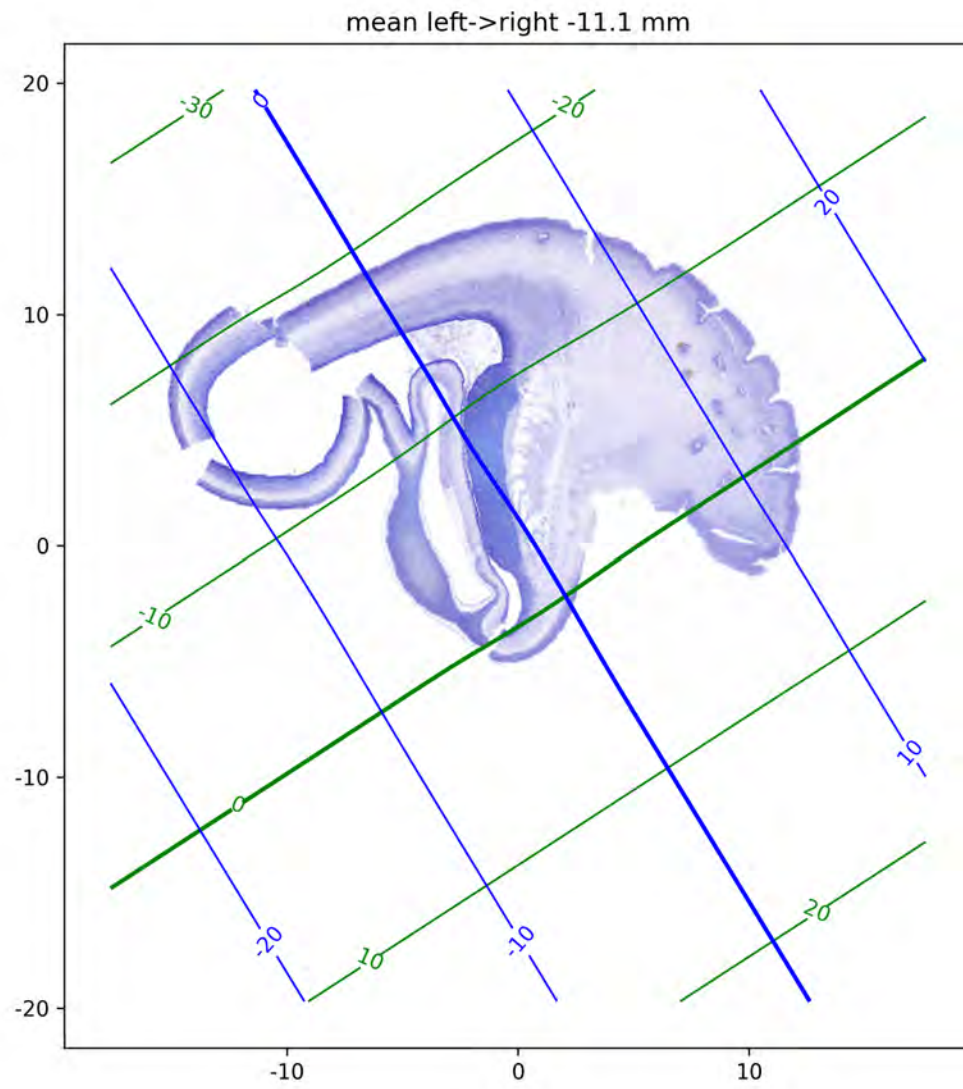

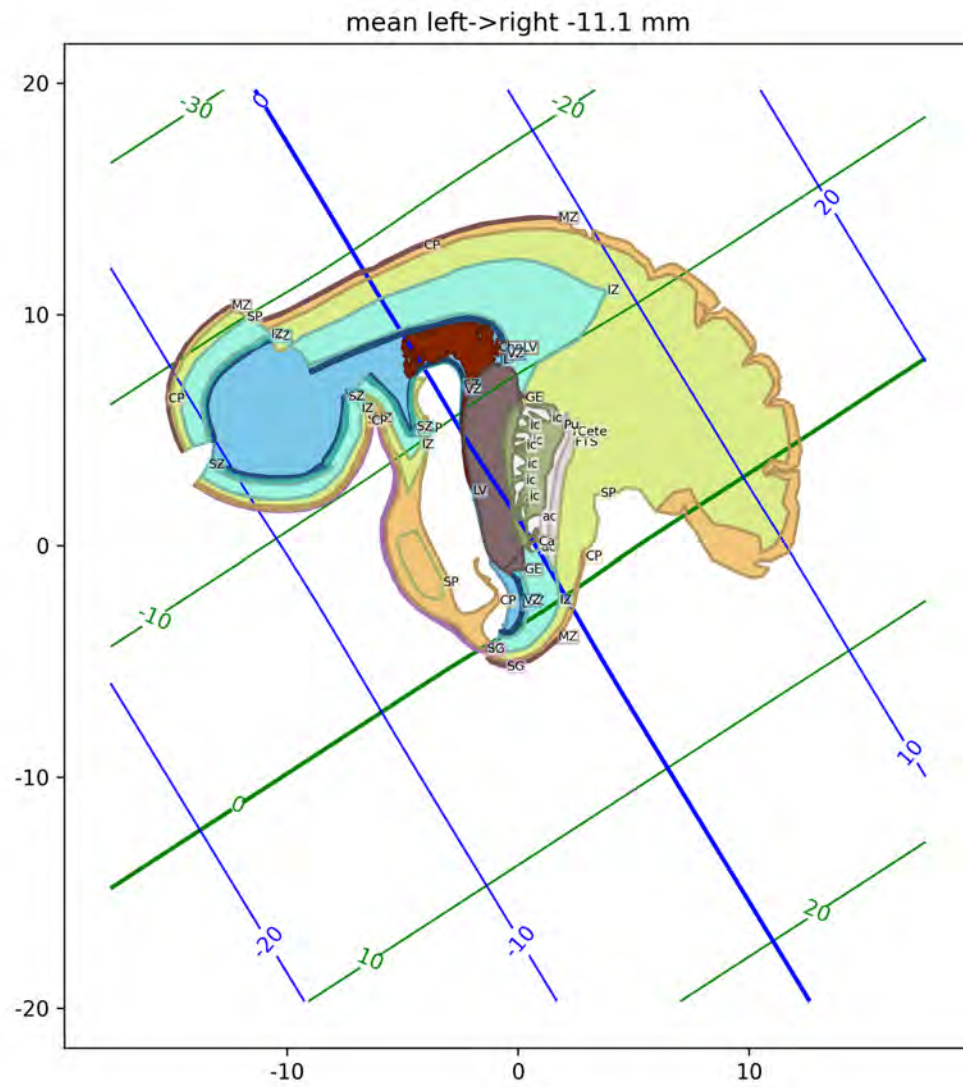



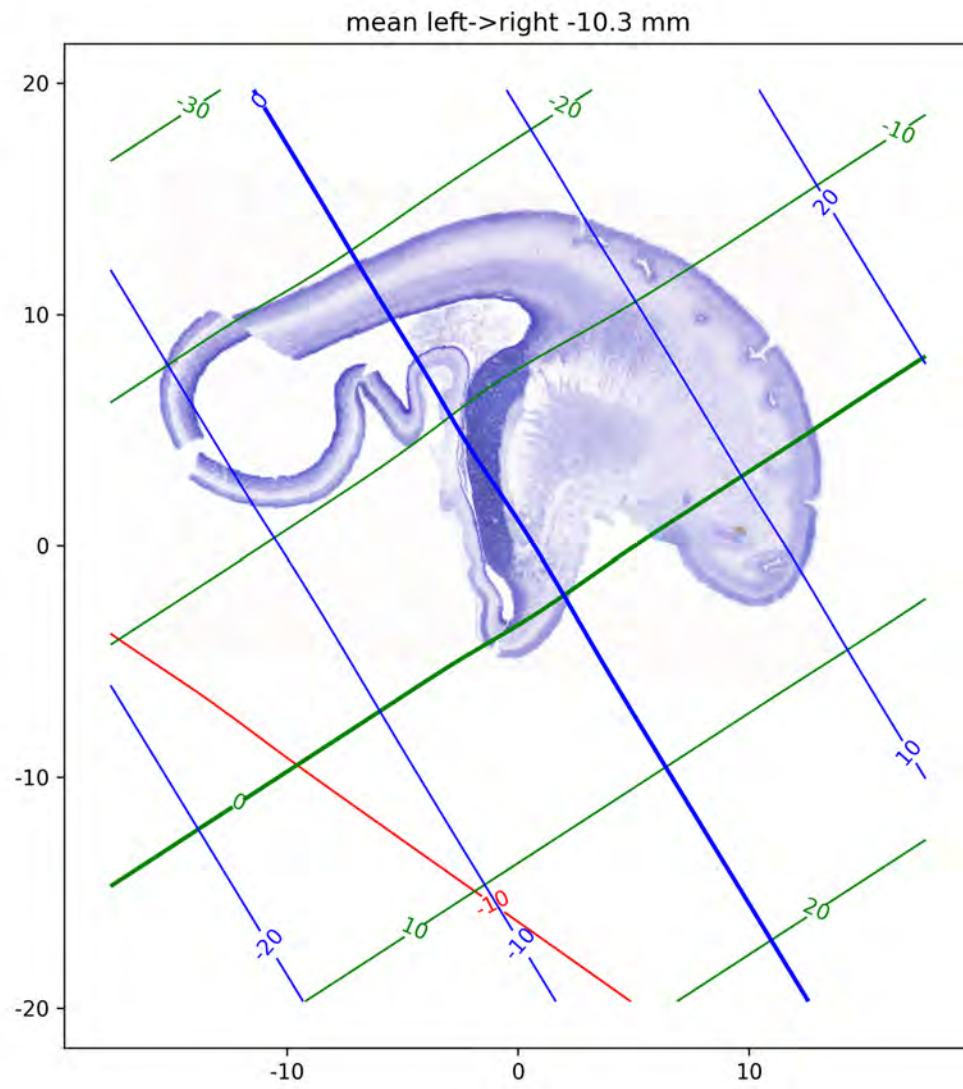







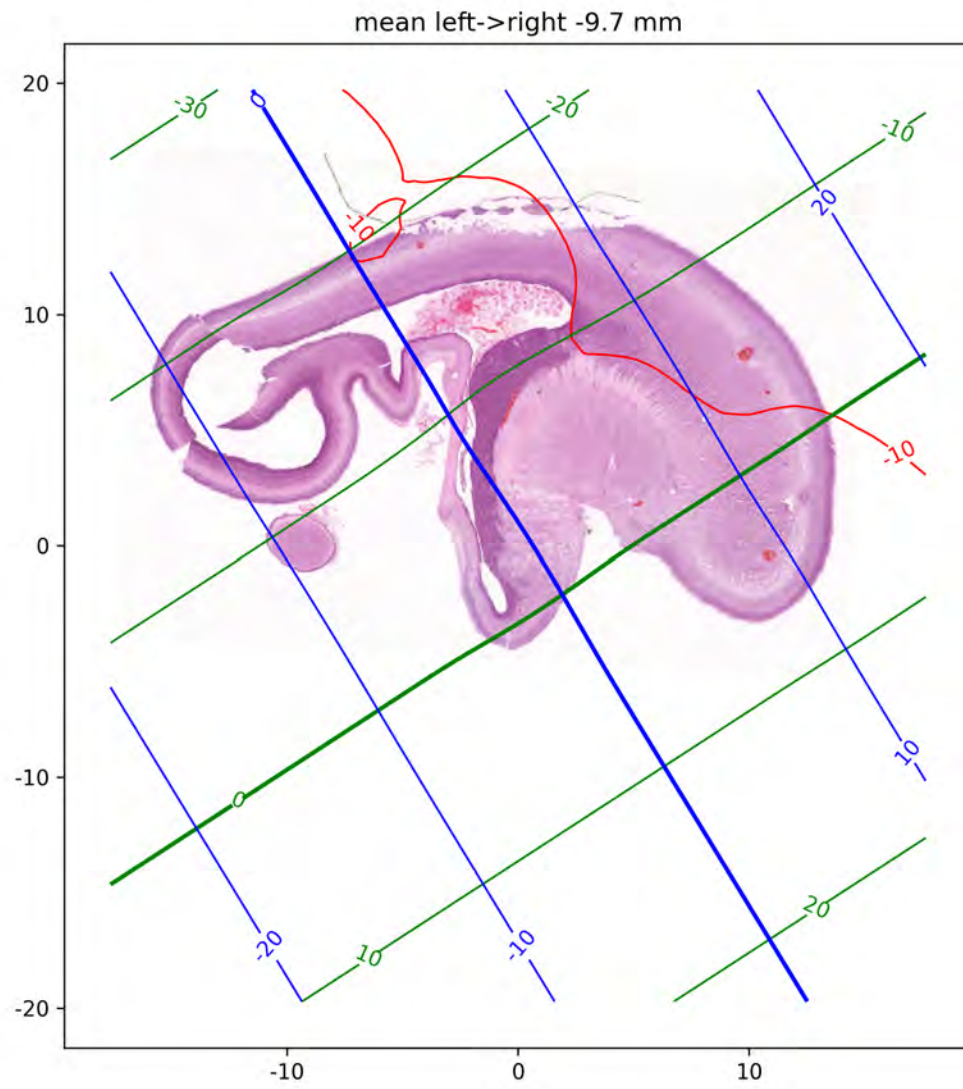

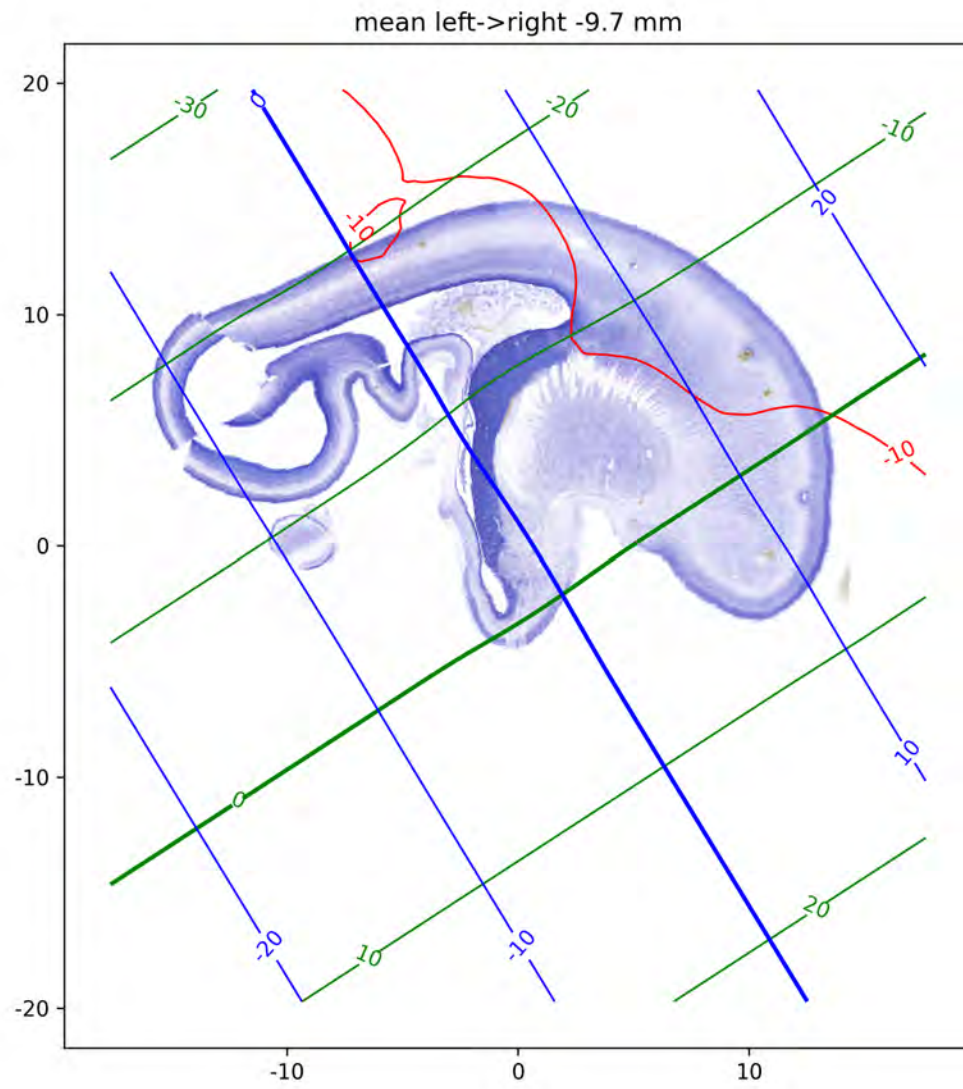

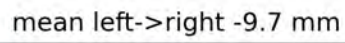

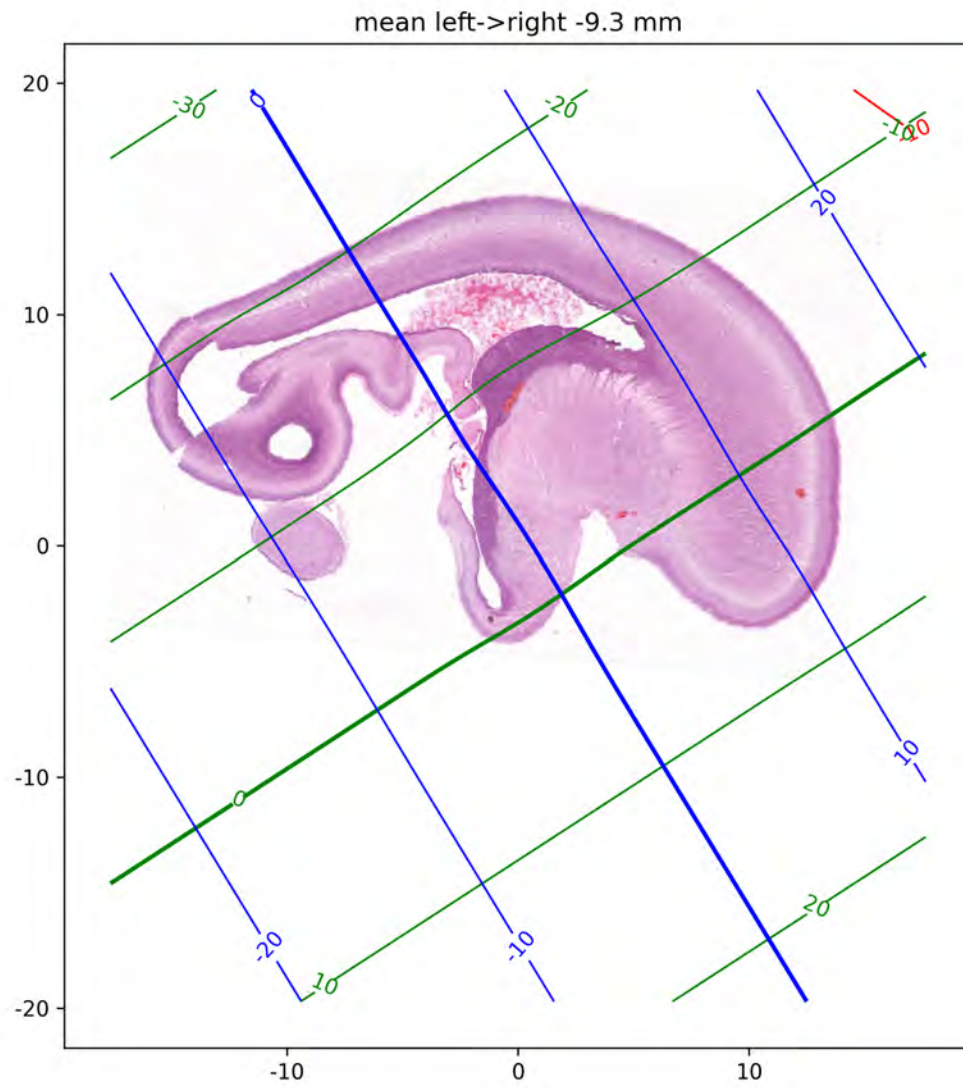

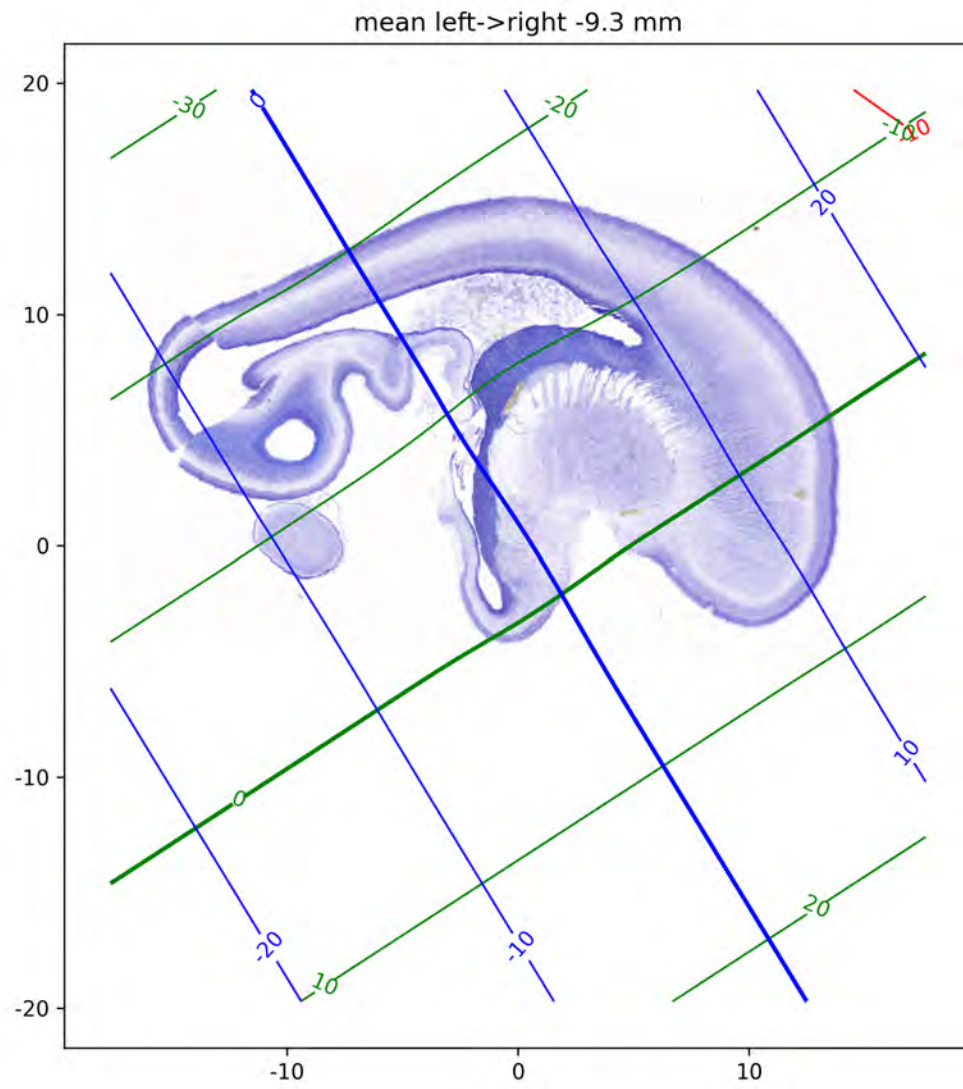







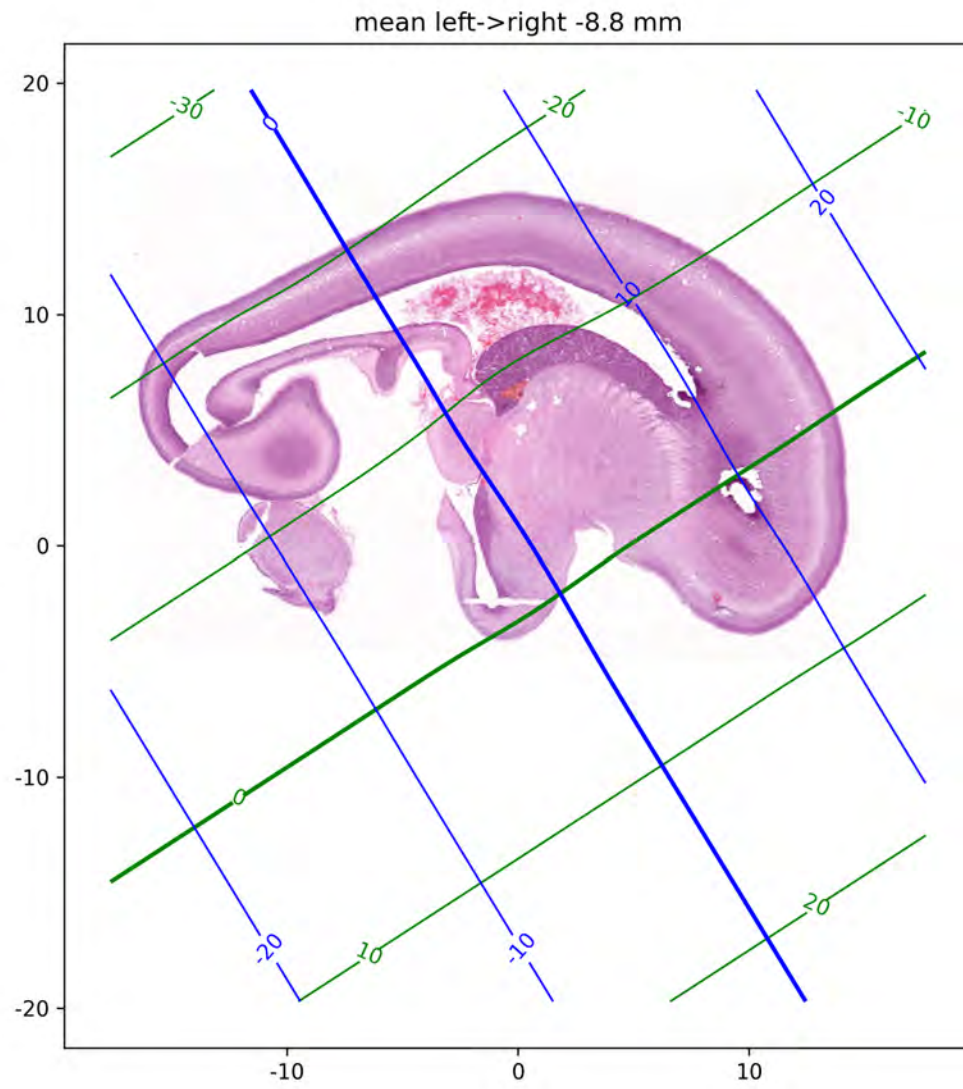

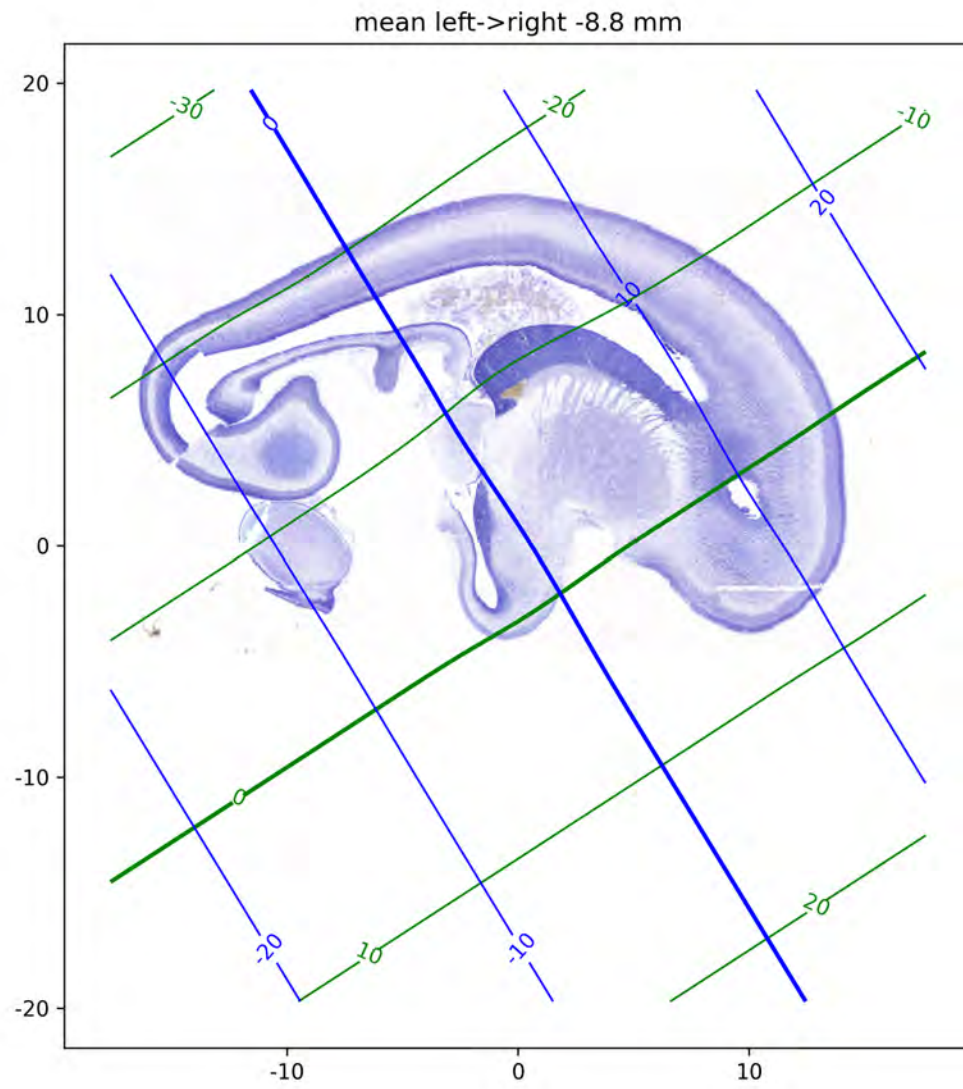

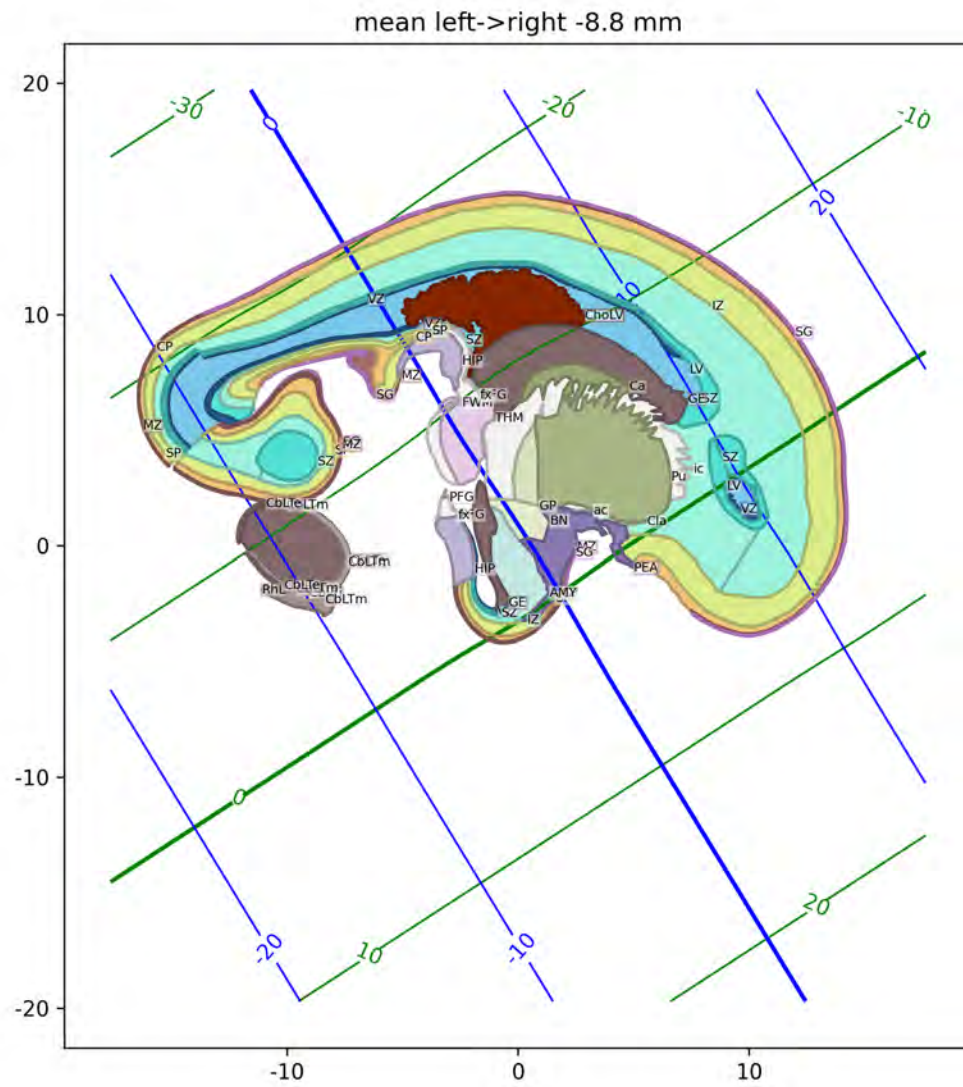

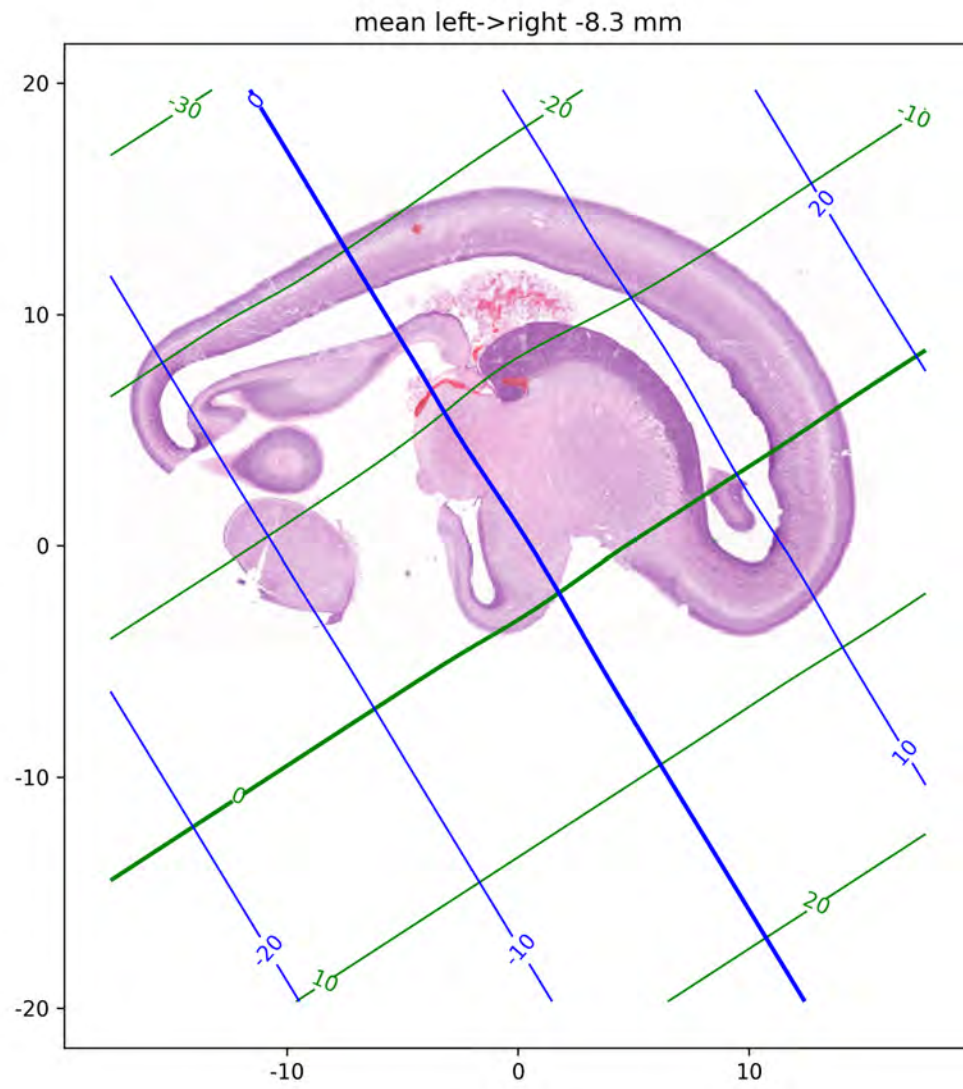

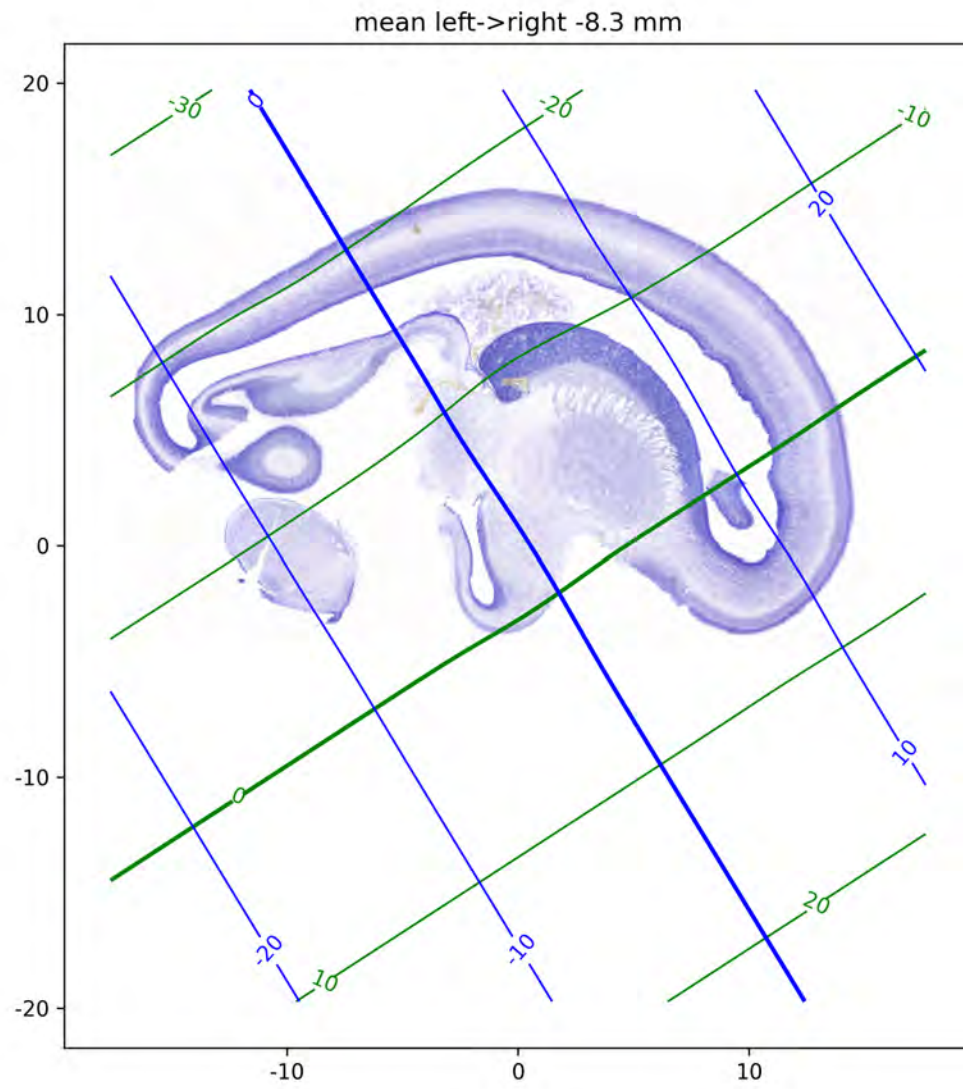



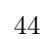



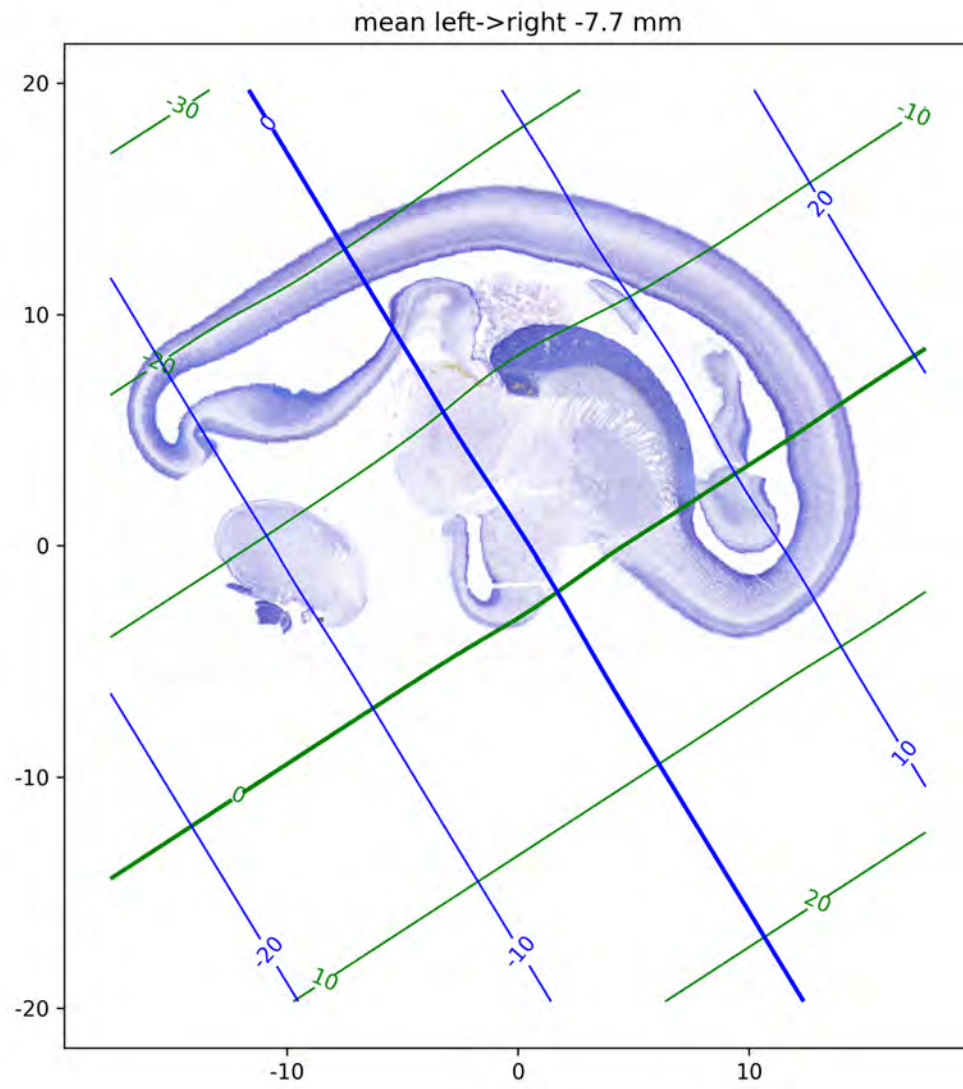

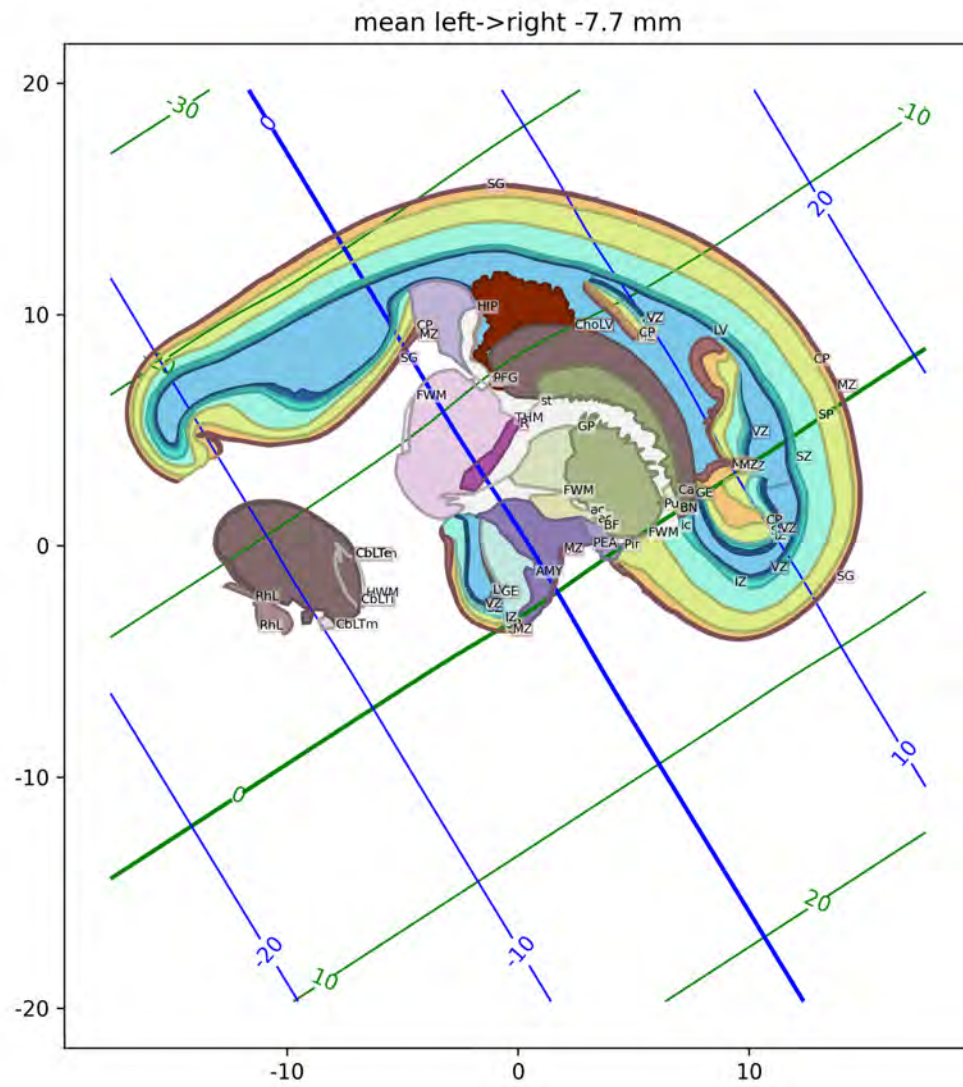

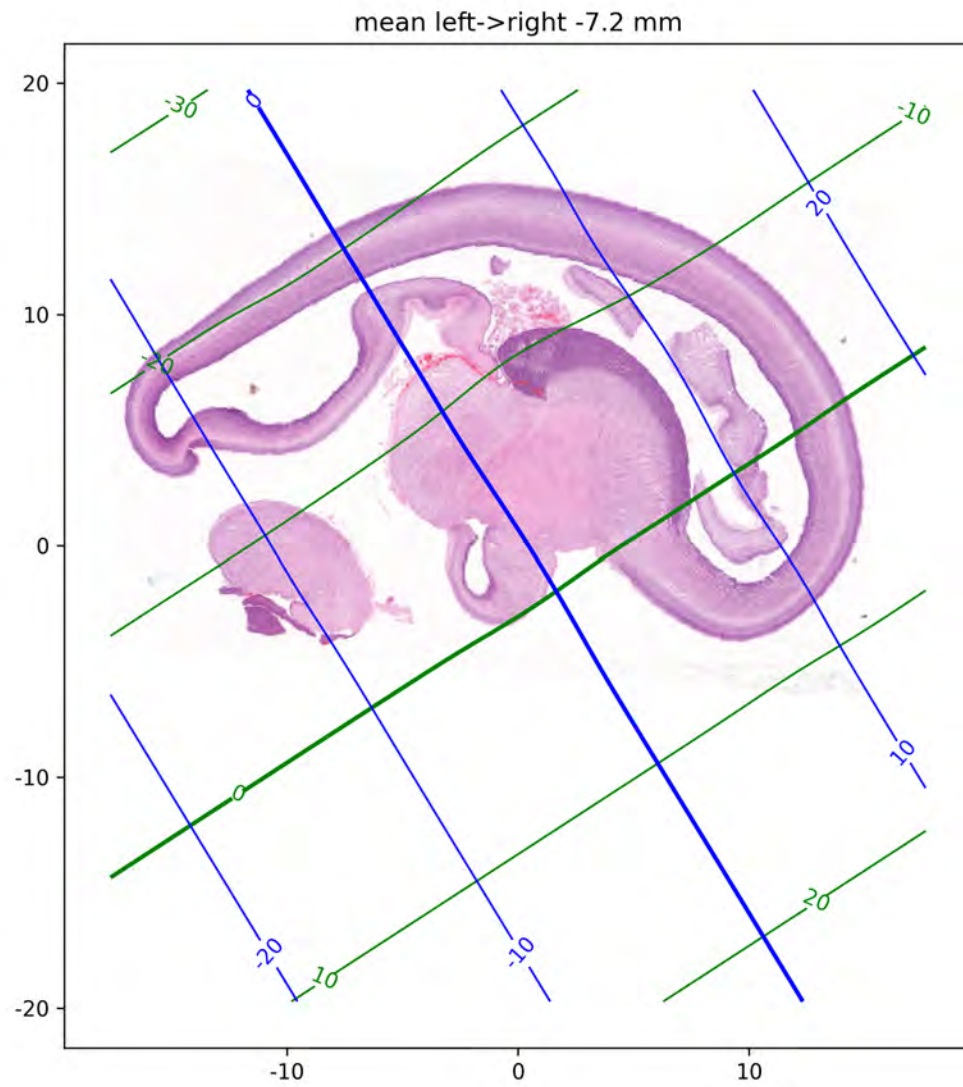

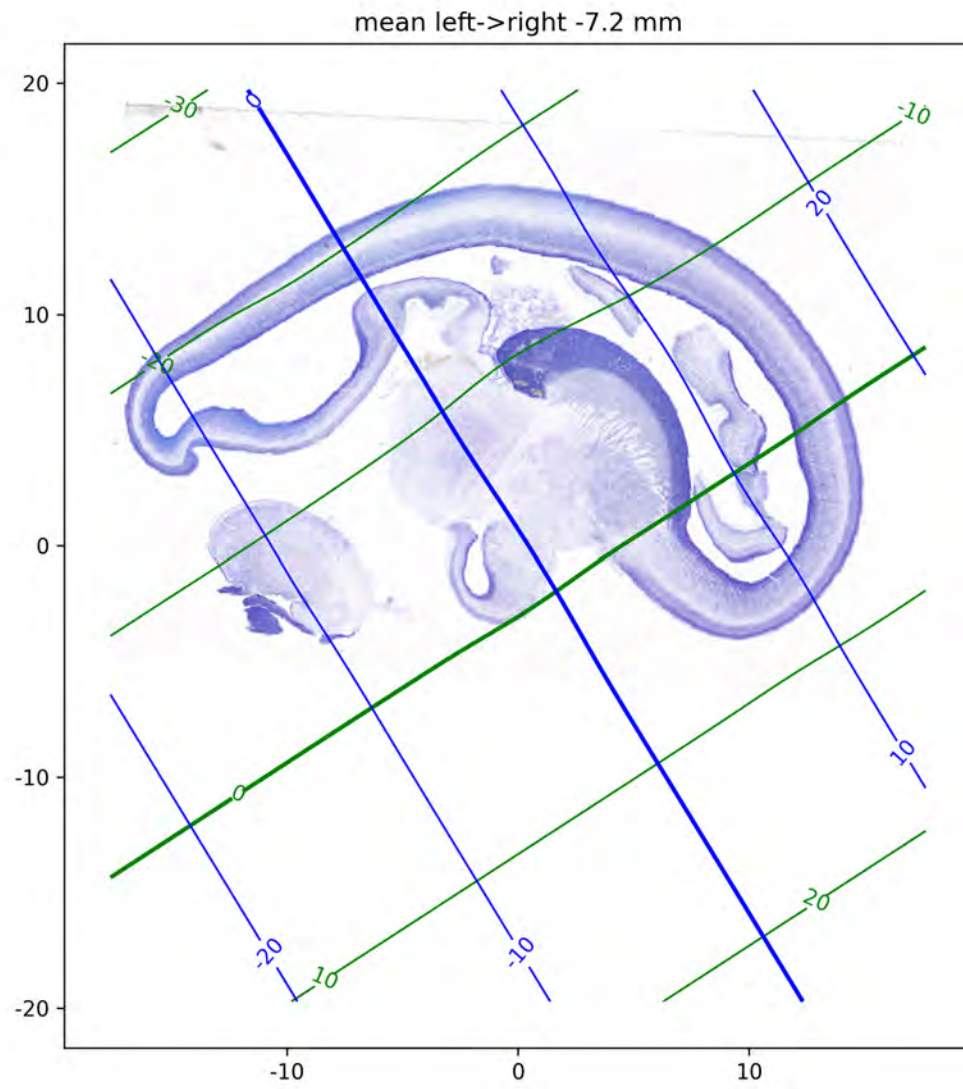





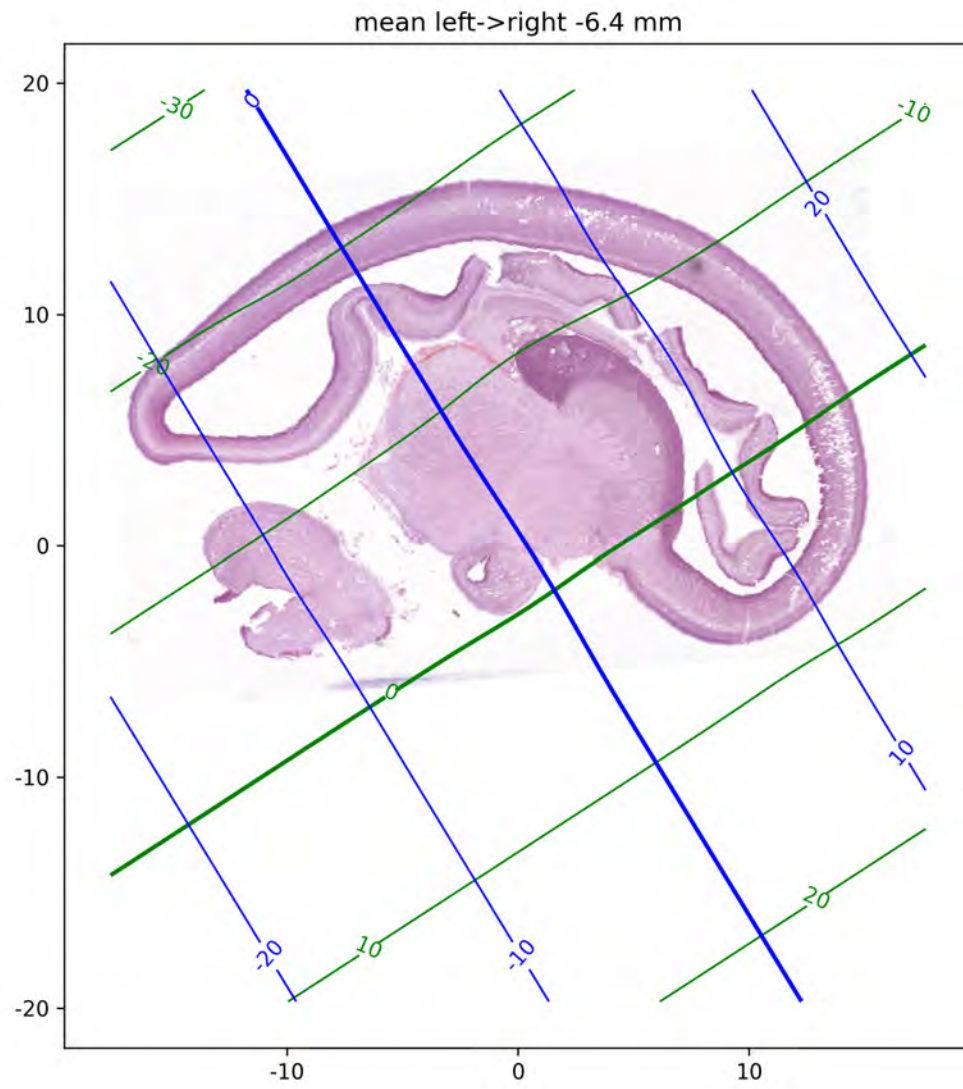



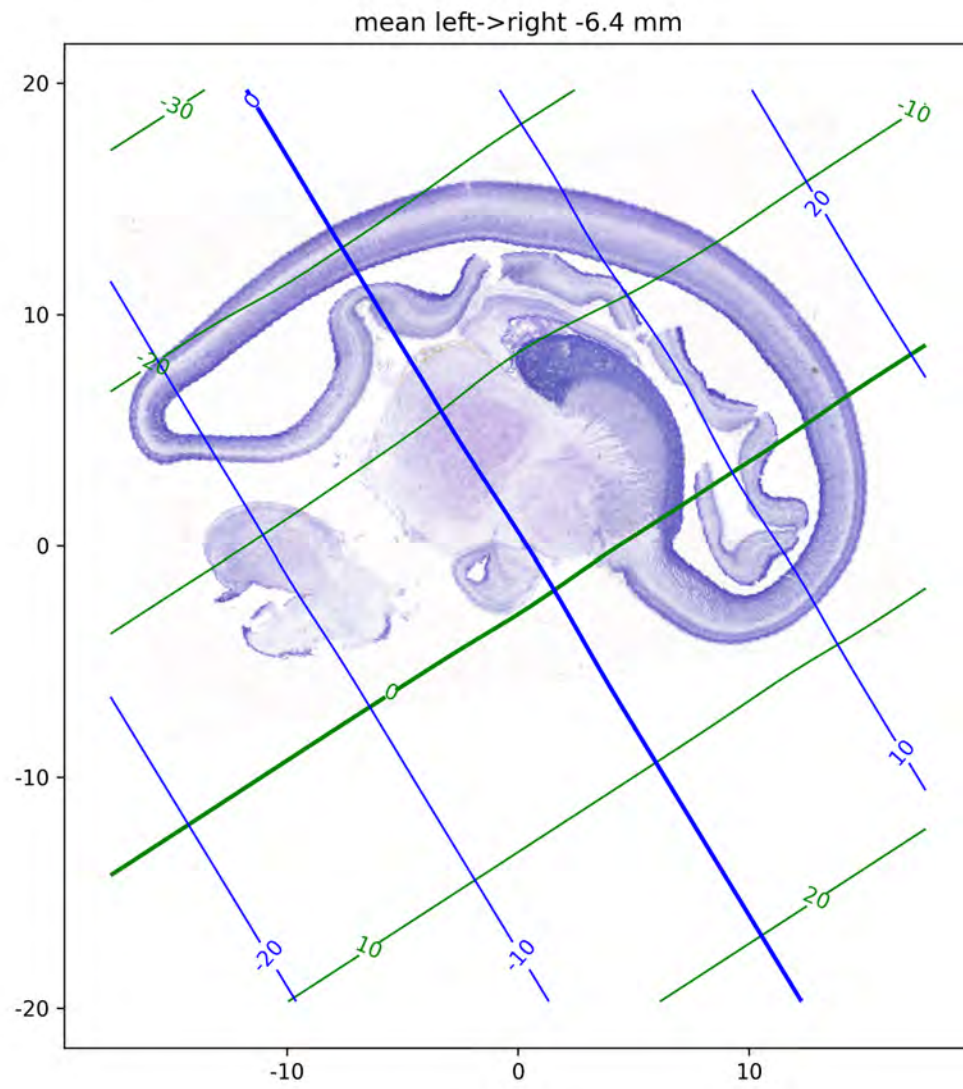



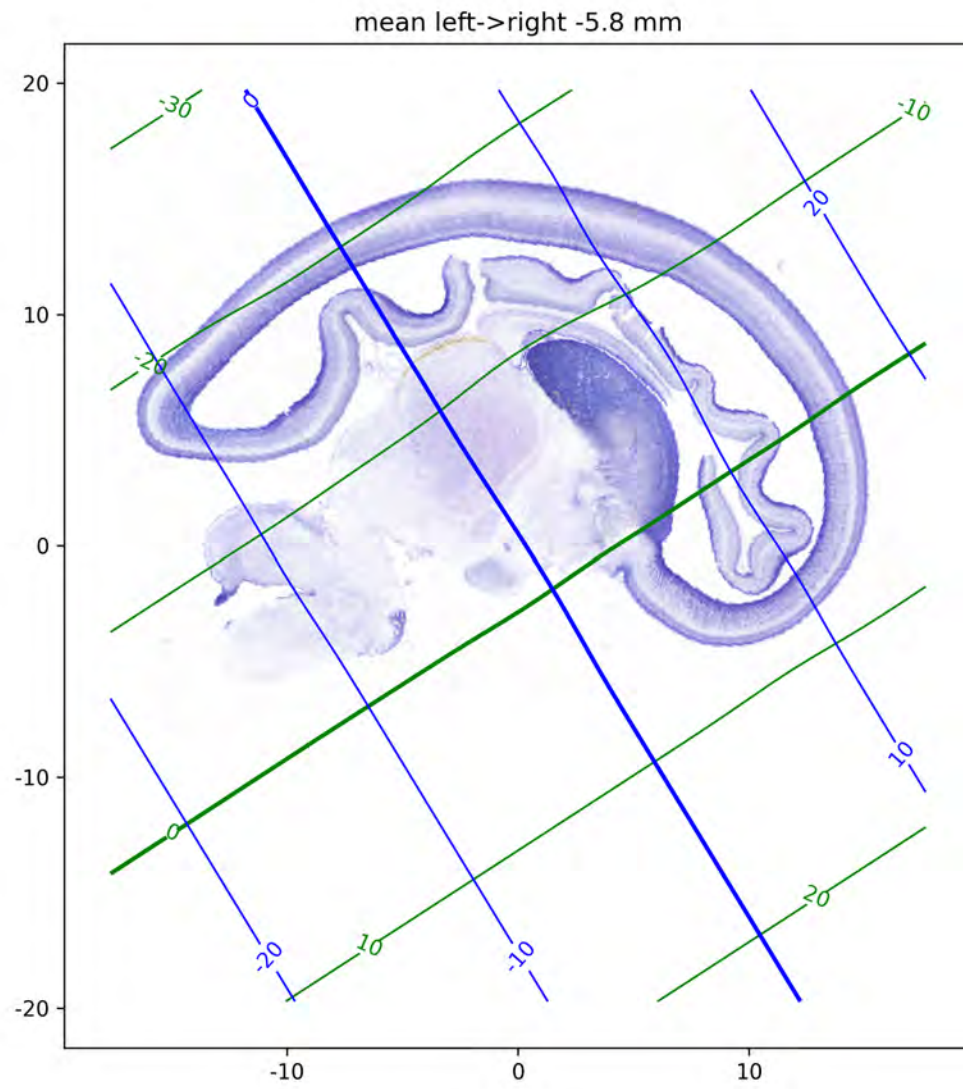

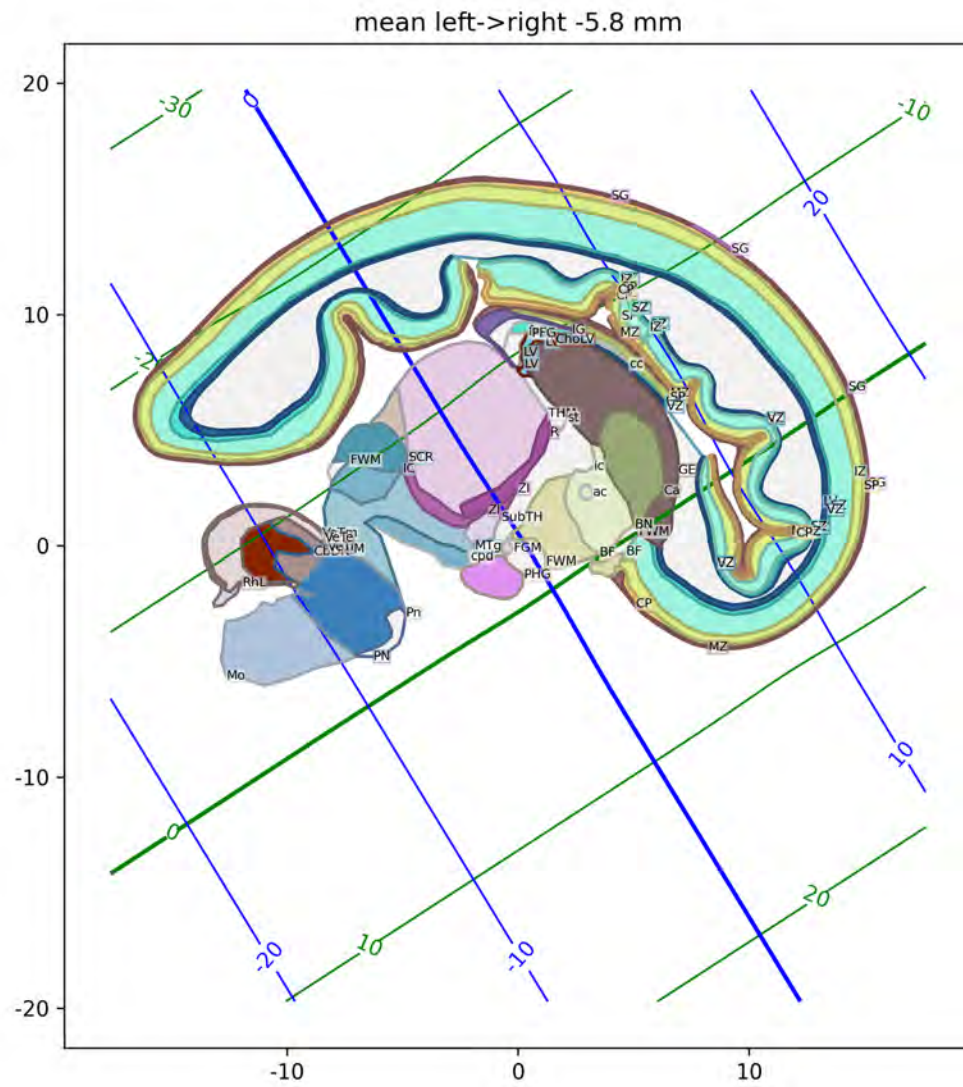

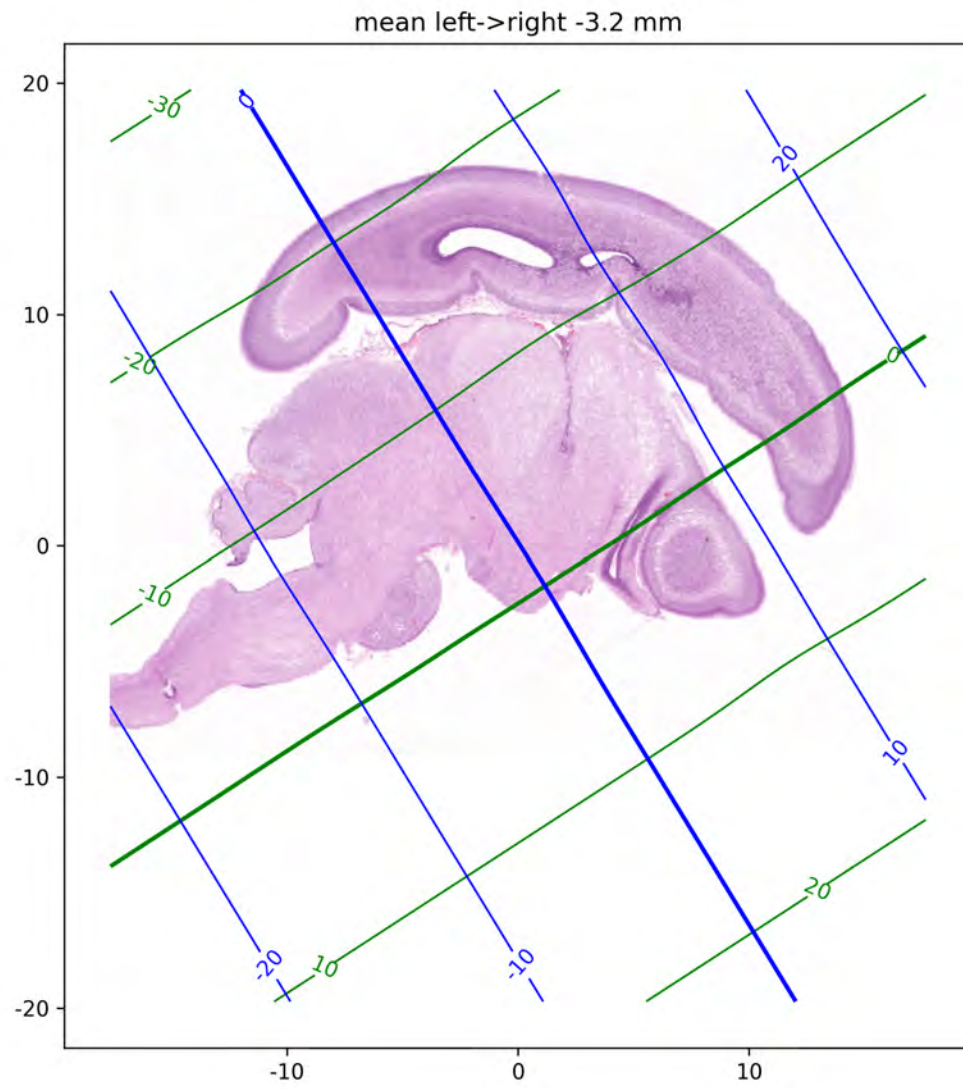



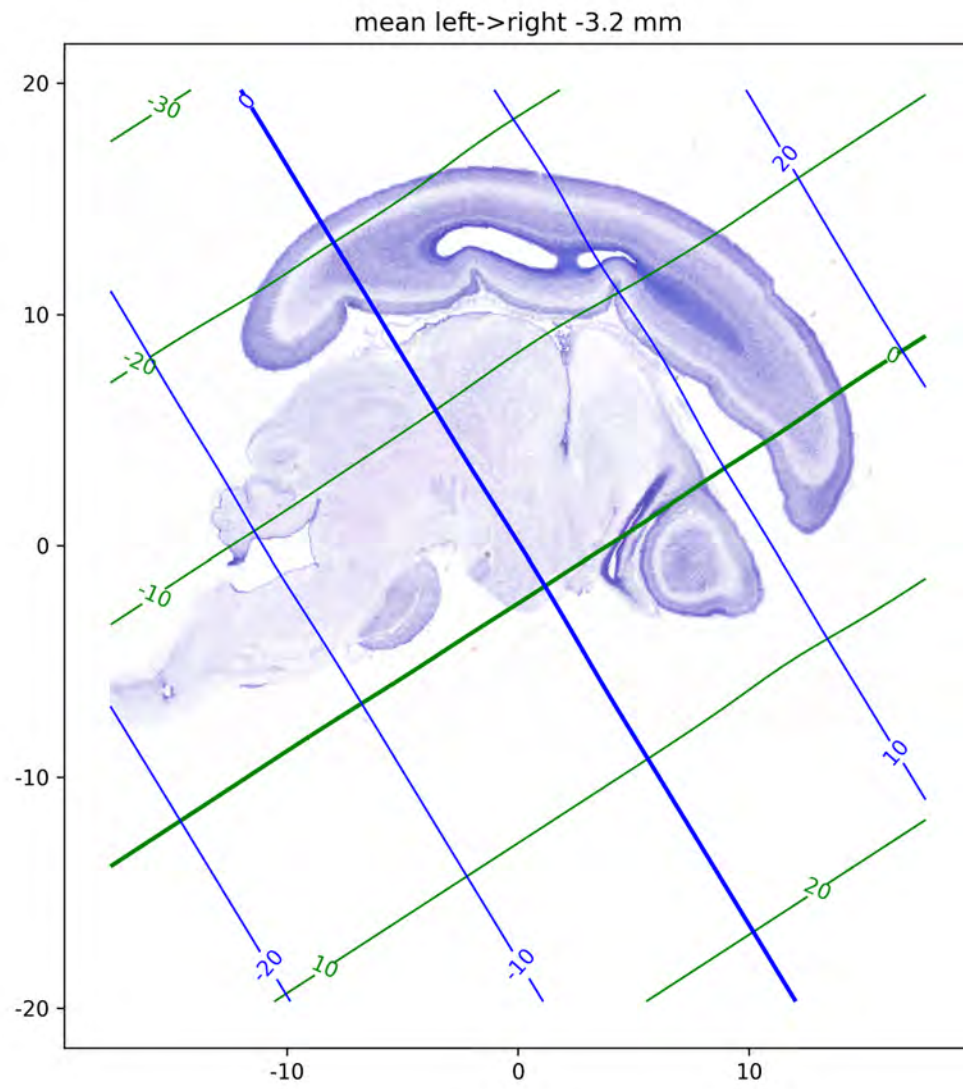



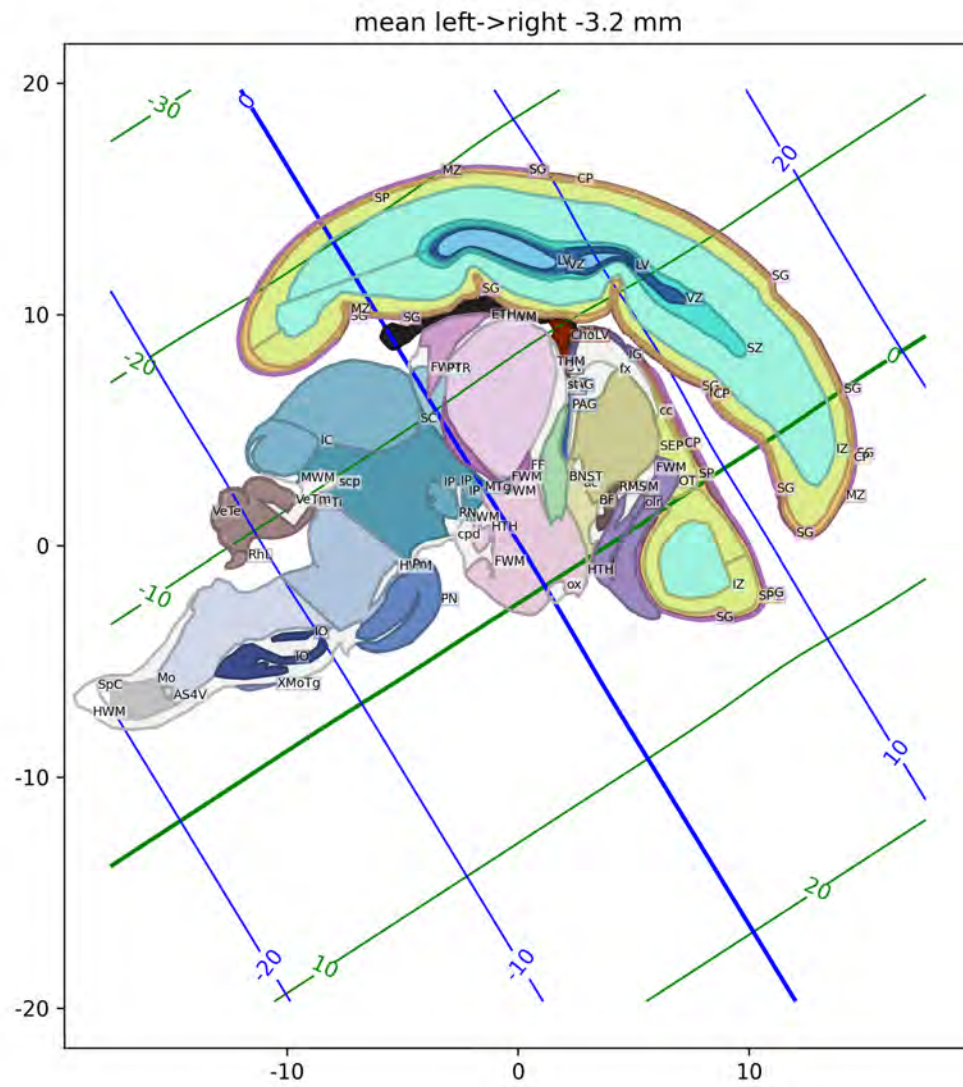

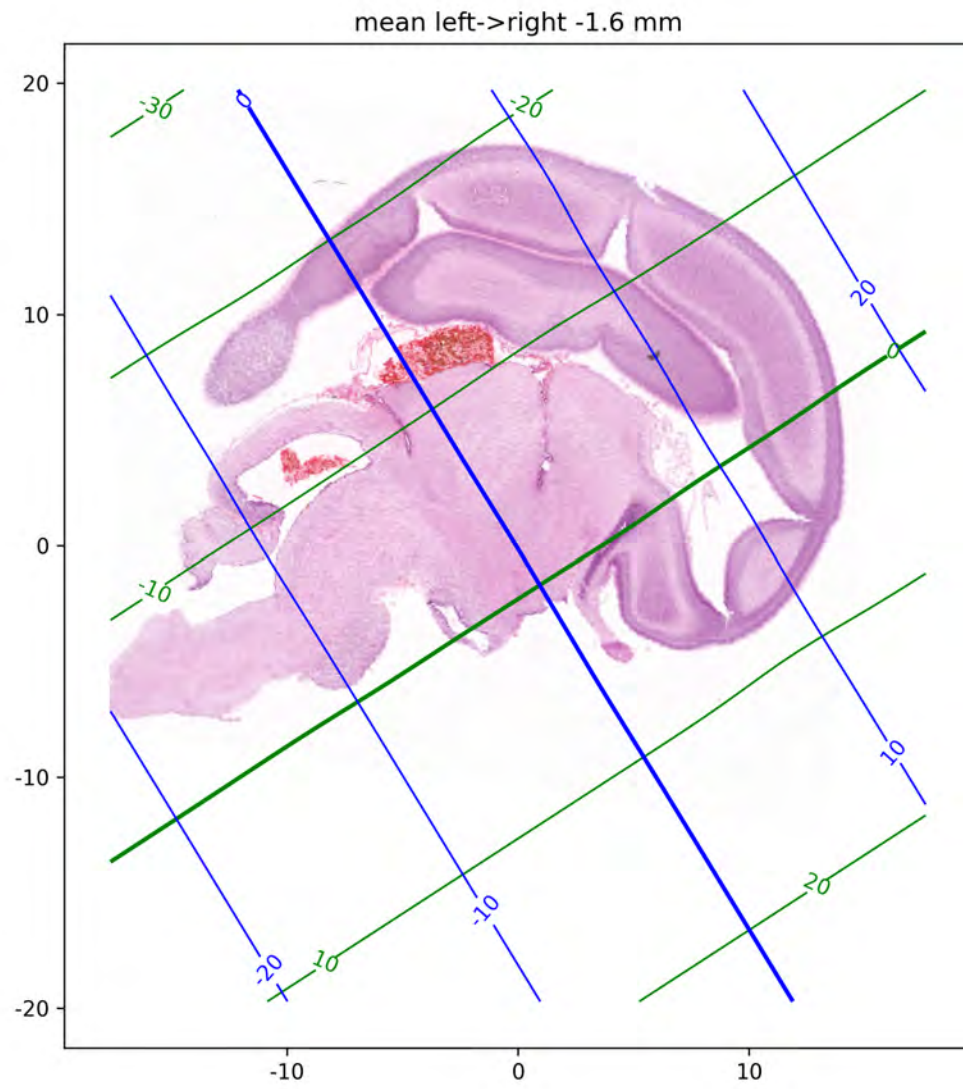

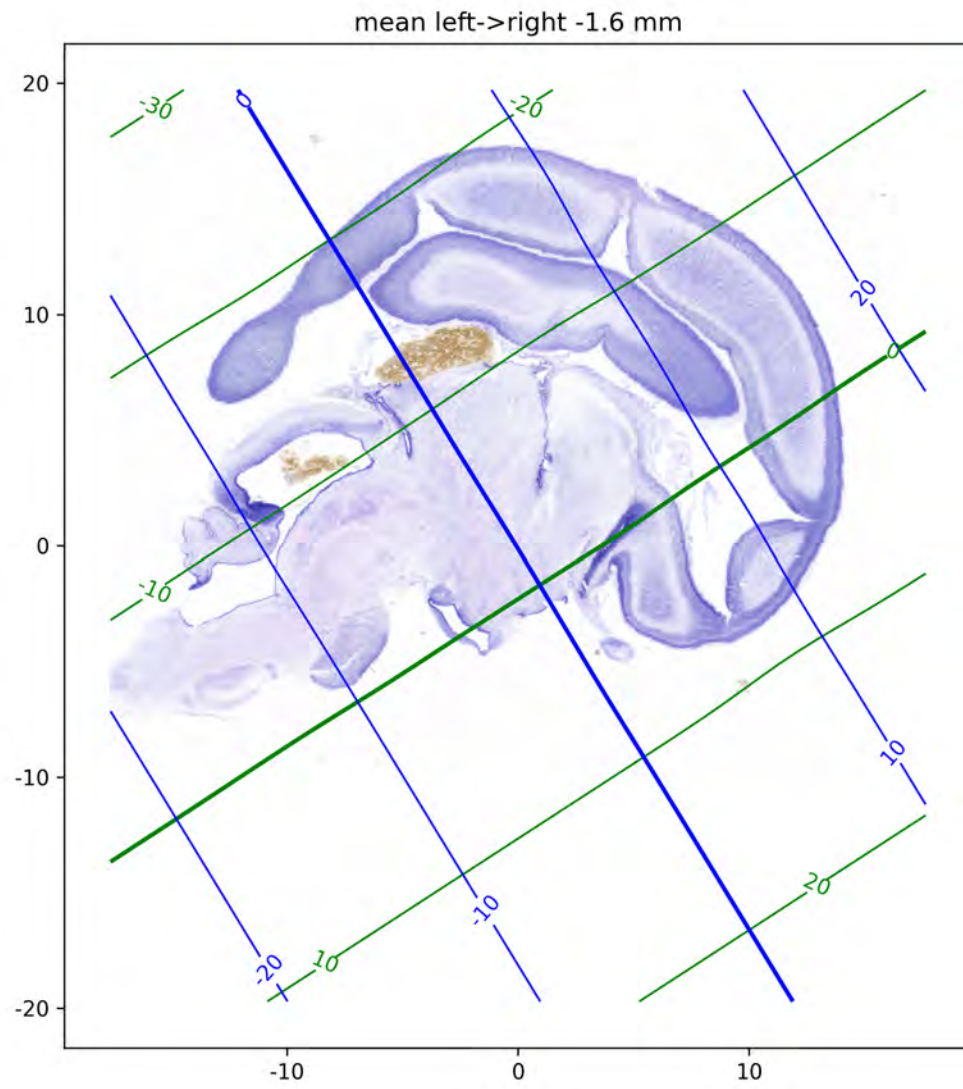



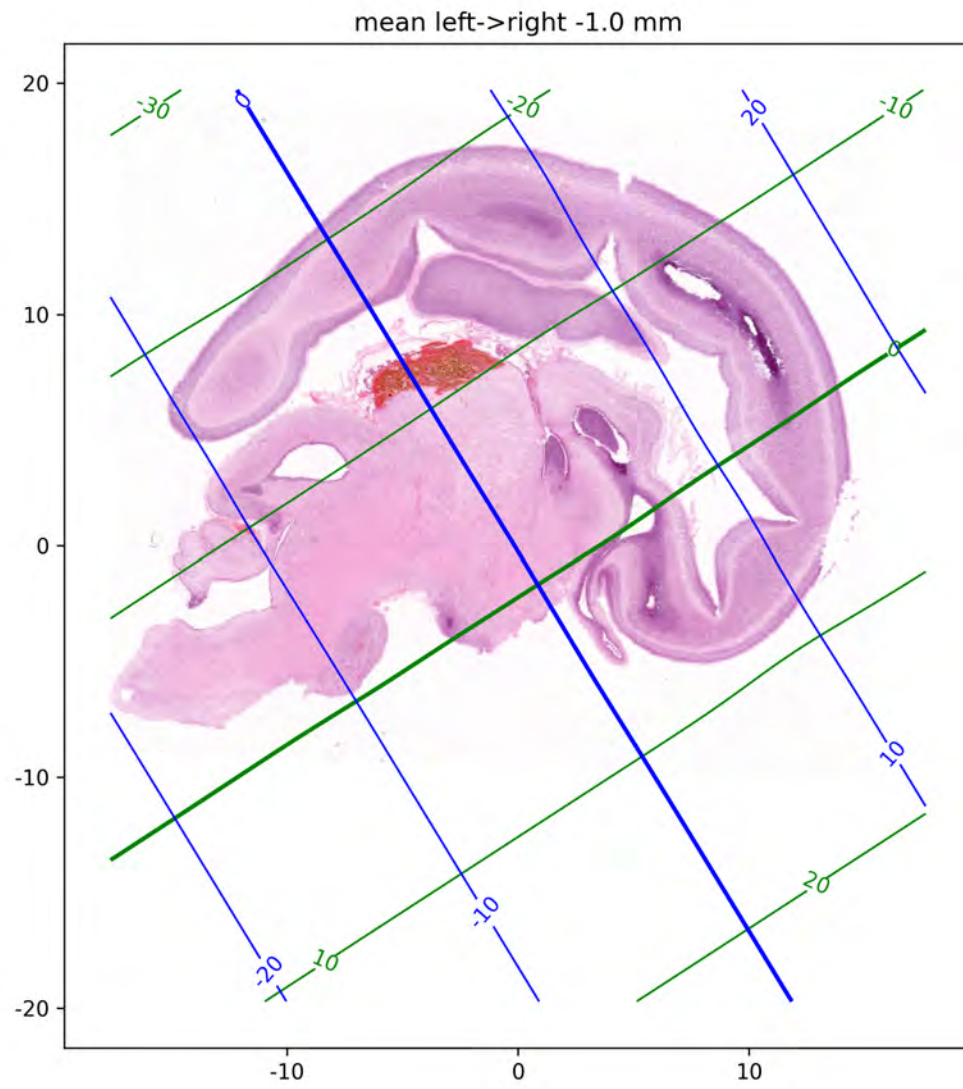



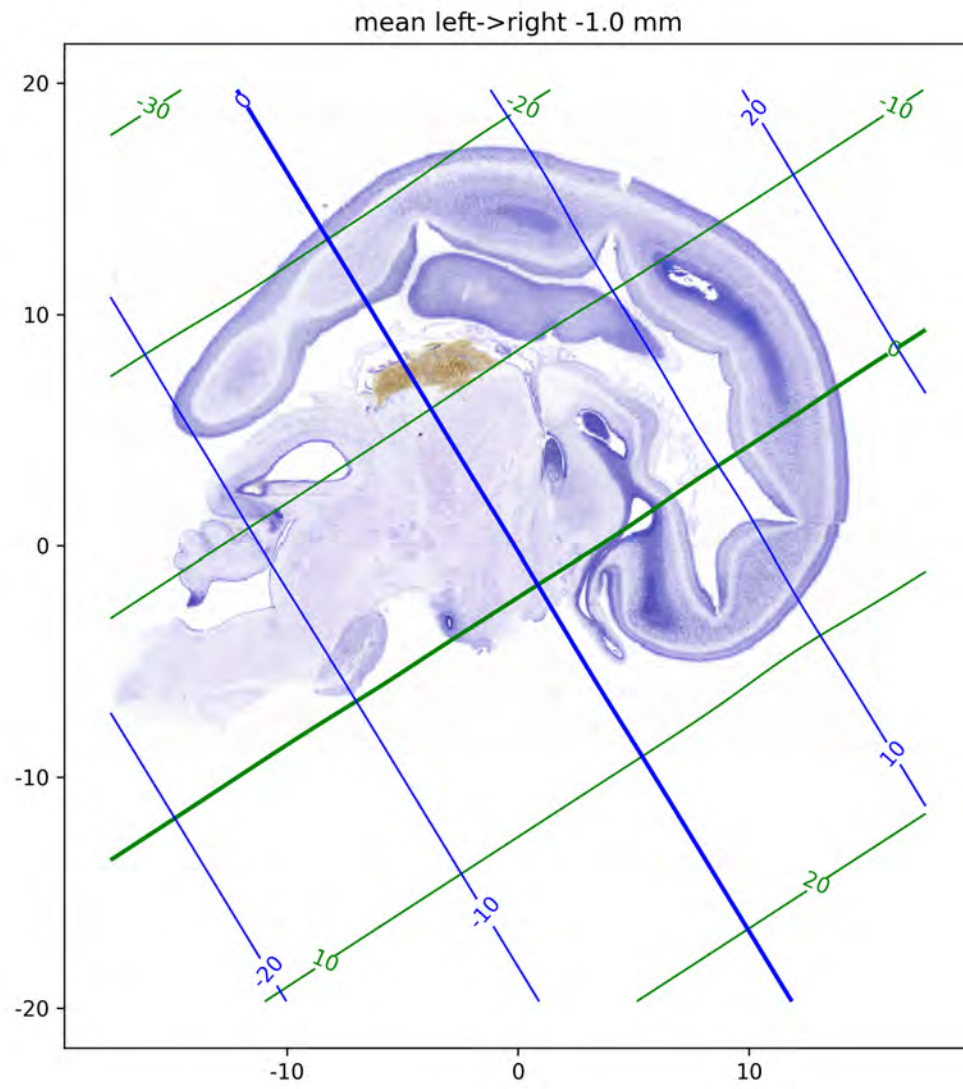





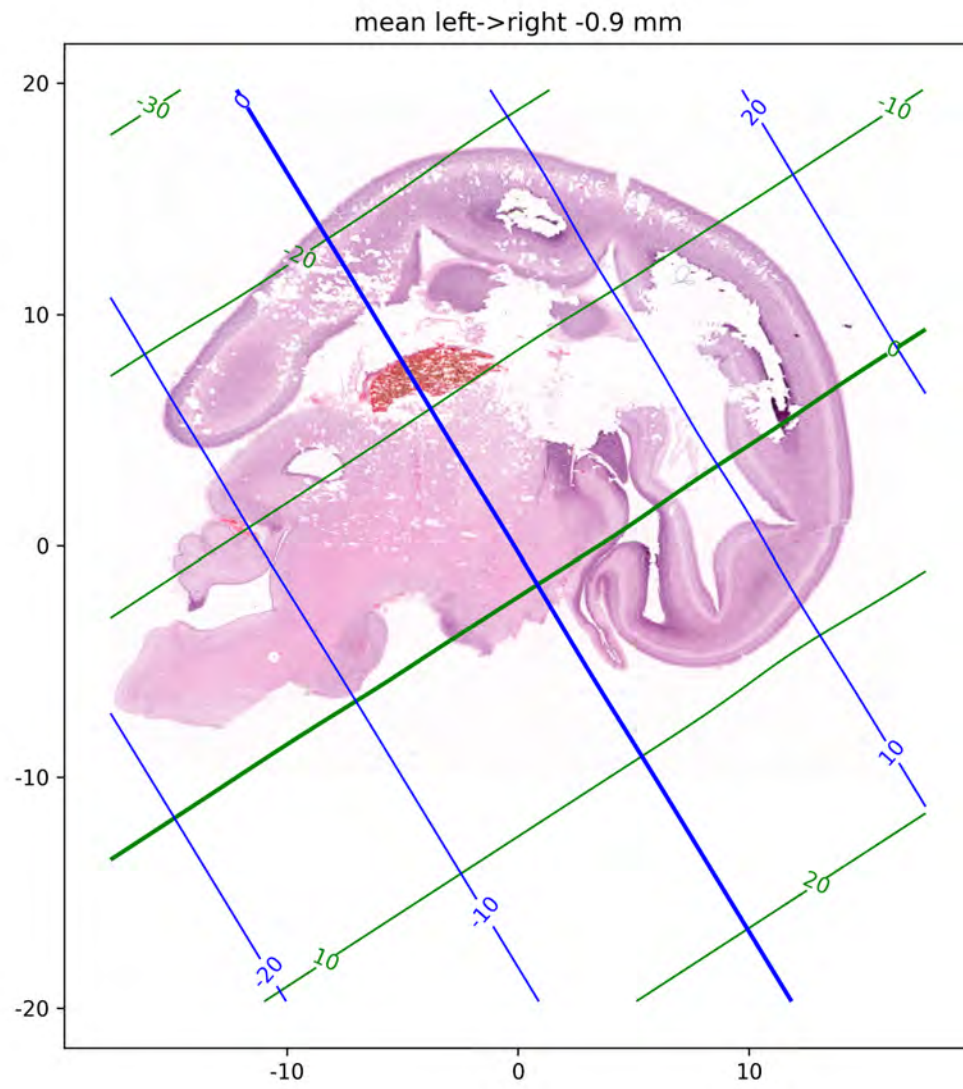

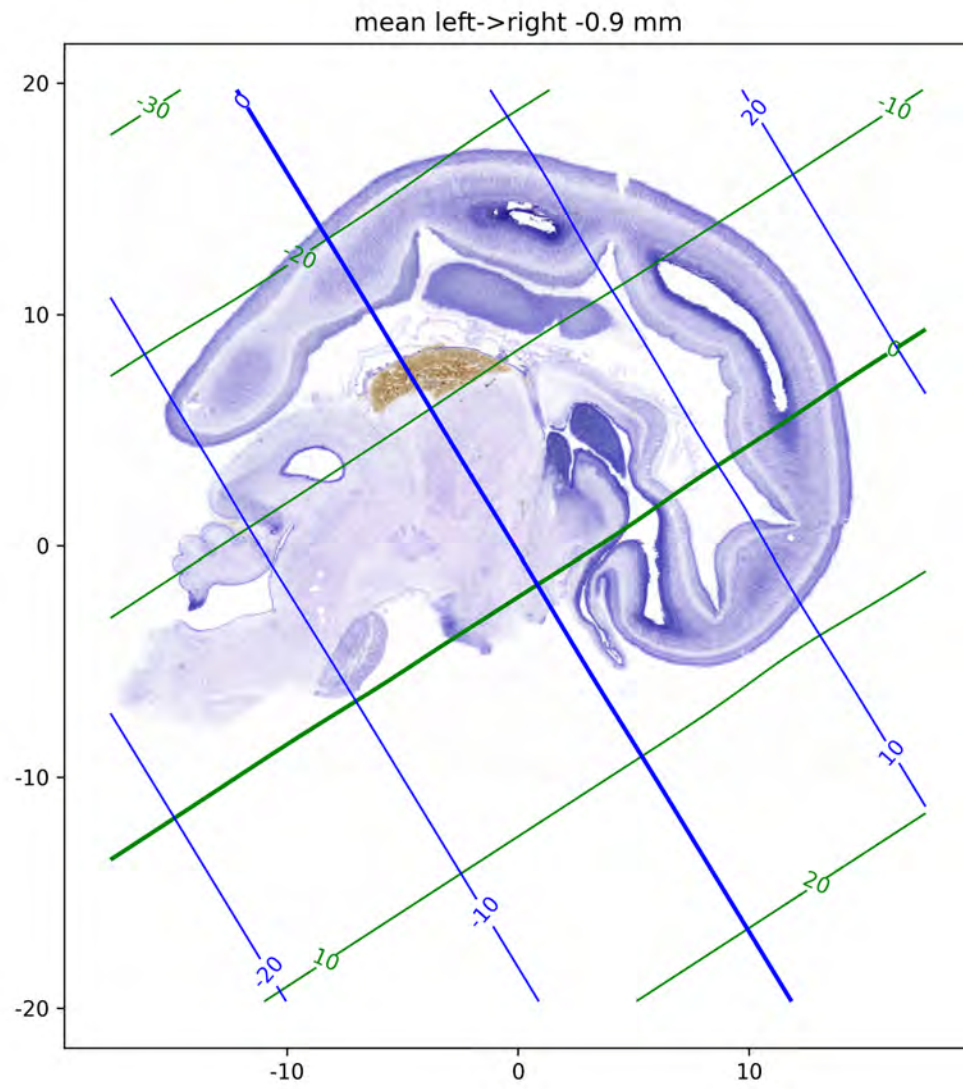





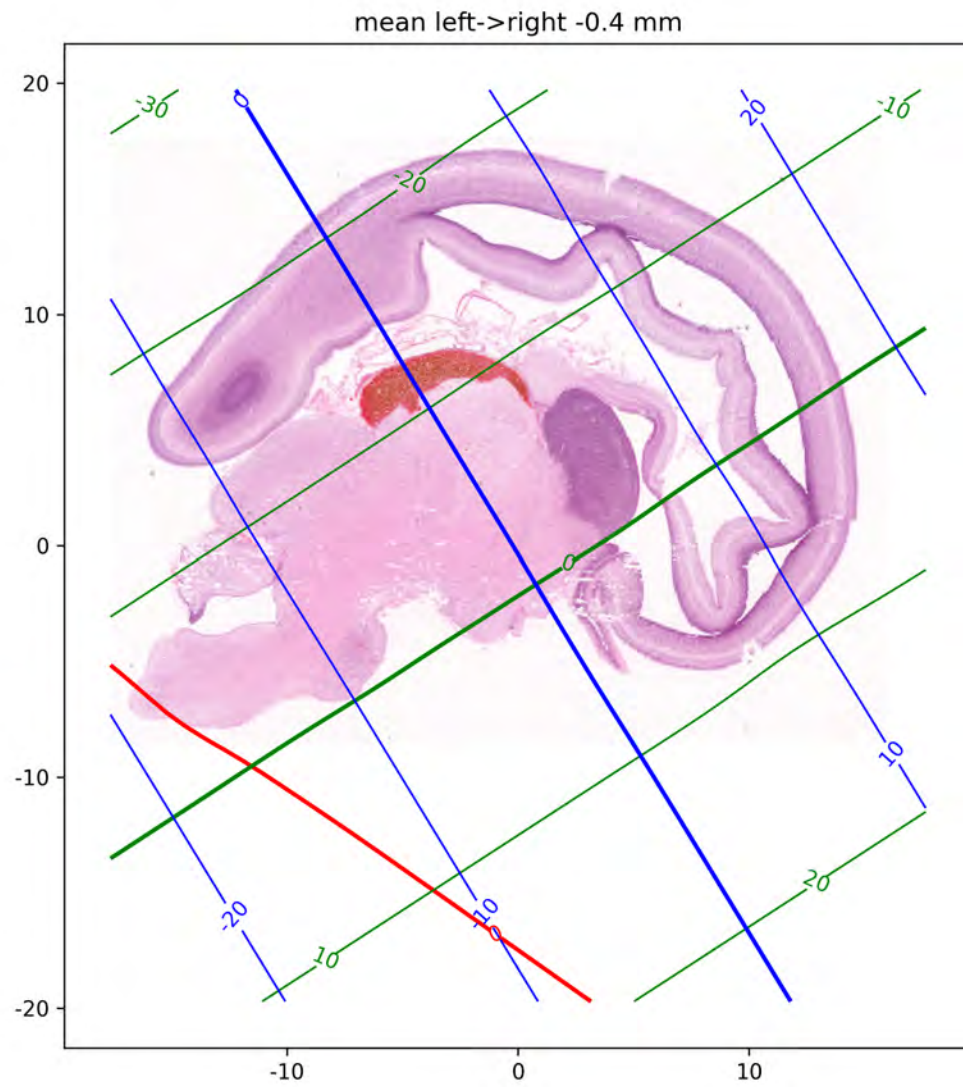



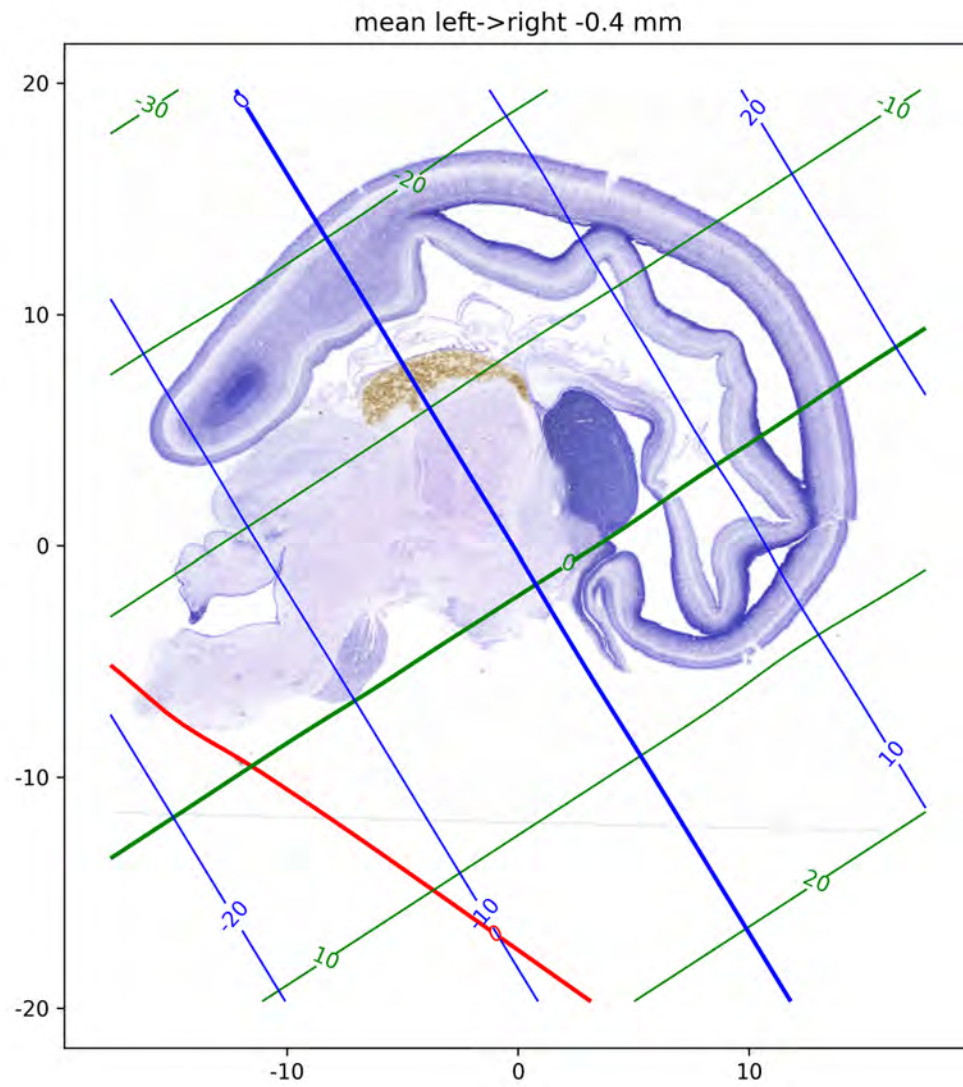



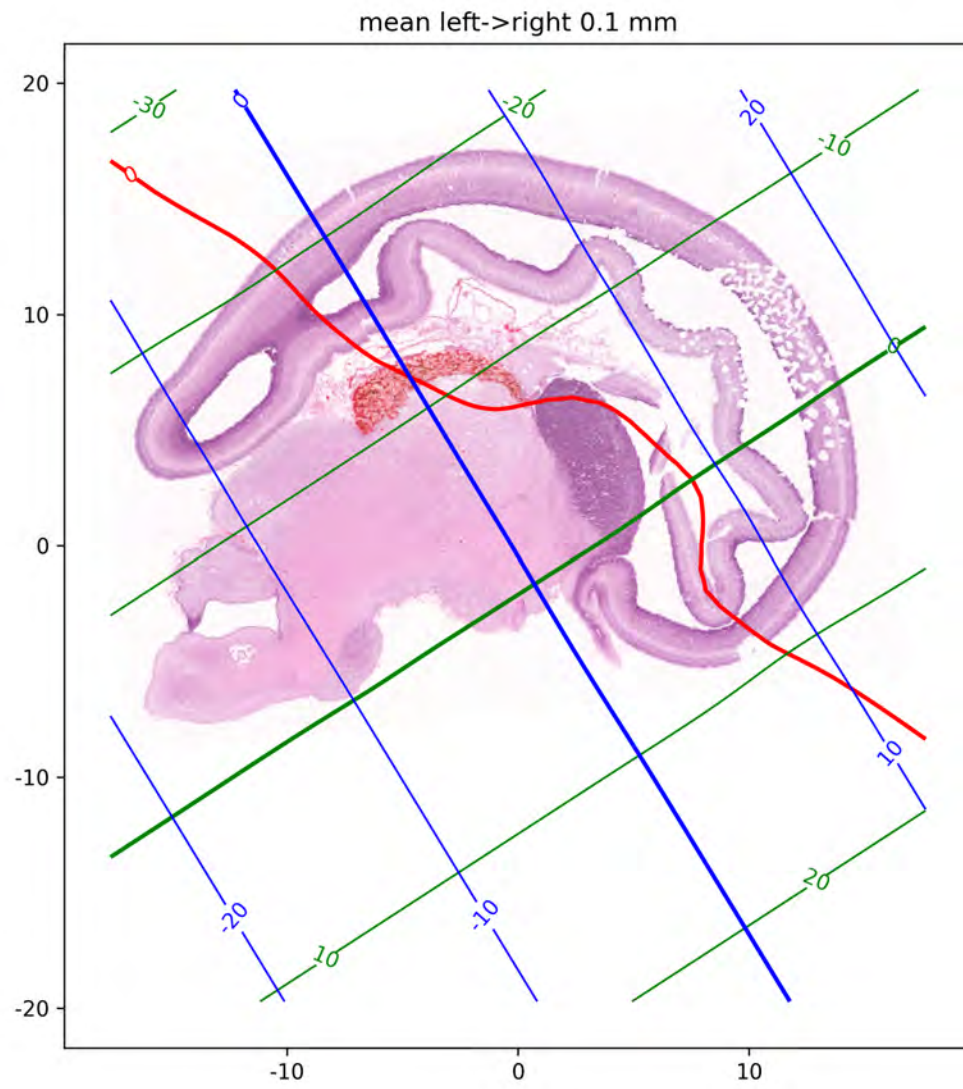









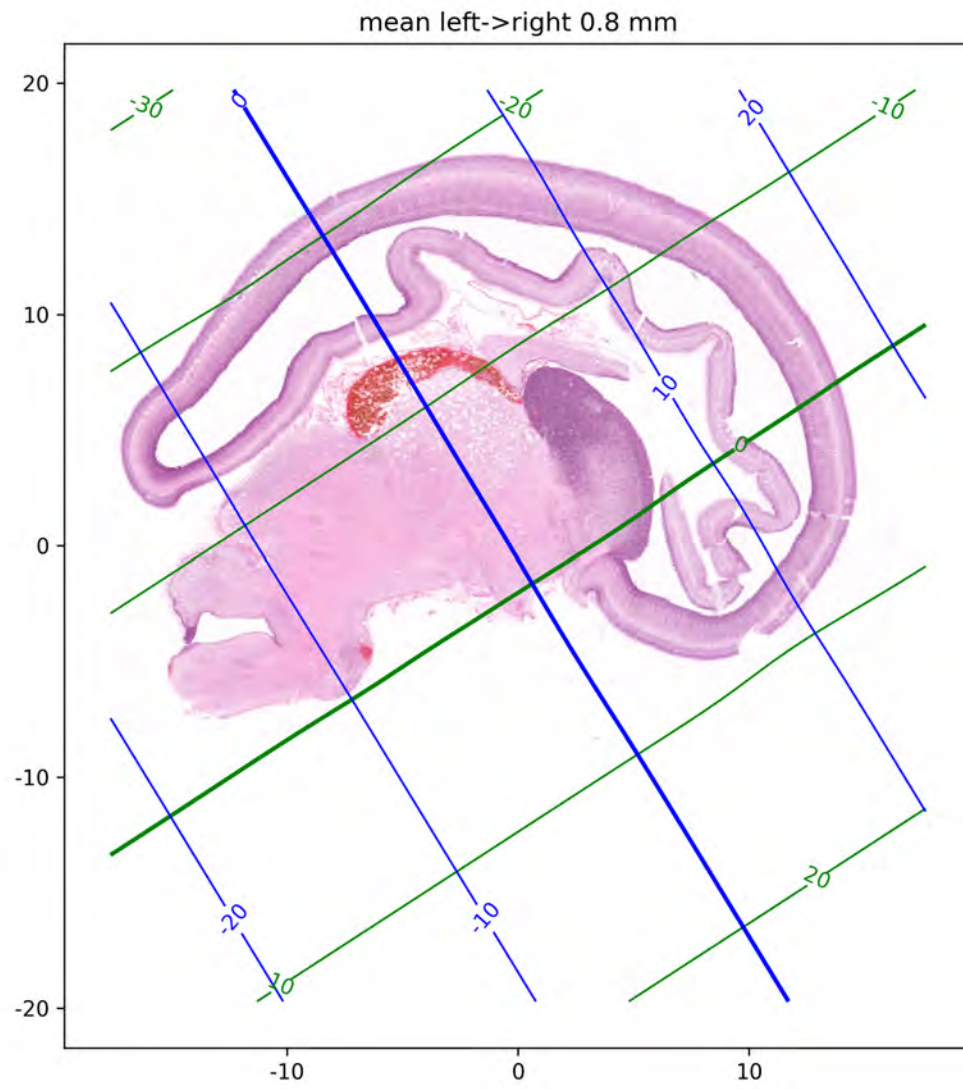

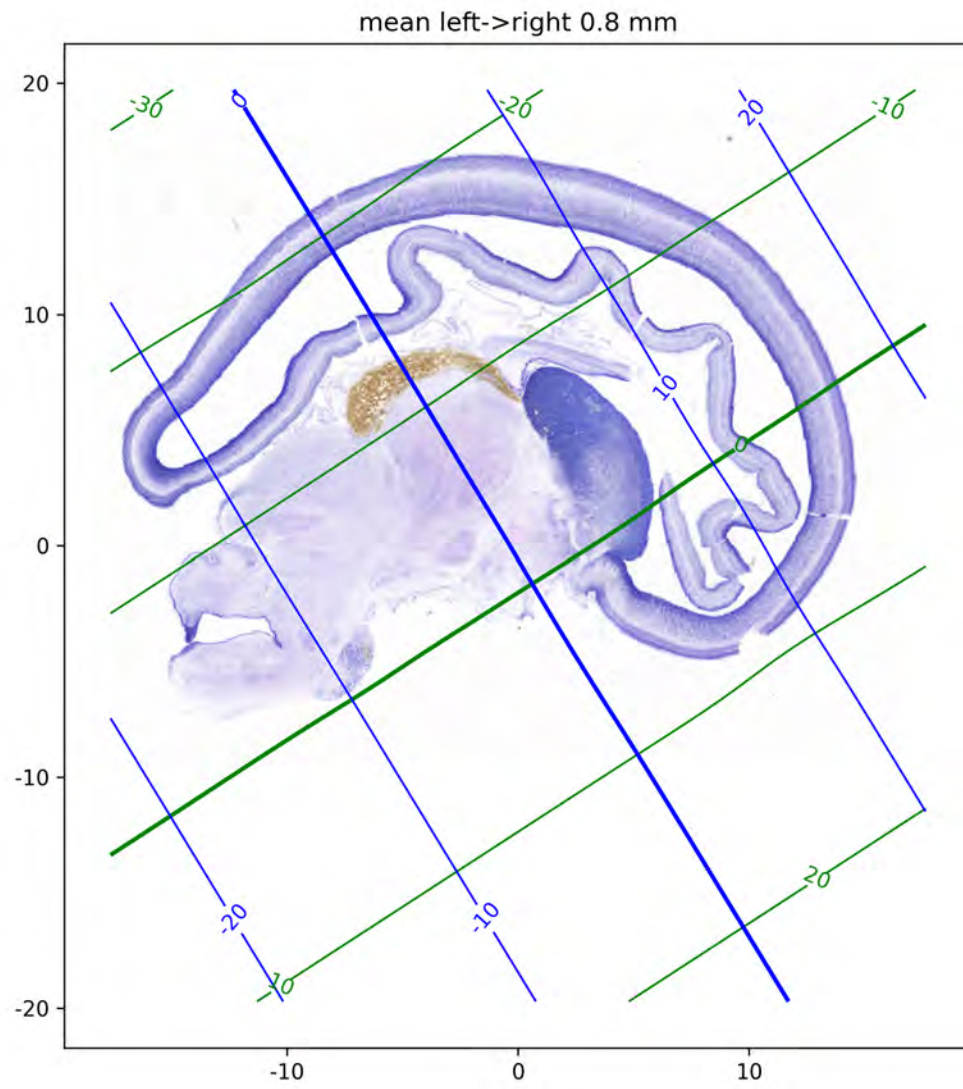



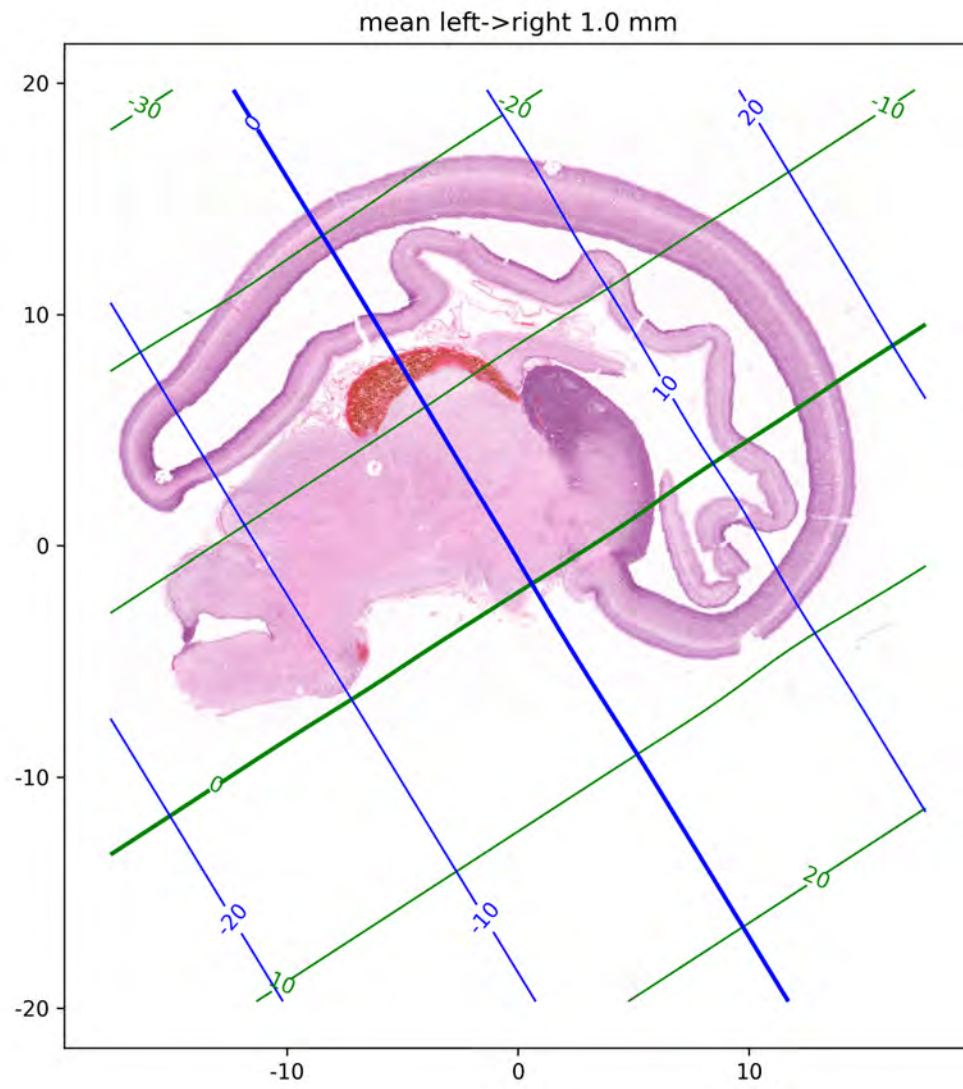

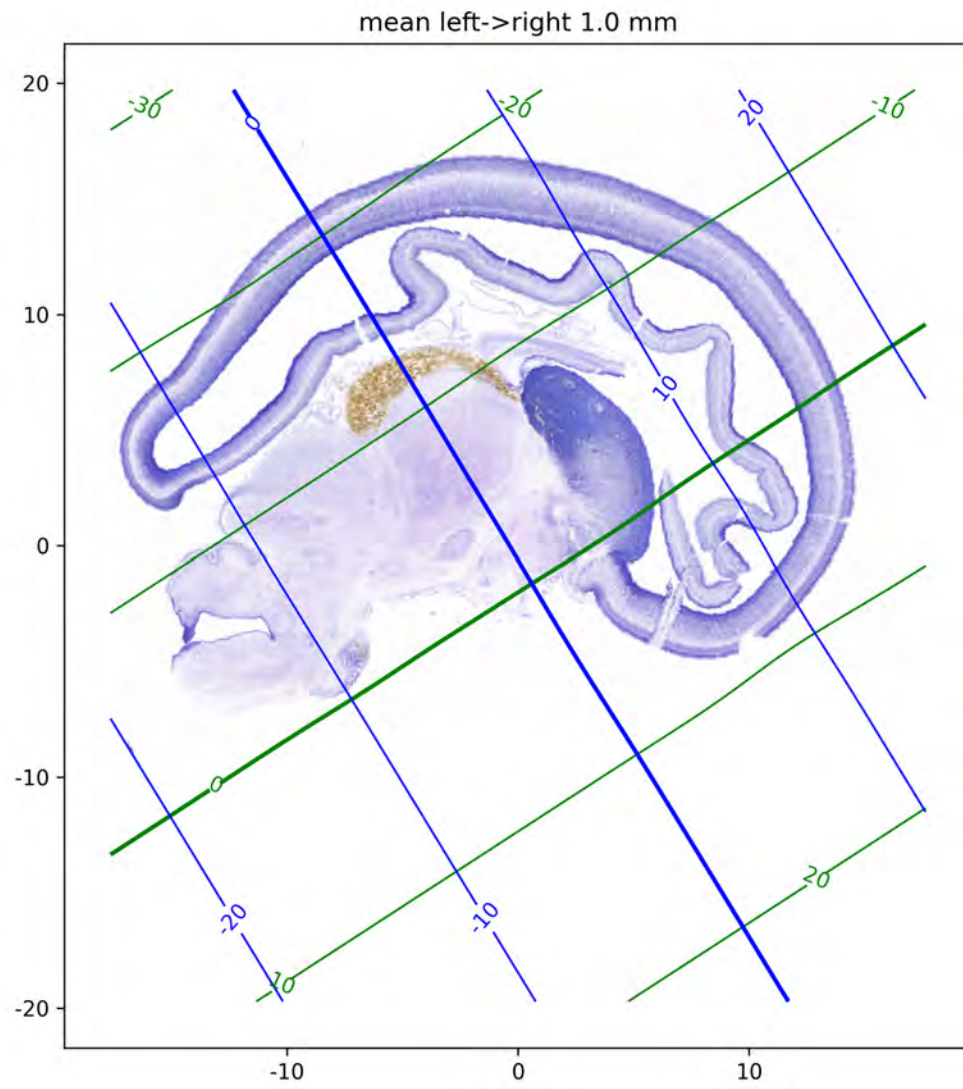





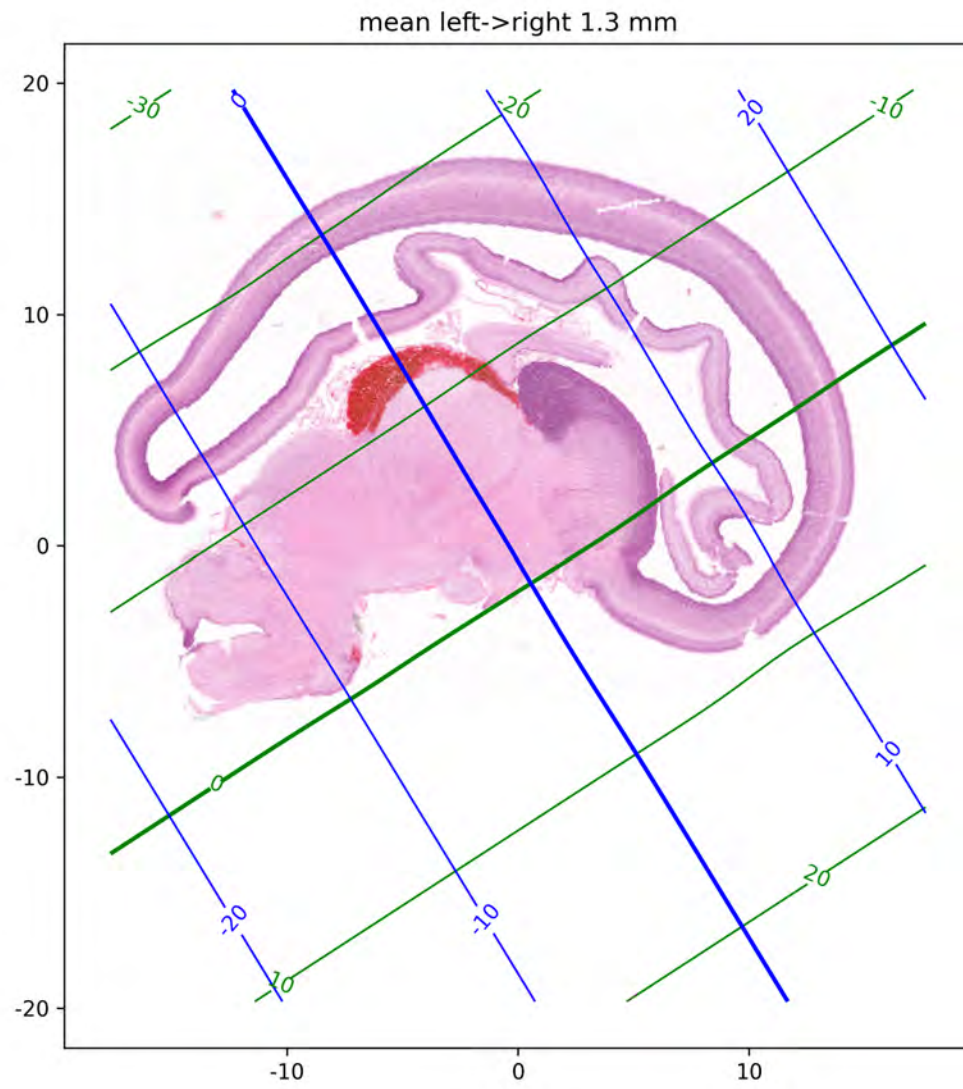

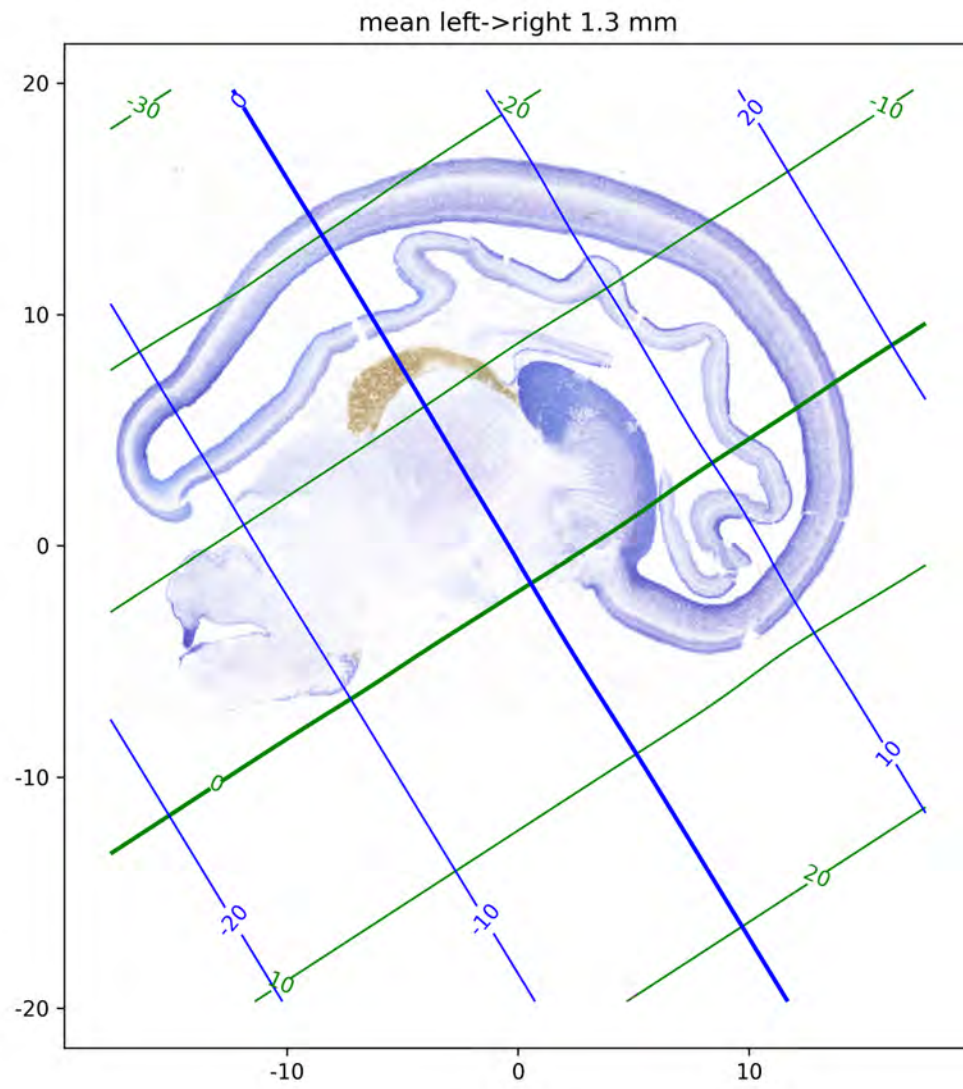

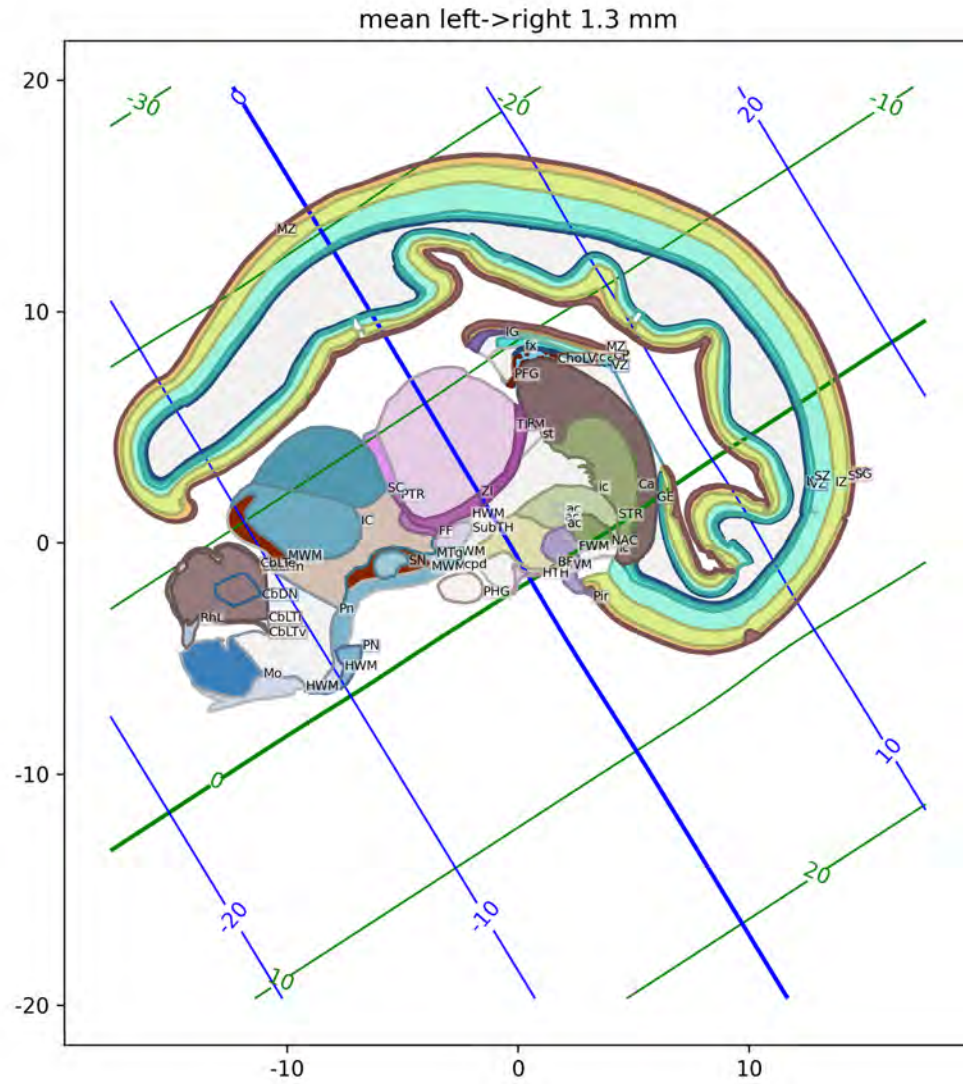

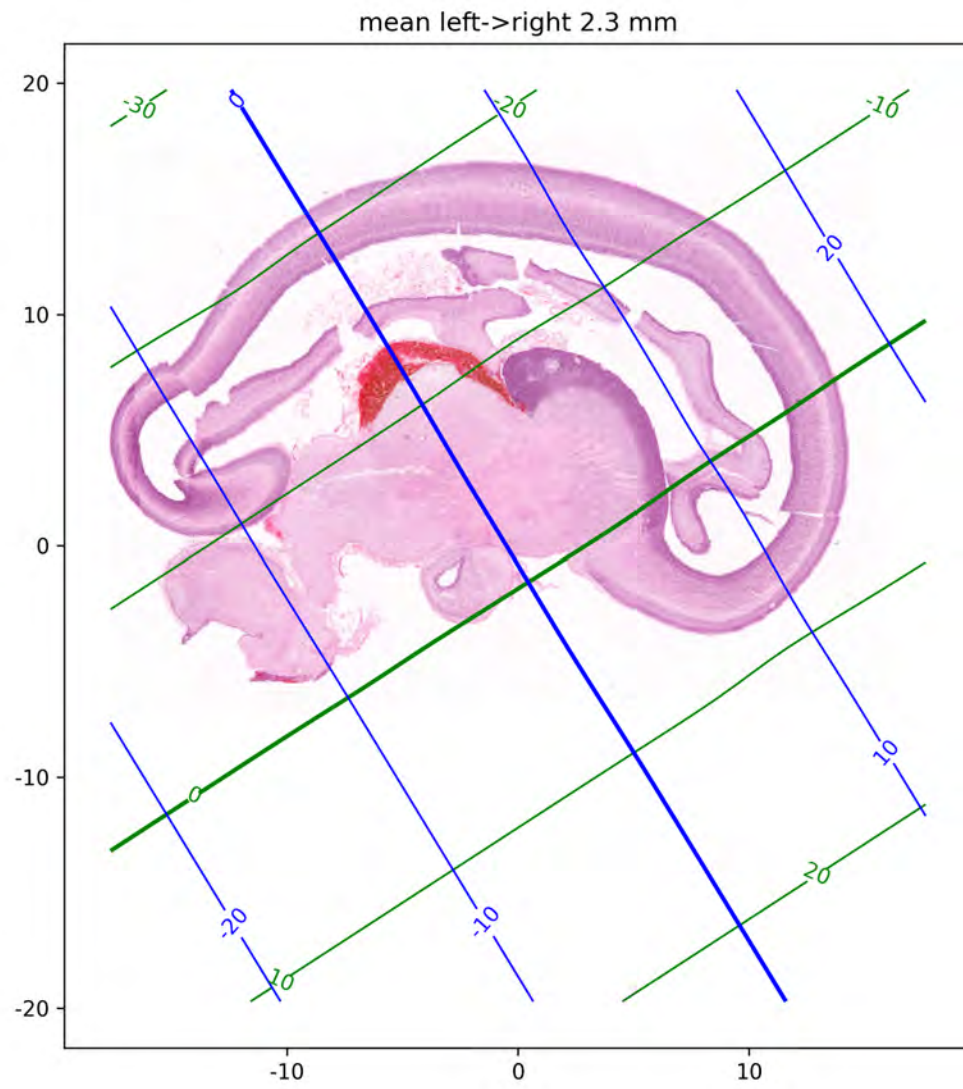



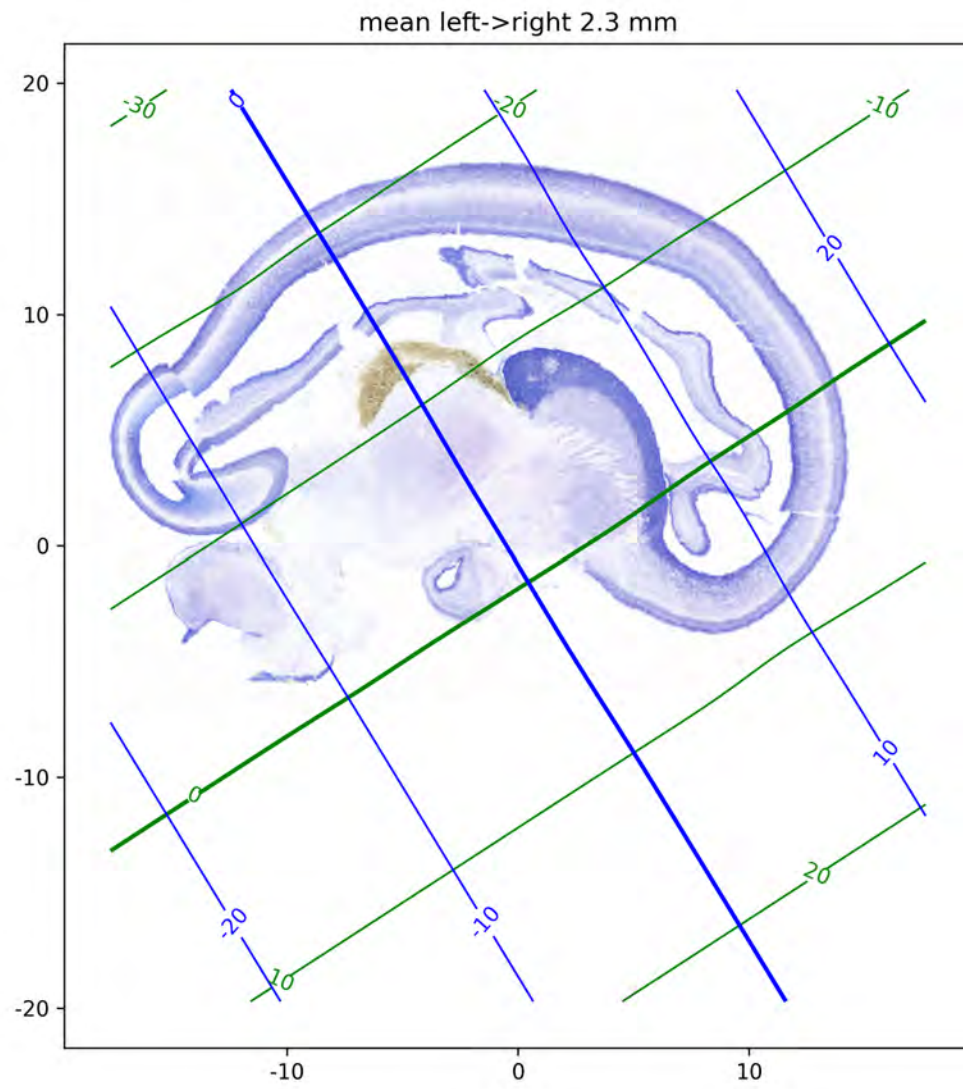



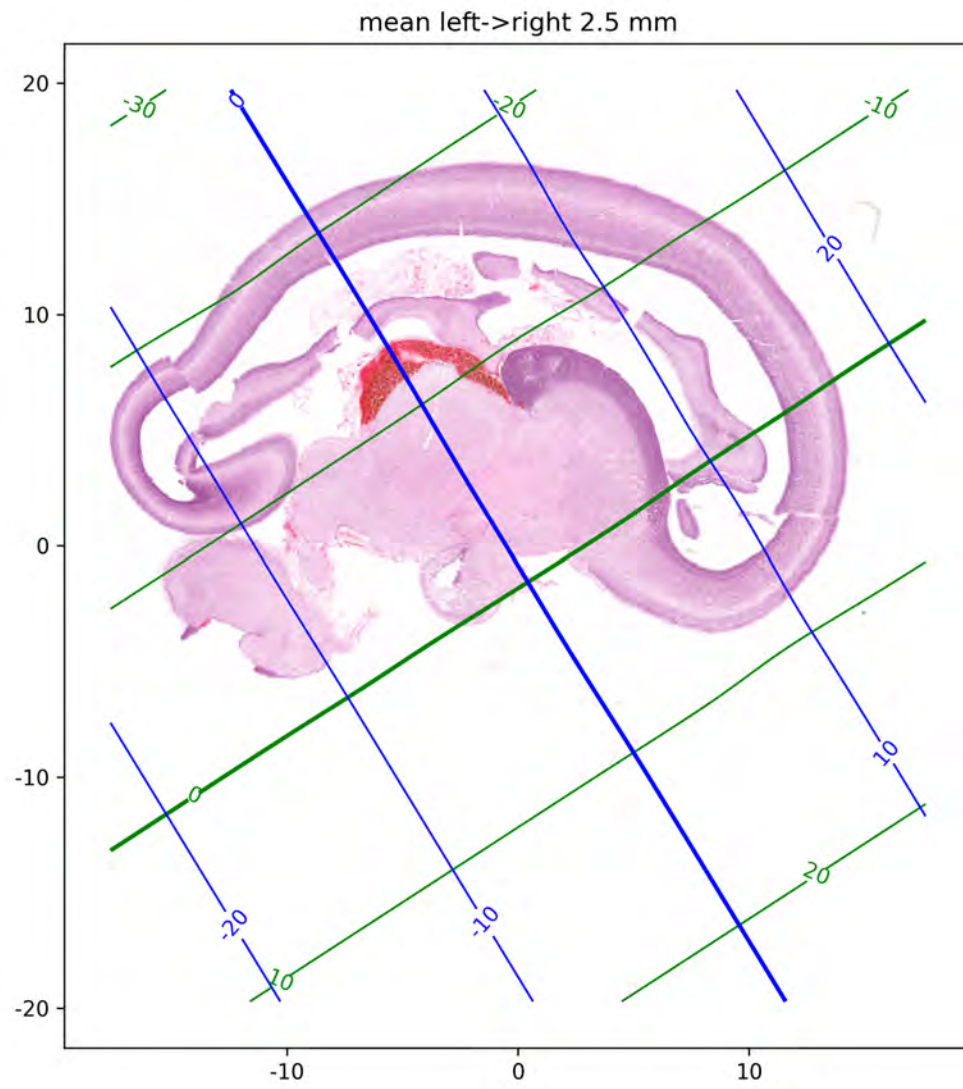

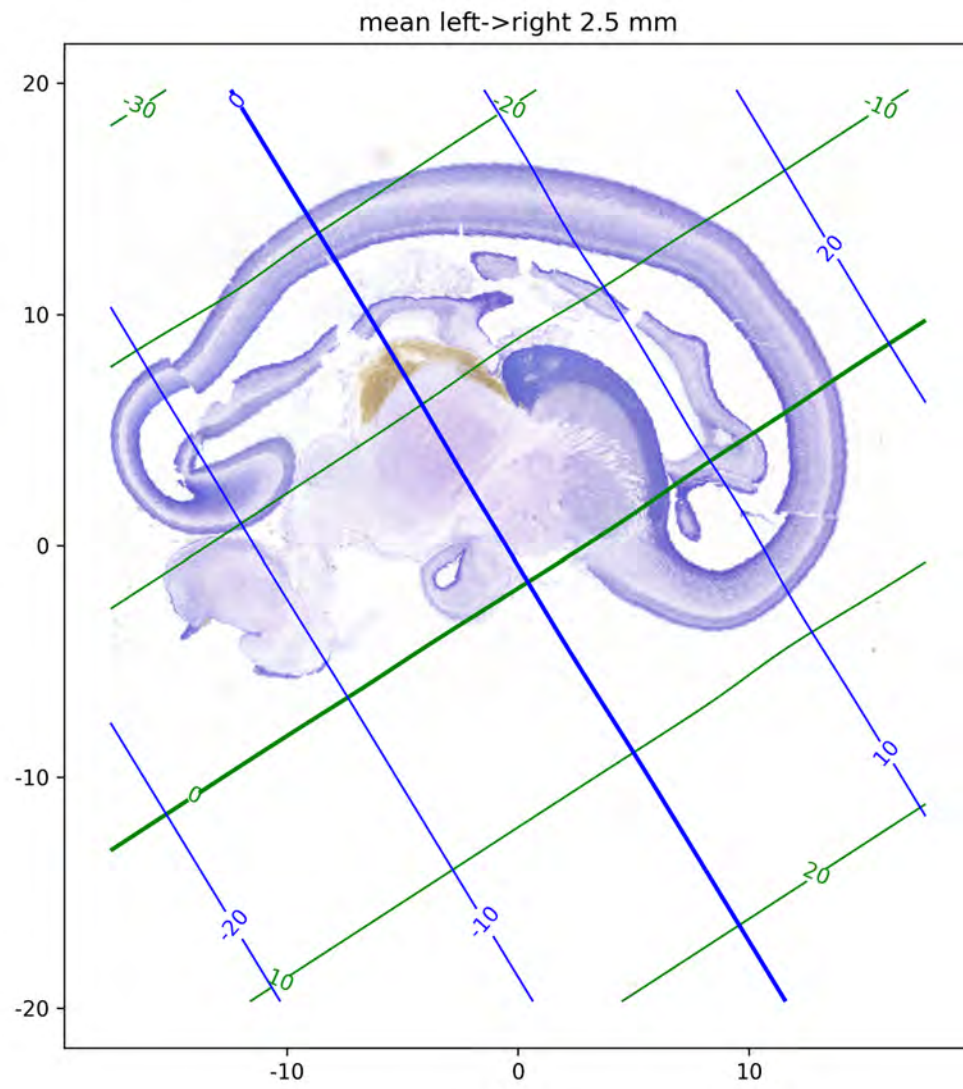





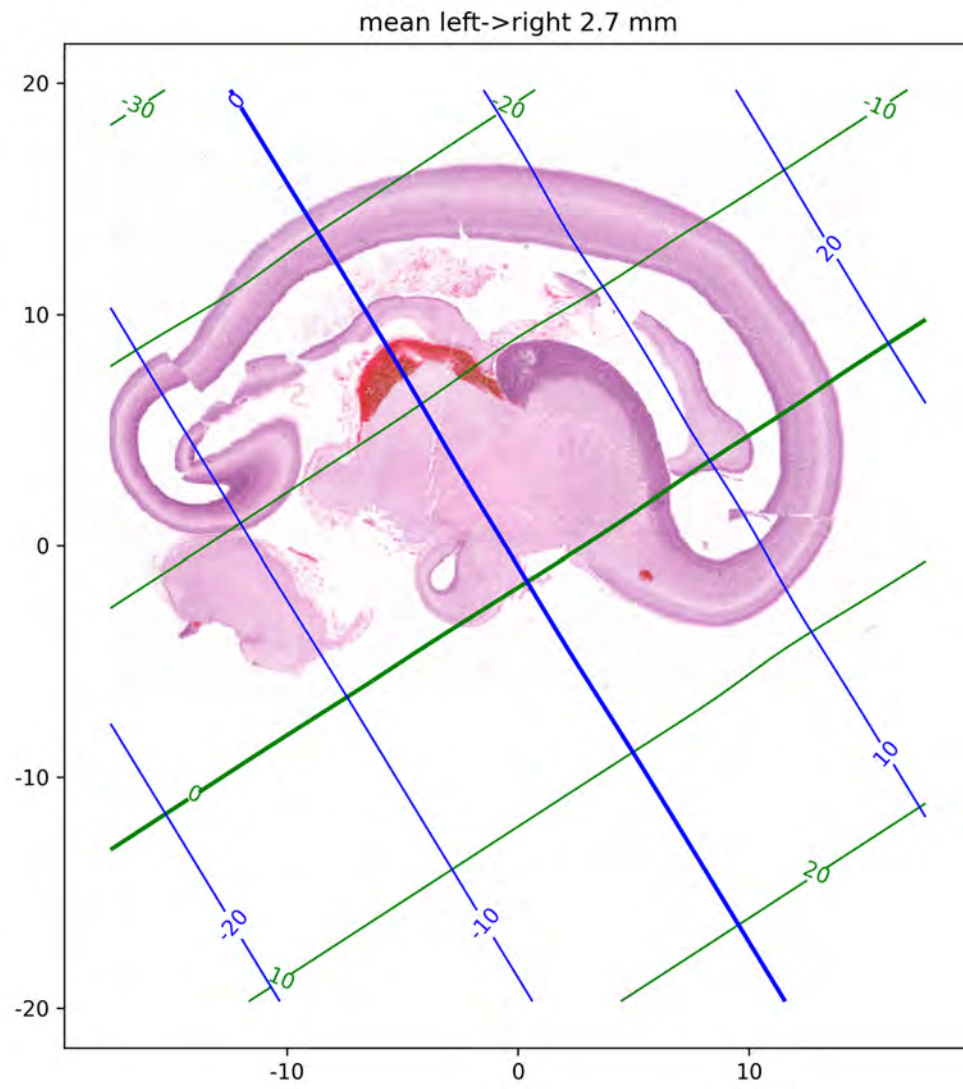

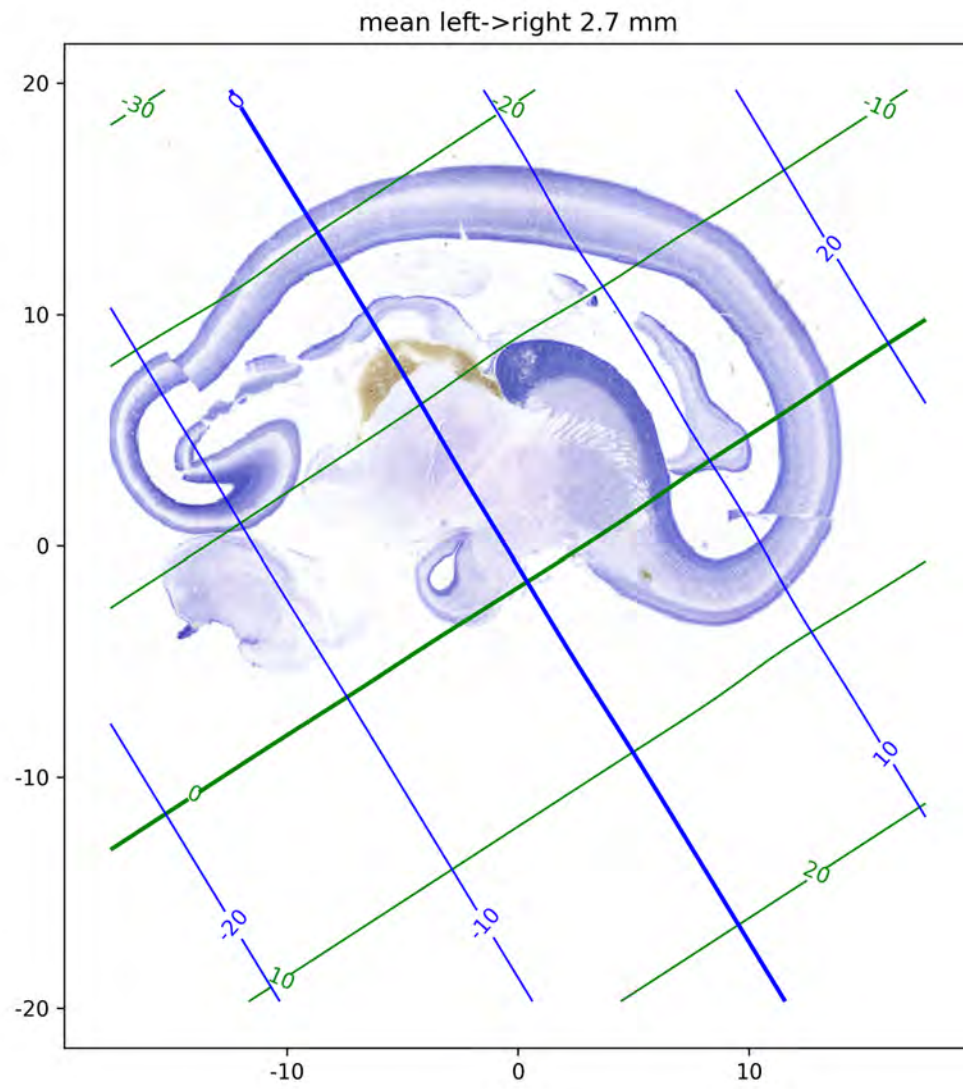



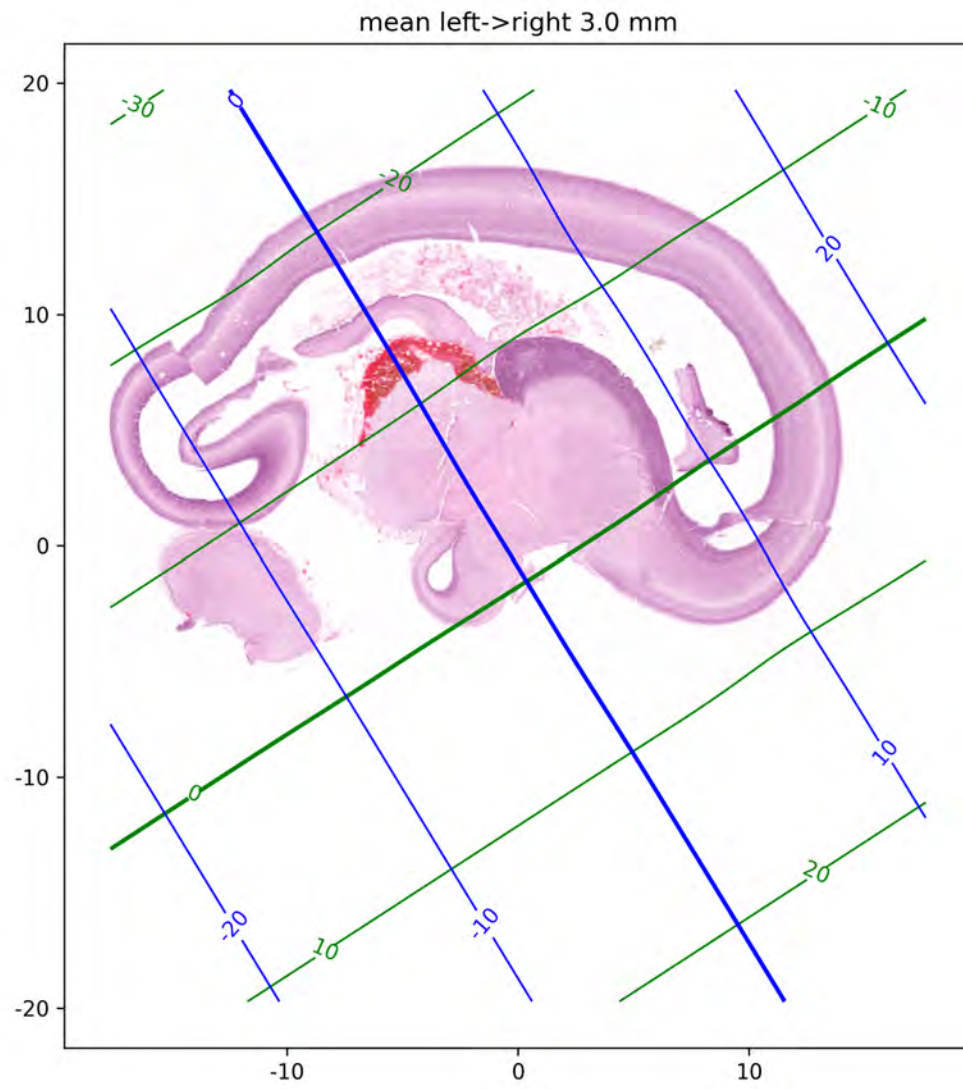

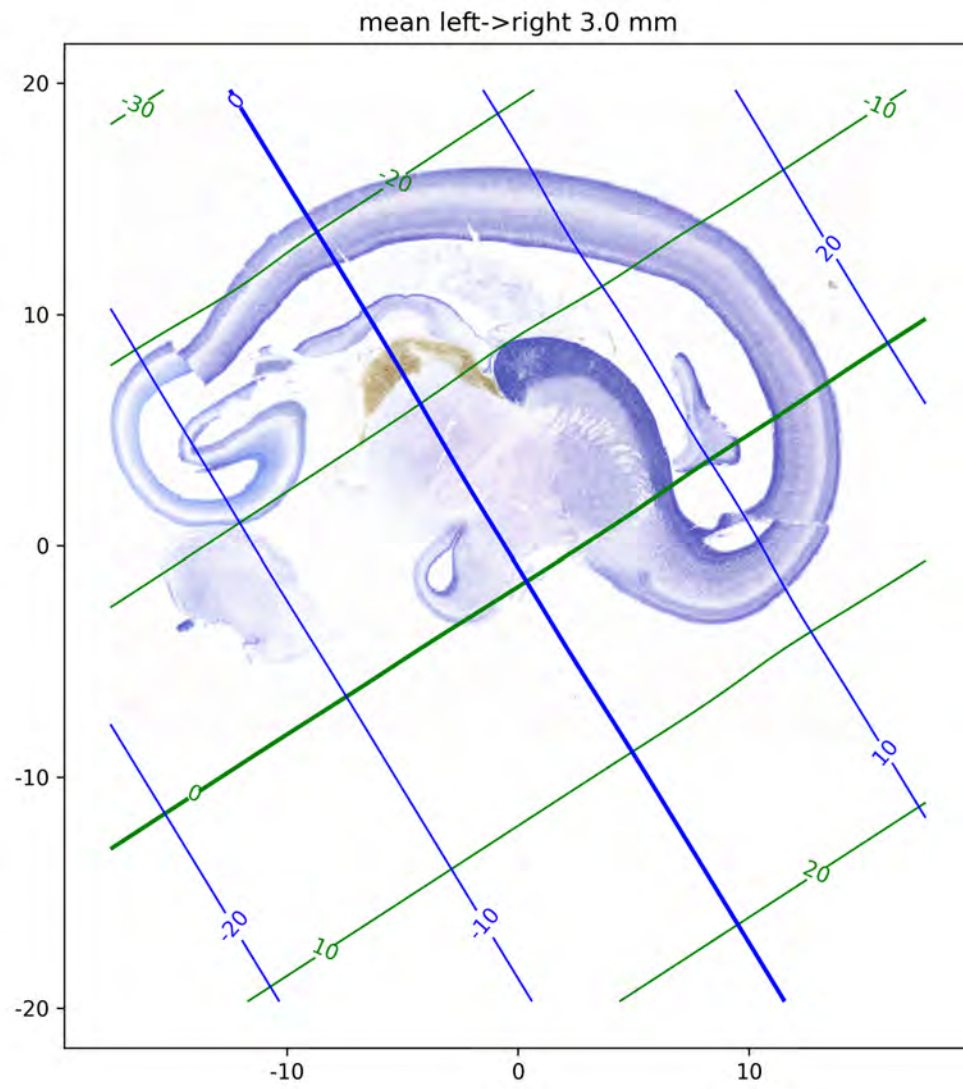





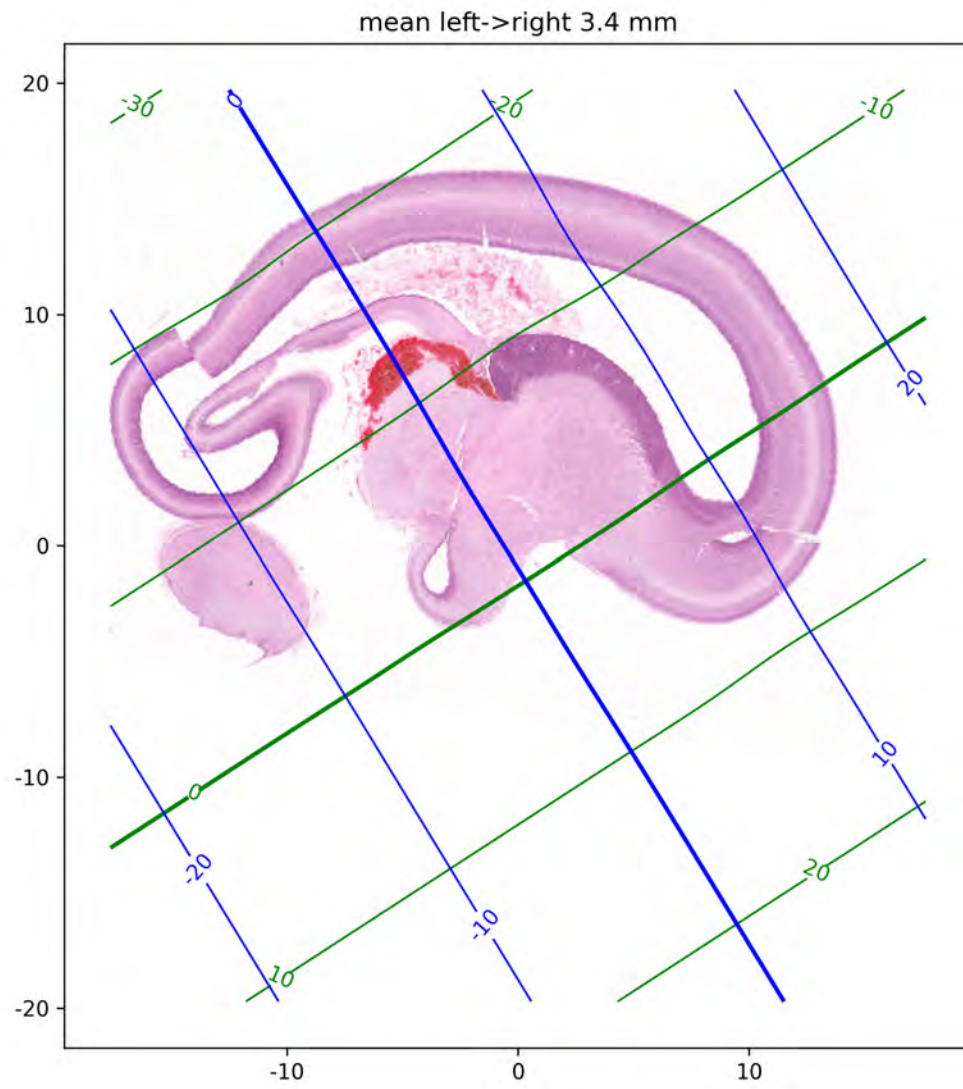

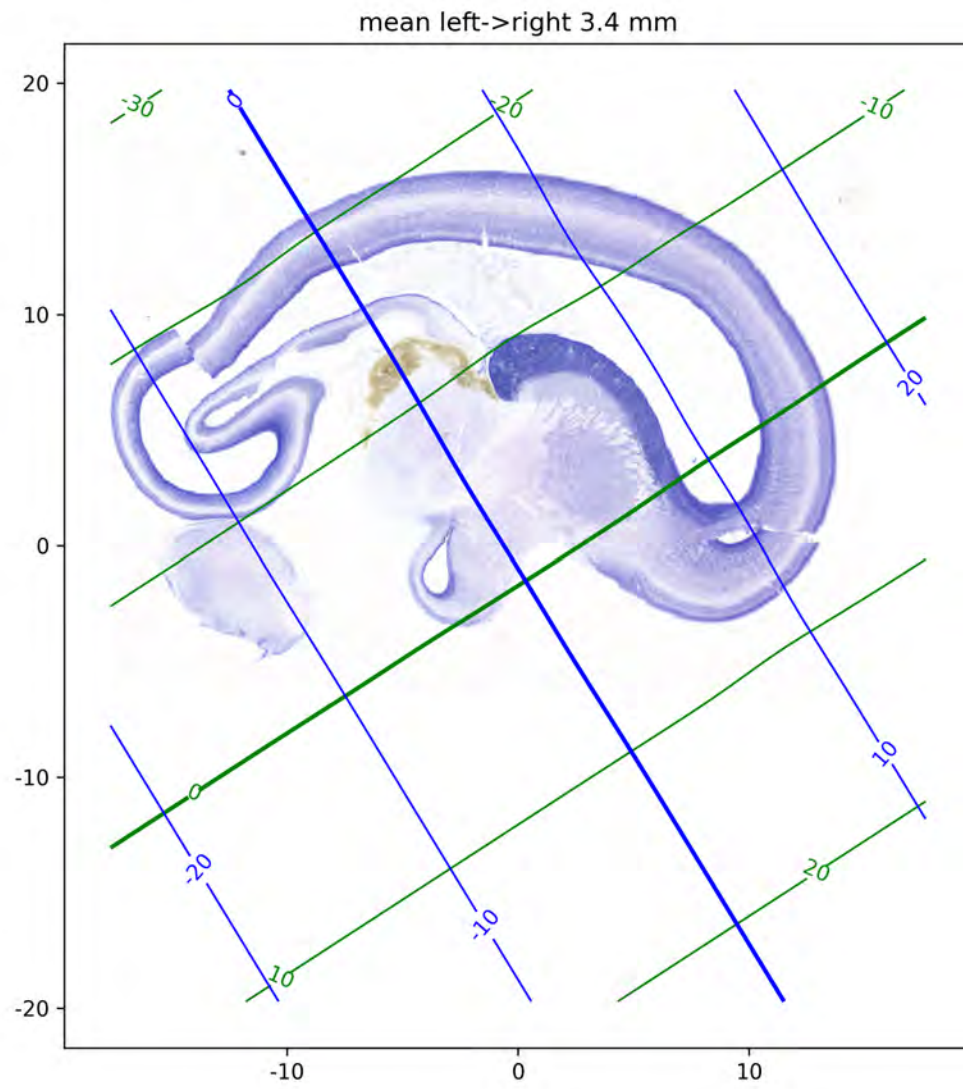



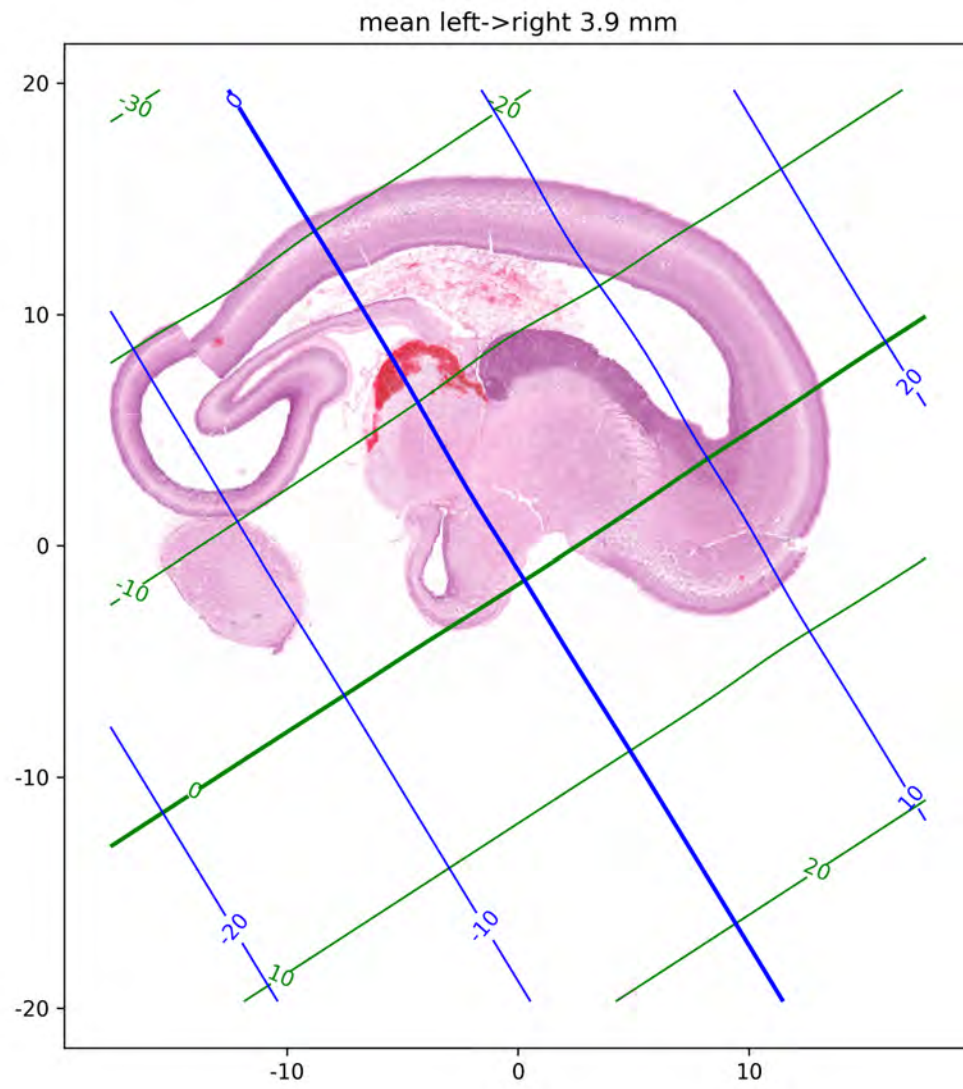



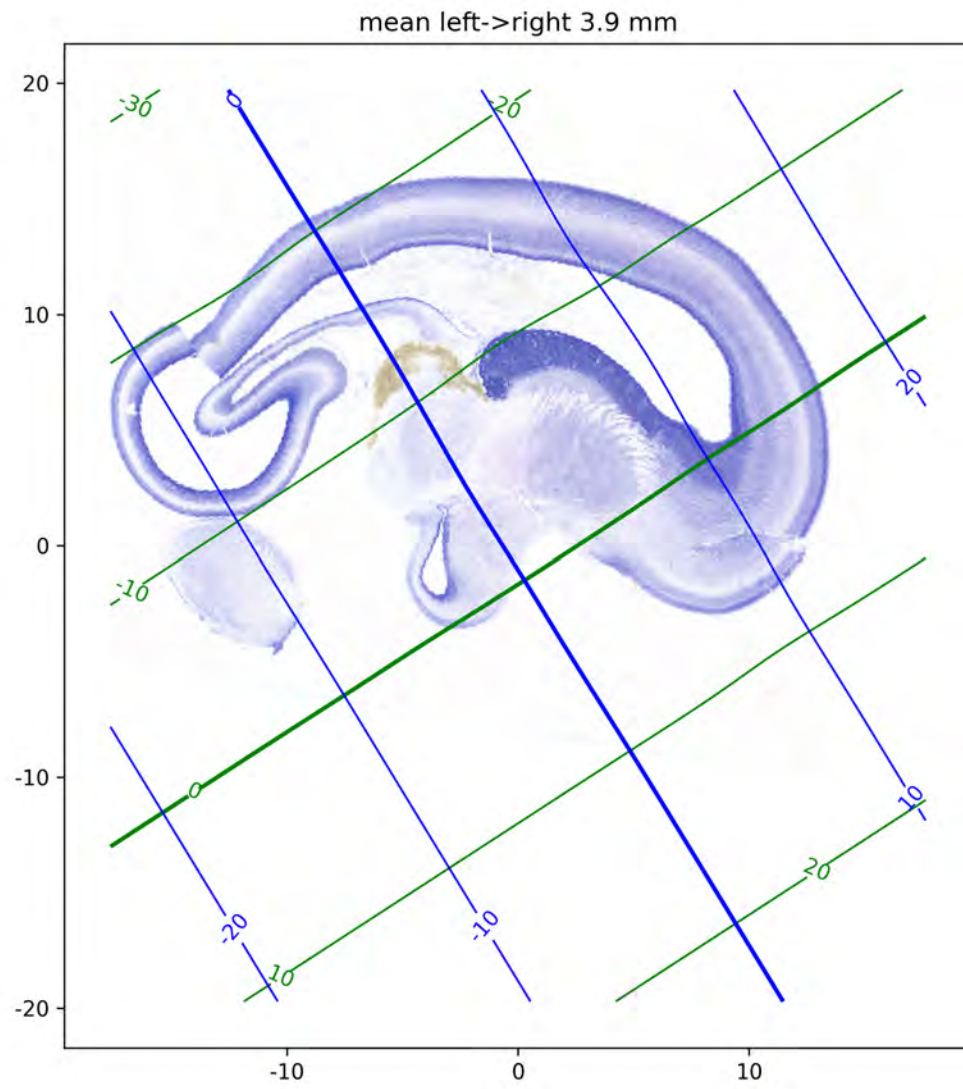

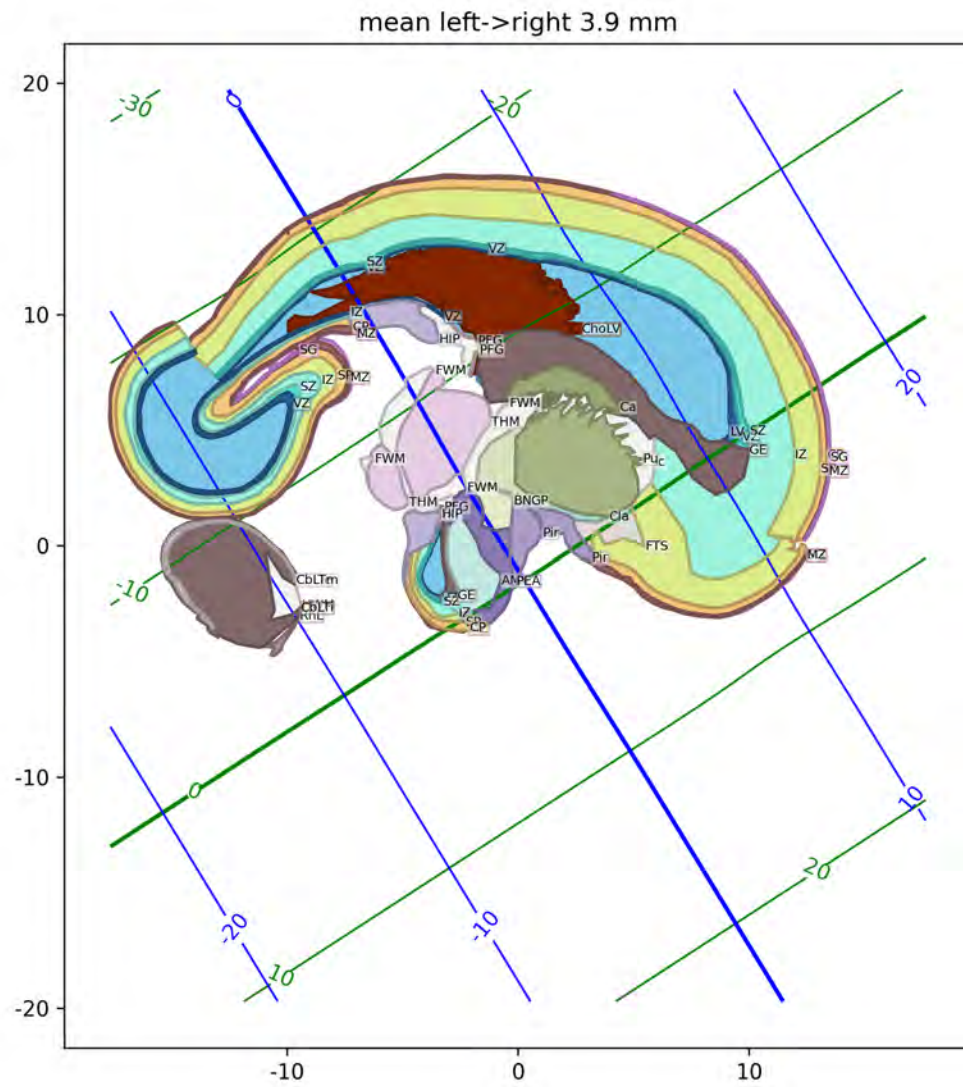

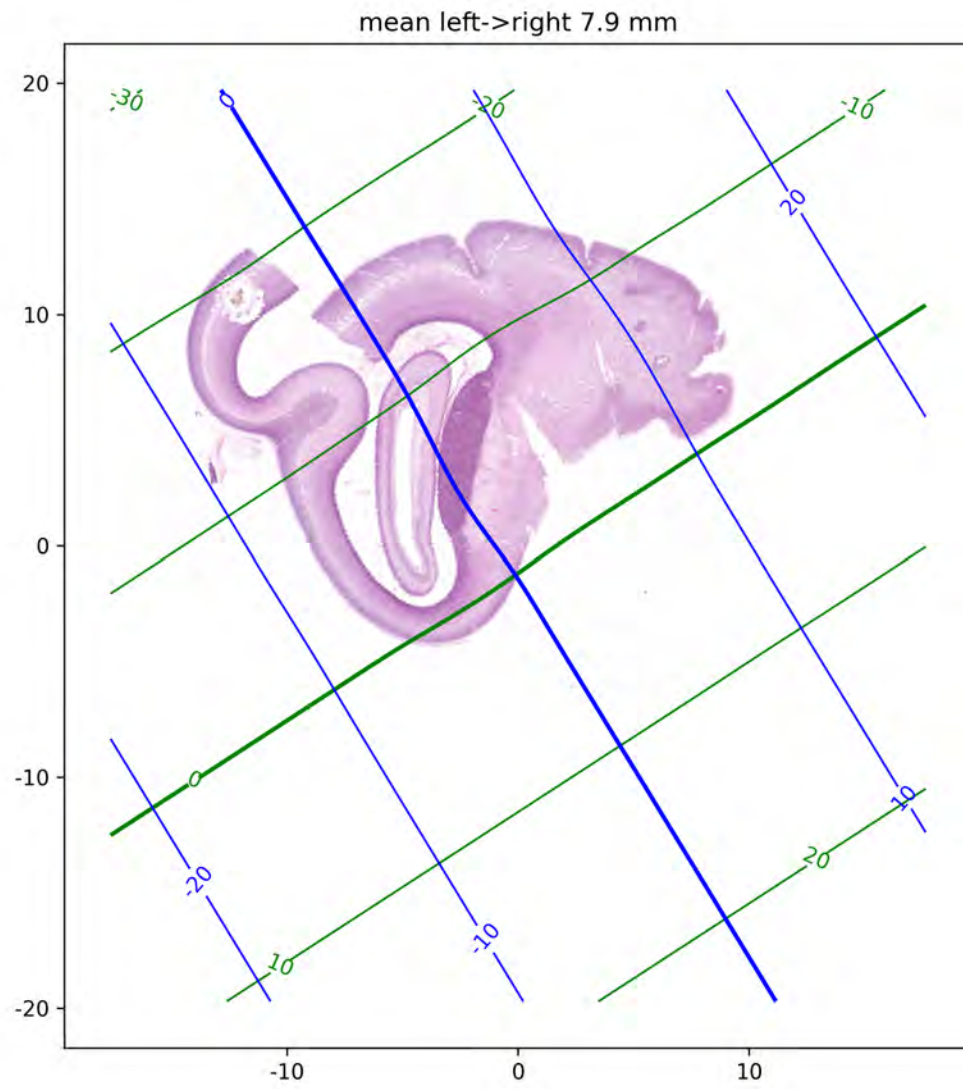

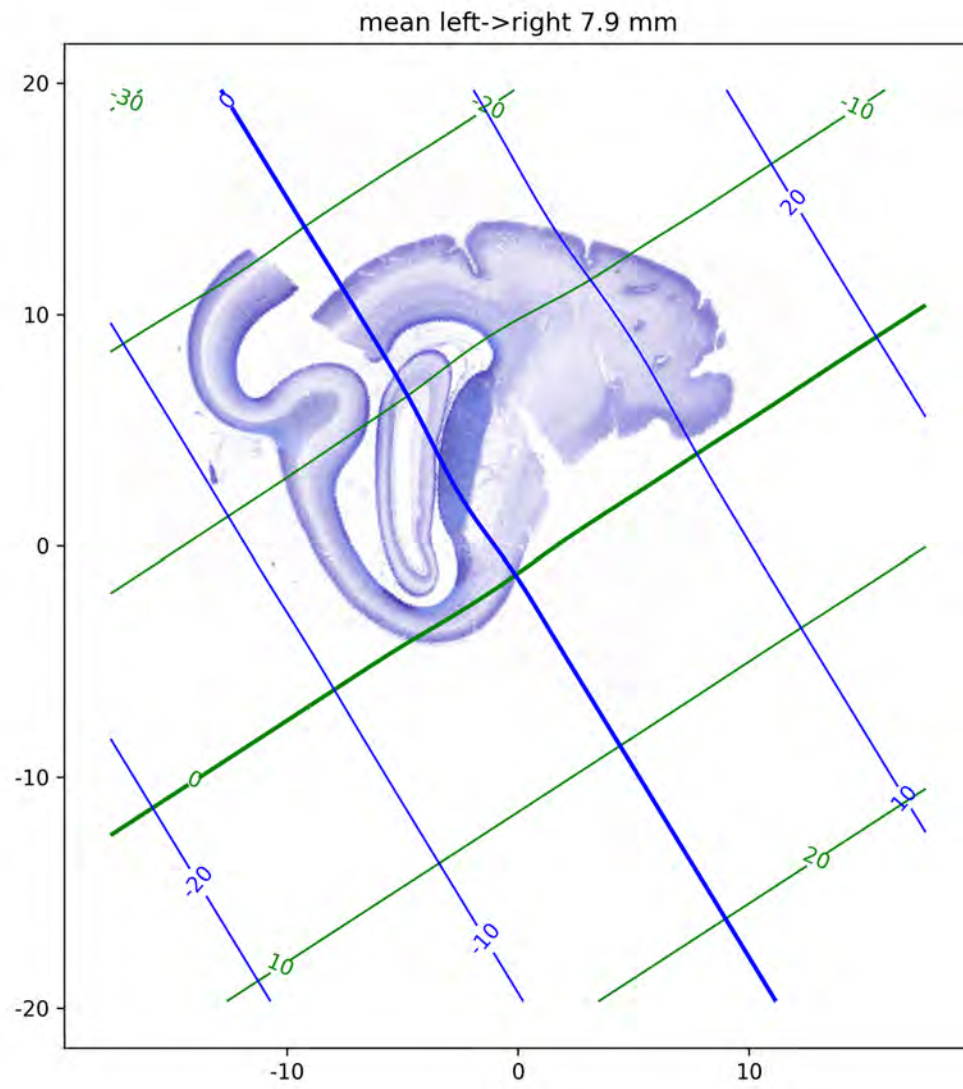

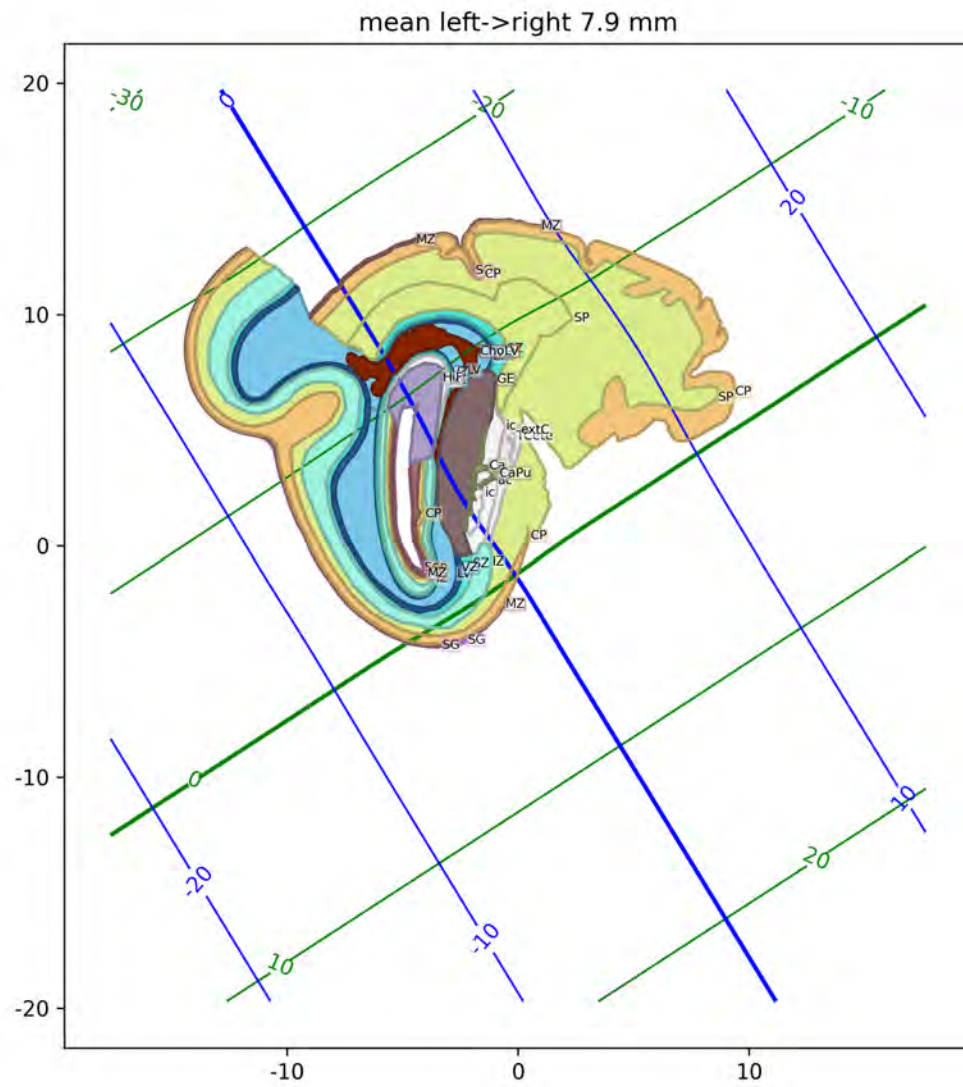



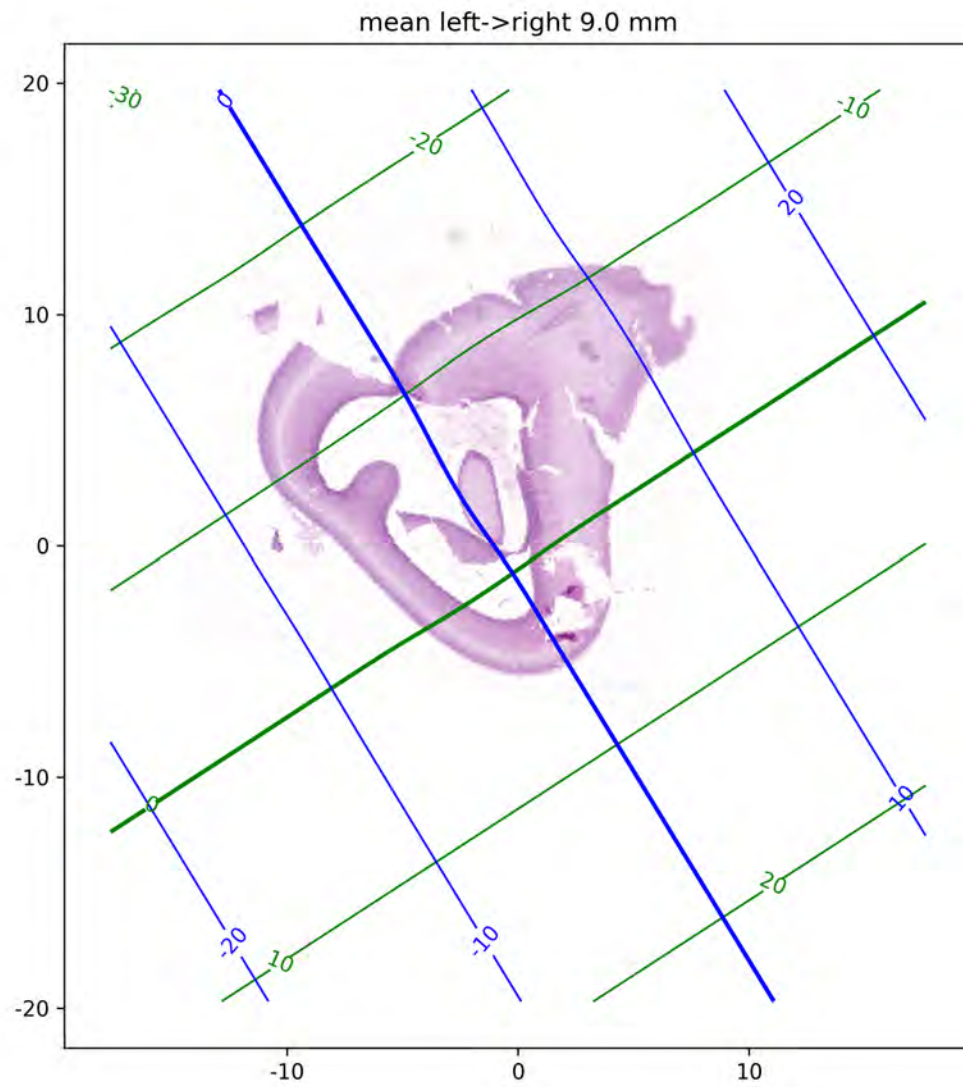

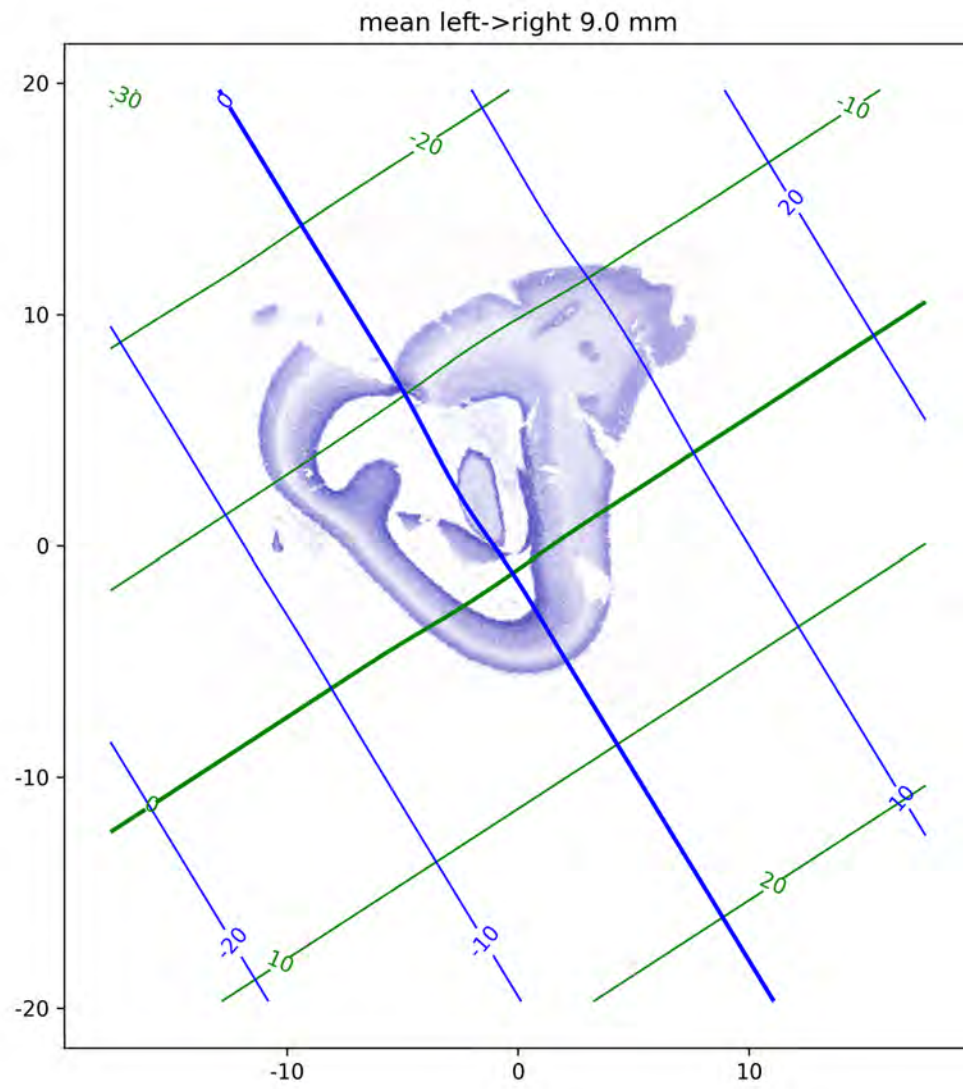

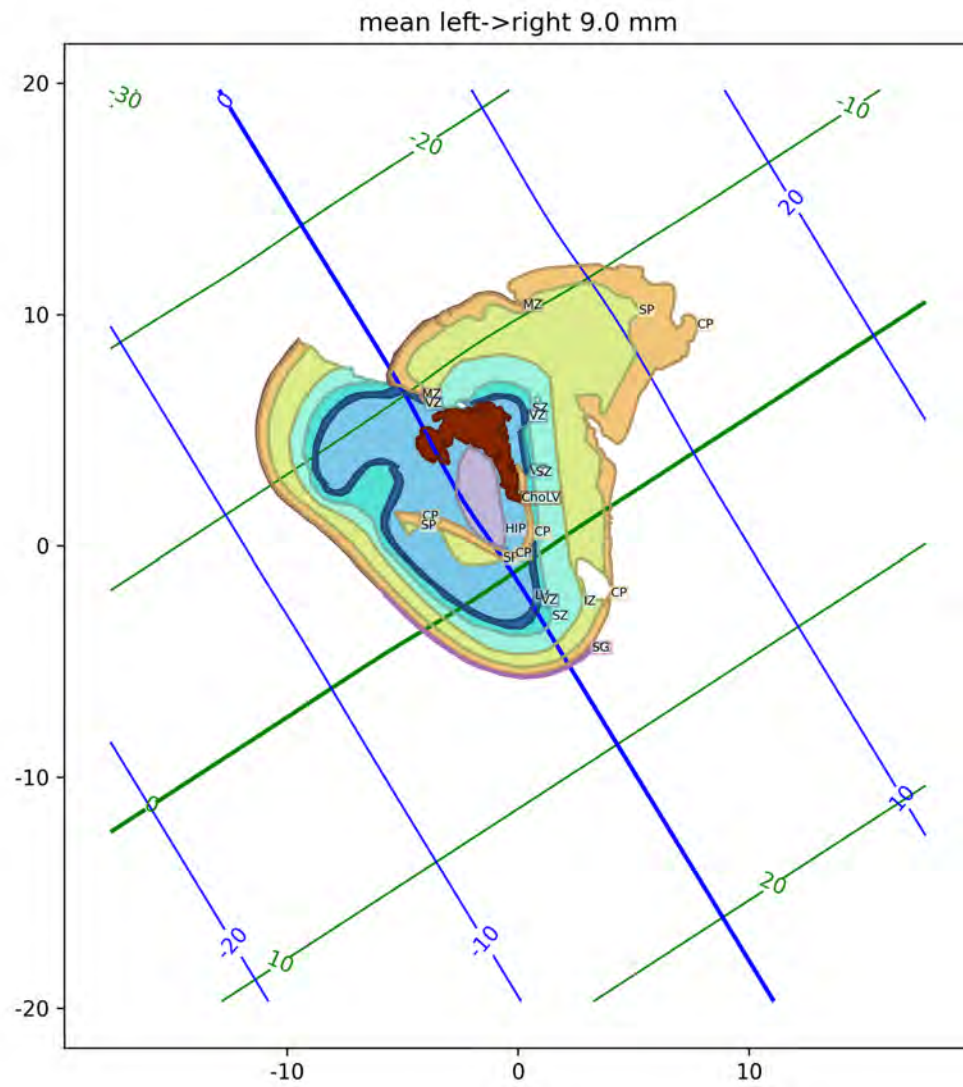

Supplement: Supplementary file [file a7751e07efe6313de30f4b99.pdf]
