# Supplementary material for: A three-dimensional histological cell atlas of the developing human brain
Source: Research Square preprint supplement (doi:10.21203/rs.3.rs-5658034/v1), 2025-01-10
Supplement: Supplementary file 1 [file ae5a10e5730fea9001956c60.pdf]

**Table S1: Demographics of donors and input datasets derived from donors**

| <b>Specimen ID</b> | <b>A-P (cms)</b> | <b>Bi temporal diameter (cms)</b> | <b>Brain weight (gms)</b> | <b>Age (GW)</b> |
|--------------------|------------------|-----------------------------------|---------------------------|-----------------|
| S1 /FB3            | 6.2              | 4.6                               | 50                        | 21              |
| S2/ FB10           | 6.6              | 5.1                               | 56.24                     | 21-22           |
| S3/ FB36           | 2.8              | 3                                 | 7                         | 13-14           |
| S4/ FB63           | 2.8              | 2.3                               | 6                         | 13              |
| S5/ FB40           | 4.4              | 2.8                               | 8.62                      | 14-15           |

## S2: Summary of available atlases and volumes of fetal brain development

*Table A Histology based atlases of human brain development*

| Features                                | Bayer and Altman (2005) <sup>1</sup> | Allen Brain Institute human developmental atlas <sup>2</sup>           |
|-----------------------------------------|--------------------------------------|------------------------------------------------------------------------|
| Details of dataset                      | 2D print atlas (300dpi)              | 2D digital (1 um/pixel) available online                               |
| Number of brains/age                    | 9 whole brains/ 13.5to 24GW          | 2 Hemispheres - 17GW(15PCW), 23GW(21PCW) and one brainstem 23GW(21PCW) |
| Annotated sections                      | 88 annotations across 9 brains       | 168 annotations across the 3 samples                                   |
| Maximum number of annotations per brain | 20                                   | 81                                                                     |
| Section thickness                       | 35um                                 | 20um                                                                   |
| Spacing between sections                | Variable and uneven                  | 250-1200um                                                             |
| Embedding                               | Celloidin                            | OCT                                                                    |
| Staining                                | Nissl and Myelin for older brains    | Nissl/ ISH/ AchE/ Myelin for older brains                              |

*Table B MRI based data volumes and atlases of human brain development*

| Atlas/Vol                          | Information     |          |            | Atlas Generation method                  |                    |                          | N        | Method details                                                  |
|------------------------------------|-----------------|----------|------------|------------------------------------------|--------------------|--------------------------|----------|-----------------------------------------------------------------|
|                                    | Modality        | Age (GW) | Resolution | Registration                             | Atlas construction | Kernel regression        |          |                                                                 |
| Habas et al., 2010 <sup>3</sup>    | T2w             | 21-24    | 0.5mm      | Elastic deformation based on tissue maps | Group-wise         | No                       | 20       | 1.5 T 1x1x3 mm <sup>3</sup>                                     |
| Serag et al., 2011 <sup>4</sup>    | T2w             | 23-37    | 1.18mm     | Affine + Bspline free form deformation   | Pairwise           | Adaptive Gaussian kernel | 80       | 1.5T 1.25x1.25x2.5 mm <sup>3</sup>                              |
| Zhan et al., 2013 <sup>5</sup>     | Post-mortem T2w | 15-22    | —          | SyN in ANTs                              | Group-wise         | No                       | 34       | 7T 0.19x0.19x0.5mm <sup>3</sup> or 0.23x0.23x0.5mm <sup>3</sup> |
| Dittrich et al., 2014 <sup>6</sup> | Ventricle only  | 20 - 30  | 0.78-0.9mm | Semi-supervised learning                 | —                  | Gaussian kernel          | 32 + 12* | 1.5T 0.78-0.9                                                   |

|                                        |                              |                               |       |                                                            |                              |                                       |     |                                                |
|----------------------------------------|------------------------------|-------------------------------|-------|------------------------------------------------------------|------------------------------|---------------------------------------|-----|------------------------------------------------|
|                                        |                              |                               |       |                                                            |                              |                                       |     | mm<br>(x,y)<br>3-<br>4.4mm<br>slices           |
| Wright et al., 2015 <sup>7</sup>       | Cortical<br>Surface<br>Atlas | 23-<br>37                     | —     | Surface<br>registration<br>based on<br>sulcal<br>alignment |                              | Gaussian<br>kernel                    | 80  | 1.5T                                           |
| Gholipour et al.,<br>2017 <sup>8</sup> | T2w                          | 21-<br>37                     | 0.8mm | Greedy<br>SyN in<br>ANTs                                   | Group-<br>wise               | Fixed-<br>width<br>Gaussian<br>kernel | 81  | 3T or<br>1.5T<br>0.9~1.<br>1-<br>2mm<br>slices |
| Xia et al., 2019 <sup>9</sup>          | Cortical<br>Surface<br>Atlas | 26.5,<br>27,<br>28.2,<br>28.7 |       | Surface<br>registration                                    | —                            | No                                    | 25  | 1.5T<br>0.5×0.<br>5×2.5<br>mm <sup>3</sup>     |
| Li et al., 2021 <sup>10</sup>          | T2w                          | 23-<br>36                     | 0.8mm | Affine +<br>SyN in<br>ANTs                                 | Pairwise<br>+ group-<br>wise | No                                    | 212 | 1.5T<br>0.74×0.<br>.74×4<br>mm <sup>3</sup>    |
| Wu et al., 2021 <sup>11</sup>          | T2w                          | 22-<br>35                     | 0.8mm | SyN in<br>ANTs                                             | Group-<br>wise               | Adaptive<br>Gaussian<br>kernel        | 735 | 1.5T<br>4mm<br>slice                           |
| Uus et al., 2021 <sup>12</sup>         | T2w                          | 21-<br>36                     | 0.7mm | MIRTK<br>atlas<br>generation<br>pipeline                   | —                            | Gaussian<br>kernel                    | 291 | 3T<br>1.1×1.<br>1×2.2<br>mm <sup>3</sup>       |
| Xu et al 2022 <sup>13</sup>            | T2w                          | 23-<br>38                     | 0.8mm | ANTs<br>Rigid+affin<br>e+SyN                               | Pairwise<br>+group-<br>wise  | Adaptive<br>Gaussian<br>kernel        | 219 | 3T<br>1.1×1.<br>1×2<br>mm <sup>3</sup>         |

\*abnormal brains

Abbreviations: GW = gestational age; SyN = symmetric diffeomorphic deformable registration algorithm; ANTs = advanced normalization tools.

## References

1. Bayer, S. A. & Altman, J. *The Human Brain During the Second Trimester*. (CRC Press, 2005). doi:10.1201/9780203507483.
2. Ding, S.-L. *et al.* Cellular resolution anatomical and molecular atlases for prenatal human brains. *J Comp Neurol* **530**, 6–503 (2022).
3. Habas, P. A. *et al.* A spatiotemporal atlas of MR intensity, tissue probability and shape of the fetal brain with application to segmentation. *NeuroImage* **53**, 460–470 (2010).

4. Serag, A. *et al.* Construction of a consistent high-definition spatio-temporal atlas of the developing brain using adaptive kernel regression. *NeuroImage* **59**, 2255–2265 (2012). <http://brain-development.org/>
5. Zhan, J. *et al.* Spatial–temporal atlas of human fetal brain development during the early second trimester. *Neuroimage* **82**, 10.1016/j.neuroimage.2013.05.063 (2013). <http://www.loni.ucla.edu/Atlases/>
6. Dittrich, E. *et al.* A spatio-temporal latent atlas for semi-supervised learning of fetal brain segmentations and morphological age estimation. *Medical Image Analysis* **18**, 9–21 (2014).
7. Wright, R. *et al.* Construction of a fetal spatio-temporal cortical surface atlas from in utero MRI: Application of spectral surface matching. *NeuroImage* **120**, 467–480 (2015).
8. Gholipour, A. *et al.* A normative spatiotemporal MRI atlas of the fetal brain for automatic segmentation and analysis of early brain growth. *Scientific Reports* **7**, 476 (2017). [http://crl.med.harvard.edu/research/fetal\\_brain\\_atlas/](http://crl.med.harvard.edu/research/fetal_brain_atlas/)
9. Xia, J. *et al.* Fetal cortical surface atlas parcellation based on growth patterns. *Human Brain Mapping* **40**, 3881–3899 (2019).
10. Li, H. *et al.* Mapping fetal brain development based on automated segmentation and 4D brain atlasing. *Brain Struct Funct* **226**, 1961–1972 (2021).
11. Wu, J. *et al.* Age-specific structural fetal brain atlases construction and cortical development quantification for chinese population. *NeuroImage* **241**, 118412 (2021). <https://github.com/DeepBMI/FBA-Chinese>
12. Uus, A. *et al.* Multi-Channel 4D Parametrized Atlas of Macro- and Microstructural Neonatal Brain Development. *Front Neurosci* **15**, 661704 (2021). <https://gin.g-node.org/SVRTK>
13. Xu, X. *et al.* Spatiotemporal Atlas of the Fetal Brain Depicts Cortical Developmental Gradient. *J. Neurosci.* **42**, 9435–9449 (2022). <https://github.com/Thea-Eddie-Amy/CHN-fetal-brain-atlas>

### S3: Stereology correction factor

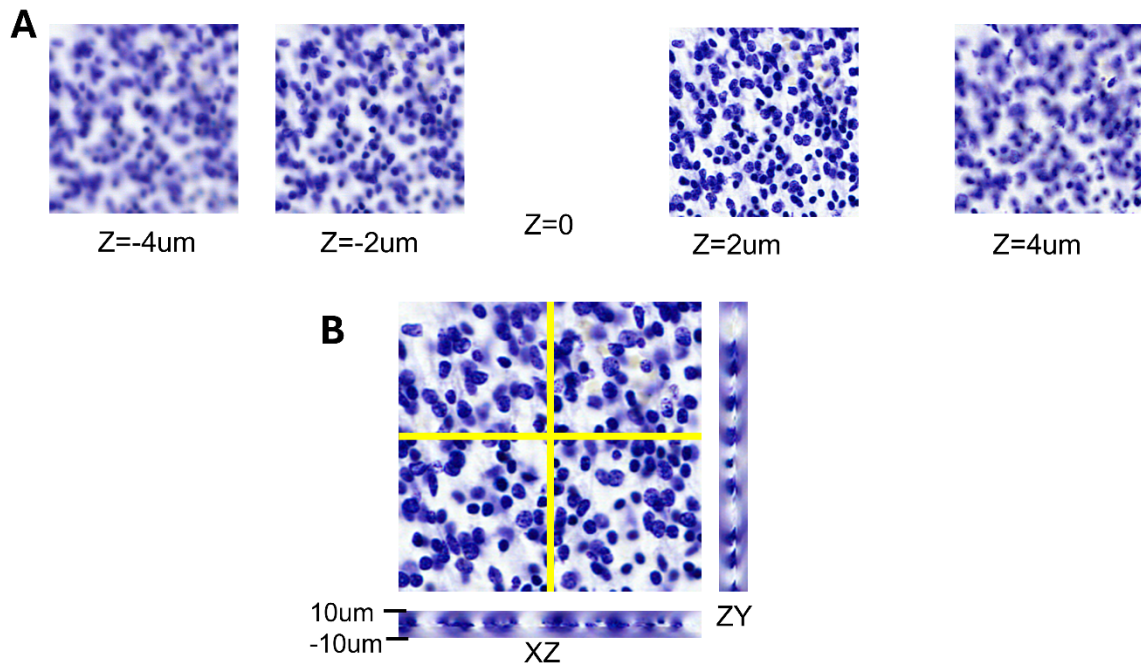

Figure 1 A shows the panel of images obtained as a z-stack (of z-resolution = 1um) of a Thionin-stained section from the 21GW fetal brain. Panel B shows the in-plane focused image (z=0) along with z-cross sections (marked as ZY and XZ) across the x and y planes given by the yellow lines.

We calculated the correction factor and the post-processing effective thickness for computing the cell densities using a z stack of images (1um z-resolution) obtained by our imaging system (Huron LE 120). Figure S xx shows the z stack of images of a thionin-stained section of 20 um thickness. Panel A shows the z stack of images that are focussed between -4um to +4um from an image deemed to be the in-focus plane. Panel B shows the in-plane focussed image and the corresponding z slices in the X and Y axis respectively. This method was performed on several randomly chosen regions with varying cell densities to derive the correction factor.

We calculated the following

- 1) The thickness of the section (T) was assumed to be 20 um
- 2) The centres of detected cells within the in-plane focussed sections were marked as mask (A).
- 3) As one moves through the z-stack of images, any cells that were potentially out of focus were appended to the original detection
- 4) The correction factor ( $\beta$  or rho) was calculated as a ratio of the total detected cells and the detected cells in the focussed plane.
- 5) Section densities were calculated as  $(A \times \beta)/T$ .

Using this method, we were able to estimate the average correction factor for the whole brain as 1.04. By observing the effective foci of objects within the section, we could estimate the post-processing thickness of sections, which shows a shrinkage following histological processing. In the example shown above, the objects were in focus only in 14 out of 20 sections within the z-stack. The post-processing thickness estimate for the random samples across the tissue sample was between 13-15 um.

#### S4: Quantifying regional growth in cell counts in the developing human brain: literature review

Despite the large literature on neurogenesis and brain development, very few studies (table 1) have numerically quantified cell counts in the developing human brain, and all previous studies are based on statistical sampling approaches. Previous studies have methodological challenges including non-uniform and sparse statistical sampling, assumptions and/or stereological correction factors, which add to the sample procurement and fixation issues commonly associated with fetal brains.

Earlier, methods such as estimation of DNA weights as a surrogate of cellular growth showed that there is a rapid exponential growth between 10-18 GW followed by a slower phase of expansion after 20GW<sup>1</sup>. H-Thymidine DNA was used as a marker to show that almost all cortical neurogenesis takes place in the first phase of pregnancy<sup>2,3</sup>. More recently, quantification of cellular counts as a function of developmental time was achieved using histology based methods based on random sampling and the extrapolation of cell counts using the optical fractionator approach, in a very limited number of studies<sup>4-8</sup>. Further, regional cell counts have been confined to the developing cortex<sup>7</sup>.

We provide the first comprehensive cell counts based on machine-vision based detection and counting of cells in closely spaced histological sections across the whole brain, which do not suffer from the sparse sampling limitations of the previous studies. In addition, we also provide the first regional counts in a comprehensive set of compartments including subcortical structures. A comparison between our counting estimates and literature data (Table 2) shows that where these estimates exist, they are generally consistent with our findings.

*Table 1 Human brain development cell counts*

| Ref                                | Method                                                               | Age /n                                | Whole brain/<br>parts                | Output relevant to this paper                                                                                                                                       |
|------------------------------------|----------------------------------------------------------------------|---------------------------------------|--------------------------------------|---------------------------------------------------------------------------------------------------------------------------------------------------------------------|
| <b>Histology based cell counts</b> |                                                                      |                                       |                                      |                                                                                                                                                                     |
| Samuelsen et al 2003 <sup>7</sup>  | Cell counts with histology<br>GIEMSA<br>40um<br>paraffin<br>sections | 13- 42<br>GW<br>(n=22)                | Human fetal<br>telencephalon         | Random sampling within sections (100 objects per view) x 10 -12 sections per brain<br>Estimated cell counts= 4.5 billion (13 GW)<br>15 billion (21 GW)              |
| Larsen et al 2006 <sup>5</sup>     | Cell counts with histology<br>GIEMSA<br>40um<br>paraffin<br>sections | New-<br>Born<br>(38-42<br>GW<br>n=10) | Human fetal<br>telencephalon         | Random sampling within sections (100 objects per view) x 10 -12 sections per brain<br>The mean total cell number was 32.6 billion cells (coefficient of error=0.04) |
| Samuelsen et al, 2007 <sup>6</sup> | Cell counts with histology<br>GIEMSA<br>40um<br>paraffin<br>sections | 18-42<br>weeks<br>GW                  | Human fetal<br>telencephalic<br>wall | Estimated cell counts = 15.45 Billion cells (21GW) (same samples as previous paper?)                                                                                |
| Rabinowicz et al 1996 <sup>4</sup> | Cell counts with histology                                           | 17<br>GW to<br>17                     | Regions<br>-Precentral<br>gyrus      | Estimated cell density = 6000 cells/0.001mm <sup>3</sup> (21 GW)<br>4000 cells/0.001mm <sup>3</sup> (17 GW)                                                         |

|                                                   |                                                  |                                  |                                                                                                       |                                                                                                           |
|---------------------------------------------------|--------------------------------------------------|----------------------------------|-------------------------------------------------------------------------------------------------------|-----------------------------------------------------------------------------------------------------------|
|                                                   | Cresyl violet<br>10-25um<br>Paraffin<br>sections | weeks<br>post<br>birth<br>(n= 9) | -Wernicke's<br>area<br>-Broca's area<br>-Calcarine<br>cortex<br>-Cingulate<br>cortex<br>-Frontal pole |                                                                                                           |
| <b>Other methods (qualitative no cell counts)</b> |                                                  |                                  |                                                                                                       |                                                                                                           |
| Rakic & Sidman, 1973 <sup>2</sup>                 | H-thymidine DNA                                  | <6 – 16GW                        | Radiological                                                                                          | Shows neuronal differentiation from progenitors happens only in early gestation                           |
| Dobbing and Sands, 1973 <sup>1</sup>              | pDNA and Cholesterol                             | 10GW to 8 years post birth       | pDNA (weight per volume)                                                                              | Qualitative showing two phases of growth : 1st rapid phase between 10-20 GW and a slower growth from 20GW |

*Table 2 shows the comparison of total and regional cell counts of the fetal brain available in the literature compared to our current study. The literature data is derived from studies using the optical fractionator methods.*

| Region | Rabinowicz et al 1996 <sup>4</sup>                                                              | Samuelsen et al 2000 <sup>8</sup>    | Samuelsen et al 2003 <sup>7</sup>                                                                                          | Samuelsen et al 2007 <sup>6</sup>     | This paper                                                                                                                                                               |
|--------|-------------------------------------------------------------------------------------------------|--------------------------------------|----------------------------------------------------------------------------------------------------------------------------|---------------------------------------|--------------------------------------------------------------------------------------------------------------------------------------------------------------------------|
| Total  | 6000 cells/mm <sup>3</sup><br>( <u>21GW</u> ) = 7.5 x10 <sup>9</sup> (assuming 50 x 50 x 50 mm) |                                      | <u>13GW</u><br>3.01 x 10 <sup>9</sup><br><u>20 GW</u><br>12.8 x 10 <sup>9</sup><br><u>22GW</u> =<br>16.7 x 10 <sup>9</sup> | <u>22GW</u><br>16.7 x 10 <sup>9</sup> | <u>13GW</u><br>3.7 x 10 <sup>9</sup><br><u>21GW</u><br>17.4 x 10 <sup>9</sup>                                                                                            |
| MZ/CP  | -                                                                                               | <u>22GW</u><br>5.7 x 10 <sup>9</sup> | <u>13GW</u><br>0.96 x 10 <sup>9</sup><br><u>20GW</u><br>5.87 x 10 <sup>9</sup><br><u>22GW</u><br>7.05 x 10 <sup>9</sup>    | -                                     | <u>13GW</u><br>0.02x 10 <sup>9</sup><br>(MZ) and<br>0.73 x 10 <sup>9</sup><br>(CP)<br><u>21GW</u><br>0.26 x 10 <sup>9</sup><br>(MZ) and<br>5.3 x 10 <sup>9</sup><br>(CP) |
| SP     | -                                                                                               |                                      | <u>13GW</u><br>0.66 x 10 <sup>9</sup><br><u>20GW</u><br>2.4 x 10 <sup>9</sup><br><u>22GW</u><br>1.9 x 10 <sup>9</sup>      | -                                     | <u>13GW</u><br>0.77 x 10 <sup>9</sup><br><u>21GW</u><br>2.6 x 10 <sup>9</sup>                                                                                            |
| IZ     | -                                                                                               | <u>22GW</u><br>2.2 x 10 <sup>9</sup> | <u>13GW</u><br>0.8 x 10 <sup>9</sup><br><u>20 GW</u><br>3.06 x 10 <sup>9</sup><br><u>22GW</u>                              | -                                     | <u>13GW</u><br>0.80 x 10 <sup>9</sup><br><u>21GW</u><br>3.82 x 10 <sup>9</sup>                                                                                           |

|       |   |                                      |                                                                                                                         |   |                                                                                                                                                                            |
|-------|---|--------------------------------------|-------------------------------------------------------------------------------------------------------------------------|---|----------------------------------------------------------------------------------------------------------------------------------------------------------------------------|
|       |   |                                      | 2.58x 10 <sup>9</sup>                                                                                                   |   |                                                                                                                                                                            |
| VZ/SZ | - | <u>22GW</u><br>5.1 x 10 <sup>9</sup> | <u>13GW</u><br>0.57 x 10 <sup>9</sup><br><u>20GW</u><br>1.44 x 10 <sup>9</sup><br><u>22GW</u><br>4.58 x 10 <sup>9</sup> | - | <u>13GW</u><br>0.25 x 10 <sup>9</sup><br>(SZ) and<br>0.24 x 10 <sup>9</sup><br>(VZ)<br><u>21GW</u><br>0.96 x 10 <sup>9</sup><br>(SZ) and<br>0.12 x 10 <sup>9</sup><br>(VZ) |

## References

1. Dobbing, J. & Sands, J. Quantitative growth and development of human brain. *Arch Dis Child* **48**, 757–767 (1973).
2. Sidman, R. L. & Rakic, P. Neuronal migration, with special reference to developing human brain: a review. *Brain Res* **62**, 1–35 (1973).
3. Rakic, P. & Sidman, R. L. Supravital DNA Synthesis in the Developing Human and Mouse Brain. *Journal of Neuropathology & Experimental Neurology* **27**, 240–276 (1968).
4. Rabinowicz, T., de Courten-Myers, G. M., Petetot, J. M.-C., Xi, G. & de los Reyes, E. Human Cortex Development: Estimates of Neuronal Numbers Indicate Major Loss Late During Gestation. *Journal of Neuropathology & Experimental Neurology* **55**, 320–328 (1996).
5. Larsen, C. C. *et al.* Total number of cells in the human newborn telencephalic wall. *Neuroscience* **139**, 999–1003 (2006).
6. Samuelsen, G. B. *et al.* Severe cell reduction in the future brain cortex in human growth-restricted fetuses and infants. *American Journal of Obstetrics and Gynecology* **197**, 56.e1-56.e7 (2007).
7. Samuelsen, G. B. *et al.* The Changing Number of Cells in the Human Fetal Forebrain and its Subdivisions: A Stereological Analysis. *Cerebral Cortex* **13**, 115–122 (2003).
8. Samuelsen, G. B. *et al.* TOTAL CELL NUMBER IN FETAL BRAIN. *Image Analysis and Stereology* **19**, 35–38 (2000).



### S5: Evaluation of the detection of mitotic figures in H&E

We evaluated the markings and detections of mitotic figures in the H&E sections by comparing them with adjacent sections stained with immunohistochemistry of the proliferative marker Ki-67. Figure 1 shows two regions from the H&E stained histological section (A) and the adjacent section stained using DAB-based immunohistochemistry of the Ki-67. As shown in the figure, the detection of mitotic figures in the H&E stained sections are limited by the relative contrast of the stain. The Ki-67 antibody stain provided more contrast and more mitotic figures could be detected. Examination of the relative numbers and spacing of the mitotic figures detected in the Ki-67 stained sections, showed a ratio of about two. This implies that the mitotic figures visually detected in the H&E sections may be underestimating the correct number by a factor of two.

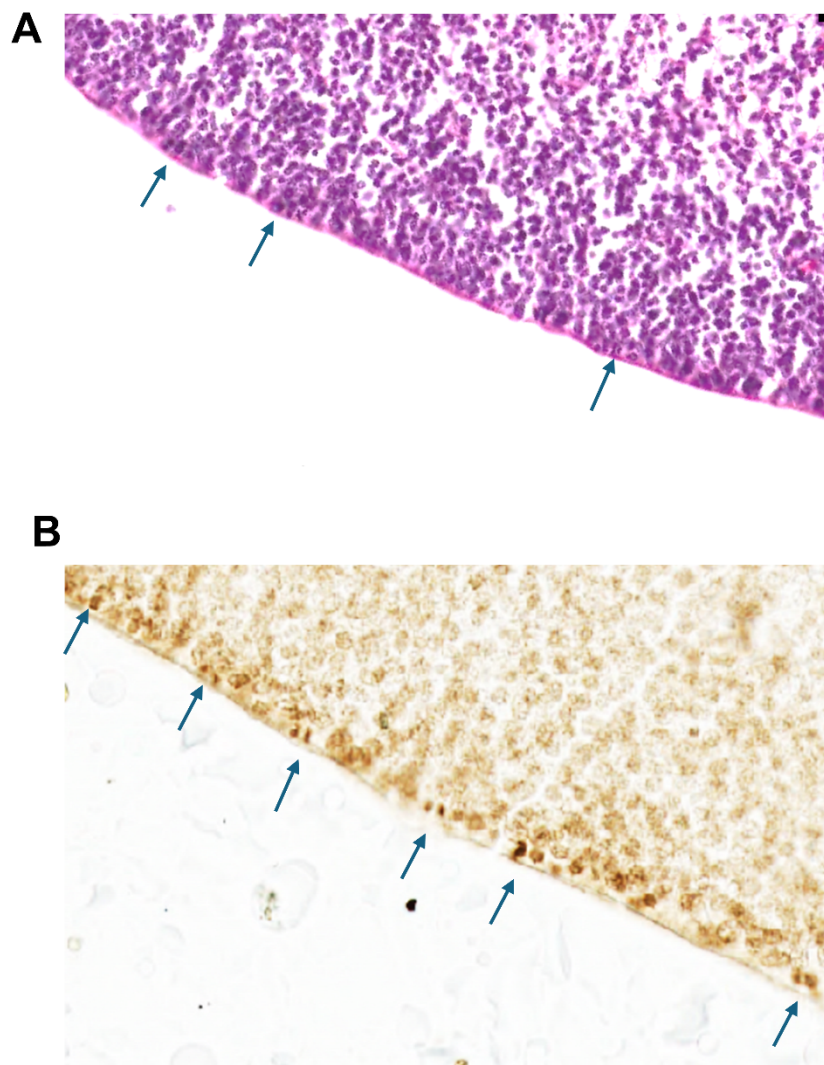

*Figure 1 shows detected mitotic figures in the ventricular zone (VZ) of a section stained with H&E (A) and an adjacent section stained for Ki-67, a proliferative marker (B). The arrows show the detected mitotic figures in both staining.*

## Nomenclature for developing brain compartments

The existing nomenclature for atlas compartments of the developing human brain is complex and includes names and abbreviations of not only the evolving brain parts (brain regions, fiber tracts and ventricles but also the transitive developmental structures, such as the ganglionic eminence and the migratory streams.

**Problems associated with atlas nomenclatures and our approach based on coordinate frameworks and a flat list of cytoarchitectonic regions:** Brain atlases have named compartments, with the terminology for mammals being derived from the early work of His<sup>1</sup>. Over time, there has been a proliferation of atlases that differ in compartment boundaries and nomenclatures. Even within a given species, there are multiple atlases with nomenclatures that are not easy to reconcile. In humans, the complexity is higher owing to the larger number of distinct anatomical parcellations. In addition to the challenges that exist for adult atlas nomenclature, development atlases add the extra dimension of time. Adult atlases may be regarded as parcellations of brain space. Developmental atlases conceptually require a parcellation of developmental space-time, considering the formation of new compartments at relevant developmental time points as well as the disappearances of transient structures. Even if a compartment remains trackable throughout development, functional nomenclature appropriate for the adult may not be appropriate for the developing fetus. For these reasons, it is preferable to move towards a common coordinate system-based approach, where a specific location in the brain at a particular age is specified using an appropriate three-dimensional coordinate in a reference brain.

This has been our motivation in focusing on the coordinate framework and reference brain volumes in the current manuscript. Nevertheless, to maintain continuity with the literature we also provide a parcellation and nomenclature for the developmental ages under study in the manuscript. We adopt an approach developed earlier<sup>2</sup> in which we prioritize a parcellation of the brain into non-overlapping compartments, the union of which gives back the entire brain space. The parcels are chosen to have visibly well-defined boundaries based on cytoarchitectonic differences across boundaries at a given age. We do not focus on how to group those parcels into a hierarchy since that is often the origin of the debates between neuroanatomists. Some high-level groupings are obvious and canonical and may be easily layered on top of the lowest level parcels.

**Discussion of previous atlases and nomenclatures of the developing human brain:** The relevant nomenclature for developing mammalian brains has largely been derived so far from developmental studies in model organisms, mostly rodents and primates. This includes parcellations based on a hierarchical gene nomenclature (The Gene Ontology<sup>3</sup>) with more than 500 directly related terms that are associated with textual definitions, and references and models the development of a neuronal structure to the developmental process (e.g., “telencephalon development is part of forebrain development”;<sup>3</sup>). However, this approach is also limited as it does not fully address the spatial and temporal aspects of the brain development and does not reconcile the problem of different nomenclatures within the same species. Puellas and colleagues<sup>4</sup> have attempted to reconcile the classical nomenclature with gene expression patterns and those derived from embryonic prosomeres<sup>4,5</sup>. The problem of the developing cortical regions was addressed by the Boulder Committee nomenclature<sup>6,7</sup>, however, this nomenclature leaves out subcortical regions.

The widely accepted print atlas of human brain development by Bayer and Altmann<sup>8</sup> uses nomenclature derived from adult brain atlases/textbooks supplemented with Bayer and Altmann’s own work on rat brain development<sup>9</sup>. This atlas, however, has conflicting names particularly for the developing cortical zones, referred to as the Stratified transitional fields in their publications. More recently, developmental human brain nomenclature was developed for 15 PCW and 22 PCW brains by the Allen Brain Institute<sup>10</sup>, in an attempt to reconcile the ontology used by the Boulder Committee and the adult brain atlases. These authors provide a hierarchically organized nomenclature that include more than 3000 terms for both the fetus and adult human brain. These terms include names for adult brain regions which are based on “function” which are questionable when applied to fetal brains as there is little experimental basis for such functional

designation. Further, several terms are included which are not associated with textual definitions, and not all of the terms are associated with atlas delineations.

**Details of our approach:** As previously discussed, our focus has been on establishing a reference coordinate system based on skull landmarks, with the idea that atlas parcellations or annotations may be regarded as superposed layers on top of the underlying coordinate system in the reference brains we present. For atlas annotation purposes we have carried out a histology and cytoarchitecture based parcellation of the entire brains involved, while maintaining correspondence with known brain atlases<sup>7,8,10</sup>. Regarding nomenclature, we therefore focus on a flat list of names of these compartments. Table 1 below highlights the marked regions for the plates of histological samples used in this study namely the 13 GW and 21 GW fetal brains.

The list of names we use in this manuscript to designate nonoverlapping compartments include 119 terms presented in the 2D atlas plates as well as in the regional cell count tables. Each term has a name, abbreviation, a textual definition, and a hexadecimal color code used to mark the associated delineations. The terminology included largely follows the nomenclatures proposed by Bayer and Altman<sup>8</sup>, AIBS<sup>10</sup>, and by the Boulder Committee<sup>6,7</sup>. We also included terms proposed by Zecevic<sup>11</sup>, and by Kostovic & Judas<sup>12</sup>. The nomenclature we utilize includes terms and definitions specific only to the human brain, and it is generally not hierarchically organized, although we utilize some generally agreed groupings (eg “thalamus” or “basal ganglia”) to summarize our tables of counts, or to assign residual compartments that are not otherwise specified after individual sub-nuclei have been specified.

*Table 1 Named brain compartments for the 13GW and 21GW brains relevant to this manuscript*

| 13GW  |                                          |      | 21GW  |                                          |      |
|-------|------------------------------------------|------|-------|------------------------------------------|------|
| ID    | Brain Region                             | Abbr | id    | Brain region                             | Abbr |
| 10157 | gray matter of forebrain                 | FGM  | 10157 | gray matter of forebrain                 | FGM  |
| 10349 | basal forebrain                          | BF   | 10349 | basal forebrain                          | BF   |
| 11580 | subpial granular zone                    | SG   | 11580 | subpial granular zone                    | SG   |
| 10508 | marginal zone                            | MZ   | 10508 | marginal zone                            | MZ   |
| 10515 | cortical plate                           | CP   | 10515 | cortical plate                           | CP   |
| 10522 | subplate zone                            | SP   | 10506 | subplate zone                            | SP   |
| 10529 | intermediate zone                        | IZ   | 10529 | intermediate zone                        | IZ   |
| 10536 | subventricular zone                      | SZ   | 10522 | subventricular zone                      | SZ   |
| 10542 | ventricular zone                         | VZ   | 10542 | ventricular zone                         | VZ   |
| 10506 | transient structures of forebrain        | FTS  |       |                                          |      |
| 10549 | Ganglionic eminence (VZ in basal nuclei) | GE   | 10549 | Ganglionic eminence (VZ in basal nuclei) | GE   |
| 10294 | hippocampus (hippocampal formation)      | HIP  | 10294 | hippocampus (hippocampal formation)      | HIP  |
| 12170 | hippocampal gyrus (formation)            | HiF  | 12170 | hippocampal gyrus (formation)            | HiF  |
| 12162 | parahippocampal gyrus                    | PHG  | 12162 | parahippocampal gyrus                    | PHG  |
| 10361 | amygdala                                 | AMY  | 10361 | amygdala                                 | AMY  |
| 10312 | piriform-entorhinal-amygdaloid area      | PEA  | 10312 | piriform-entorhinal-amygdaloid area      | PEA  |
| 10311 | Piriform cortex                          | Pir  | 10311 | Piriform cortex                          | Pir  |

|          |                                 |      |          |                                    |       |
|----------|---------------------------------|------|----------|------------------------------------|-------|
|          |                                 |      | 10317    | entorhinal cortex                  | EC    |
|          |                                 |      | 10288    | insular cortex                     | ICx   |
| 10304    | indusium griseum                | IG   | 10304    | indusium griseum                   | IG    |
| 10350    | septal nuclei                   | SEP  | 10350    | septal nuclei                      | SEP   |
|          |                                 |      | 13076    | subcallosal gray zone              | ScG   |
|          |                                 |      | 11634    | MZ in insular cortex               | iMZ   |
|          |                                 |      | 11728    | CP in insular neocortex            | iCP   |
|          |                                 |      | 11742    | CP in entorhinal cortex            | CPEC  |
|          |                                 |      | 13207    | SG of the allocortex               | alSG  |
|          |                                 |      | 10513    | MZ of the allocortex               | alMZ  |
|          |                                 |      | 10534    | IZ of the allocortex               | alIZ  |
|          |                                 |      | 11638    | MZ in subicular cortex             | MZsub |
|          |                                 |      | 11738    | CP in subicular cortex             | CPsub |
|          |                                 |      | 11787    | SP in the subicular cortex         | SPsub |
|          |                                 |      | 11875    | IZ in subicular cortex             | IZsub |
|          |                                 |      | 13280    | CP in parasubicular cortex         | CPpas |
| 13078    | perifornical gray zone          | PFG  | 13078    | perifornical gray zone             | PFG   |
| 10331    | basal nuclei                    | BN   | 10331    | basal nuclei                       | BN    |
| 10334    | caudate nucleus                 | Ca   | 10334    | caudate nucleus                    | Ca    |
| 1.46E+08 | Caudate Putamen cell bridges    | CaPu | 1.46E+08 | Caudate Putamen cell bridges       | CaPu  |
|          |                                 |      | 10335    | head of the caudate                | CaH   |
| 10338    | Putamen                         | Pu   | 10338    | Putamen                            | Pu    |
| 10333    | Striatum                        | STR  | 10333    | Striatum                           | STR   |
| 10346    | Clastrum                        | Cla  | 10346    | Clastrum                           | Cla   |
| 10339    | nucleus accumbens               | NAC  | 10339    | nucleus accumbens                  | NAC   |
| 10342    | globus pallidus                 | GP   | 10342    | globus pallidus                    | GP    |
| 10384    | bed nucleus of stria terminalis | BNST | 10384    | bed nucleus of stria terminalis    | BNST  |
| 10573    | external capsule                | extC | 10573    | external capsule                   | extC  |
| 10581    | internal capsule                | ic   | 10581    | internal capsule                   | ic    |
| 10559    | anterior commissure             | ac   | 10559    | anterior commissure                | ac    |
| 10557    | white matter of forebrain       | fwm  | 10557    | white matter of forebrain          | fwm   |
| 10591    | stria terminalis                | st   | 10591    | stria terminalis                   | st    |
| 10576    | fornix                          | fx   | 10576    | fornix                             | fx    |
| 10561    | corpus callosum                 | cc   | 10561    | corpus callosum                    | cc    |
| 12021    | olfactory recess                | olr  | 12021    | olfactory recess                   | olr   |
| 10567    | posterior commissure            | poc  | 10567    | posterior commissure               | poc   |
| 10644    | optic chiasm                    | oc   | 10644    | optic chiasm                       | oc    |
| 10390    | thalamus                        | THM  | 10390    | thalamus                           | THM   |
|          |                                 |      | 10364    | central medial nucleus of thalamus | CeM   |
|          |                                 |      | 10391    | dorsal thalamus                    | DTH   |

|       |                                                         |       |       |                                                         |       |
|-------|---------------------------------------------------------|-------|-------|---------------------------------------------------------|-------|
|       |                                                         |       | 10397 | medial nuclear complex of thalamus                      | MNC   |
| 10464 | reticular nucleus of thalamus                           | R     | 10464 | reticular nucleus of thalamus                           | R     |
|       |                                                         |       | 10409 | Pulvinar of the thalamus                                | Pul   |
|       |                                                         |       | 10389 | subthalamus                                             | SubTH |
| 10465 | subthalamic nucleus                                     | STH   | 10465 | subthalamic nucleus                                     | STH   |
|       |                                                         |       | 12101 | subcommisural organ                                     | SCO   |
| 12247 | red nucleus                                             | RN    | 12247 | red nucleus                                             | RN    |
| 10451 | epithalamus                                             | ETH   | 10451 | epithalamus                                             | ETH   |
| 10467 | hypothalamus                                            | HTH   | 10467 | hypothalamus                                            | HTH   |
| 10556 | rostral migratory stream                                | RMS   | 10556 | rostral migratory stream                                | RMS   |
| 10463 | zona incerta                                            | ZI    | 10463 | zona incerta                                            | ZI    |
| 13034 | substantia innominata                                   | SI    | 13034 | substantia innominata                                   | SI    |
| 10462 | nucleus of the field of Forel                           | FF    | 10462 | nucleus of the field of Forel                           | FF    |
| 12181 | pretectal region                                        | PTR   | 12181 | pretectal region                                        | PTR   |
| 12292 | superior colliculus                                     | SC    | 12292 | superior colliculus                                     | SC    |
| 12305 | inferior colliculus                                     | IC    | 12305 | inferior colliculus                                     | IC    |
| 12209 | periaqueductal gray                                     | PAG   | 12209 | periaqueductal gray                                     | PAG   |
| 10650 | white matter of midbrain                                | mwm   | 10650 | white matter of midbrain                                | mwm   |
|       |                                                         |       | 10659 | cerebellum                                              | CBH   |
| 13363 | external granular (germinal) zone of lateral hemisphere | CbLTe | 13363 | external granular (germinal) zone of lateral hemisphere | CbLTe |
| 13364 | marginal zone of lateral hemisphere                     | CbLTm | 13364 | marginal zone of lateral hemisphere                     | CbLTm |
| 13366 | inner granular cell zone of lateral hemisphere          | CbLTi | 13366 | inner granular cell zone of lateral hemisphere          | CbLTi |
|       |                                                         |       | 13365 | Purkinje cell zone of lateral hemisphere                | CbLTp |
| 13369 | ventricular (germinal) zone of lateral hemisphere       | CBITv | 13369 | ventricular (germinal) zone of lateral hemisphere       | CBITv |
| 13347 | external granular (germinal) zone of the vermis         | VeTe  | 13347 | external granular (germinal) zone of the vermis         | VeTe  |
| 13348 | marginal zone of the vermis                             | VeTm  | 13348 | marginal zone of the vermis                             | VeTm  |
| 13353 | ventricular (germinal) zone of the vermis               | VeTv  | 13353 | ventricular (germinal) zone of the vermis               | VeTv  |
|       |                                                         |       | 13349 | Purkinje cell zone of the vermis                        | VeTp  |
| 13350 | inner granular cell zone of the vermis                  | VeTi  | 13350 | inner granular cell zone of the vermis                  | VeTi  |
| 10660 | cerebellar deep nuclei                                  | CbDN  | 10660 | cerebellar deep nuclei                                  | CbDN  |
| 10664 | Rhombic lip                                             | RhL   |       |                                                         |       |
| 10310 | optic tract                                             | ot    | 10310 | optic tract                                             | ot    |

|          |                                                      |       |          |                                           |       |
|----------|------------------------------------------------------|-------|----------|-------------------------------------------|-------|
| 12230    | cerebral peduncle (crus cerebri)                     | cpd   | 12230    | cerebral peduncle (crus cerebri)          | cpd   |
| 10668    | white matter of hindbrain                            | hwm   | 10668    | white matter of hindbrain                 | hwm   |
|          |                                                      |       | 10652    | surface structures of midbrain            | MSS   |
| 12462    | superior olivary complex                             | SOC   |          |                                           |       |
| 10649    | gray matter of midbrain                              | MGM   |          |                                           |       |
| 12251    | substantia nigra                                     | SN    | 12251    | substantia nigra                          | SN    |
| 10661    | Pontine nucleus                                      | PN    | 10661    | Pontine nucleus                           | PN    |
| 12406    | pons                                                 | Pn    | 12406    | pons                                      | Pn    |
|          |                                                      |       | 12346    | afferent nuclei of cranial nerves in pons | PnAN  |
|          |                                                      |       | 12405    | basilar pons                              | PnBa  |
|          |                                                      |       | 12416    | pontine tegmentum                         | PnTg  |
| 12195    | midbrain tegmentum                                   | MTg   | 12195    | midbrain tegmentum                        | MTg   |
| 12645    | other nuclei in medullary tegmentum                  | XMoTg | 12645    | other nuclei in medullary tegmentum       | XMoTg |
| 10662    | myelencephalon (medulla oblongata)                   | Mo    | 10662    | myelencephalon (medulla oblongata)        | Mo    |
|          |                                                      |       | 12535    | pyramidal part of medulla oblongata       | MoPy  |
| 12890    | spinal cord                                          | SpC   | 12890    | spinal cord                               | SpC   |
| 10460    | pineal body                                          | Pin   | 10460    | pineal body                               | Pin   |
| 12270    | interpeduncular nucleus                              | IP    | 12270    | interpeduncular nucleus                   | IP    |
| 12600    | inferior olive                                       | IO    | 12600    | inferior olive                            | IO    |
|          |                                                      |       | 12272    | pyramidal decussation                     | xpy   |
|          |                                                      |       | 10654    | gray matter of the hindbrain              | HGM   |
|          |                                                      |       | 15544    | optic nerve                               | on    |
|          |                                                      |       | 12331    | corticopontine fibers midbrain portion    | cpn-m |
|          |                                                      |       | 1.46E+08 | white matter of the spinal cord           | swm   |
|          |                                                      |       | 12811    | median aperture (foramen of Magendie)     | ma4V  |
|          |                                                      |       | 12420    | facial nucleus                            | 7N    |
| 1.46E+08 | transient cell zone in external capsule              | Tcete |          |                                           |       |
| 12354    | superior cerebellar peduncle (brachium conjunctivum) | scp   |          |                                           |       |
| 12098    | cavum pellucidum                                     | Pell  |          |                                           |       |
| 2.66E+08 | corticopontine fibers pontine part                   | cpn   |          |                                           |       |
| 12304    | diagonal band                                        | dib   |          |                                           |       |
| 10590    | stria medullaris of thalamus                         | smt   |          |                                           |       |
| 10568    | corona radiata                                       | cor   |          |                                           |       |

|       |                               |      |  |  |  |
|-------|-------------------------------|------|--|--|--|
| 12344 | interpedunculotegmental tract | iptg |  |  |  |
|-------|-------------------------------|------|--|--|--|

## References

1. His, W. *Die anatomische Nomenclatur: Nomina anatomica*. (Veit, 1895).
2. Mezas, C., Huo, B., Bota, M., Jayakumar, J. & Mitra, P. P. Establishing neuroanatomical correspondences across mouse and marmoset brain structures. *BioRxiv* (2024)  
**doi:** <https://doi.org/10.1101/2024.05.06.592808>
3. Hill, D. P., Berardini, T. Z., Howe, D. G. & Van Auken, K. M. Representing ontogeny through ontology: A developmental biologist's guide to the gene ontology. *Molecular Reproduction and Development* **77**, 314–329 (2010).
4. Puelles, L., Harrison, M., Paxinos, G. & Watson, C. A developmental ontology for the mammalian brain based on the prosomeric model. *Trends Neurosci* **36**, 570–578 (2013).
5. Nieuwenhuys, R. & Puelles, L. *Towards a New Neuromorphology*. (Springer International Publishing, Cham, 2016). doi:10.1007/978-3-319-25693-1.
6. Angevine Jr., J. B. *et al.* Embryonic vertebrate central nervous system: Revised terminology. *The Anatomical Record* **166**, 257–261 (1970).
7. Bystron, I., Blakemore, C. & Rakic, P. Development of the human cerebral cortex: Boulder Committee revisited. *Nat Rev Neurosci* **9**, 110–122 (2008).
8. Bayer, S. A. & Altman, J. *The Human Brain During the Second Trimester*. (CRC Press, 2005). doi:10.1201/9780203507483.
9. Altman, J. & Bayer, S. A. Horizontal compartmentation in the germinal matrices and intermediate zone of the embryonic rat cerebral cortex. *Experimental Neurology* **107**, 36–47 (1990).
10. Ding, S.-L. *et al.* Cellular resolution anatomical and molecular atlases for prenatal human brains. *J Comp Neurol* **530**, 6–503 (2022).
11. Zecevic, N. & Verney, C. Development of the catecholamine neurons in human embryos and fetuses, with special emphasis on the innervation of the cerebral cortex. *Journal of Comparative Neurology* **351**, 509–535 (1995).
12. Kostović, I. & Judaš, M. Embryonic and Fetal Development of the Human Cerebral Cortex. in *Brain Mapping* (ed. Toga, A. W.) 167–175 (Academic Press, Waltham, 2015). doi:10.1016/B978-0-12-397025-1.00193-7.
